# Supplementary material for: Identification and Experimental Validation of Marker Genes between Diabetes and Alzheimer’s Disease
Source: Hindawi journal article supplement (doi:10.1155/2022/8122532), 2022-01-01
Supplement: f2 [file 8122532.f2.pdf]

| Gene       | logFC     | AveExpr   | t         | P. Value | adj. P. Val | B         |
|------------|-----------|-----------|-----------|----------|-------------|-----------|
| NACAP1     | -2.454473 | 8.1697647 | -14.74807 | 5.75E-10 | 8.38E-06    | 12.605671 |
| LOC439938  | -2.446467 | 3.5077813 | -14.35946 | 8.20E-10 | 8.38E-06    | 12.317795 |
| MOP-1      | -2.047396 | 2.8611512 | -13.64279 | 1.61E-09 | 1.10E-05    | 11.759295 |
| CTDP1      | -2.107118 | 6.2610536 | -12.9133  | 3.32E-09 | 1.70E-05    | 11.151422 |
| DNAAF2     | -2.195586 | 3.5784863 | -12.51279 | 5.00E-09 | 2.05E-05    | 10.799562 |
| LOC1019285 | 2.2856235 | 5.0888377 | 12.005592 | 8.56E-09 | 2.76E-05    | 10.334348 |
| YEATS4     | -2.865605 | 3.3029557 | -11.91318 | 9.45E-09 | 2.76E-05    | 10.247136 |
| N4BP2L2-IT | -2.093214 | 3.5880967 | -11.71554 | 1.17E-08 | 3.00E-05    | 10.057984 |
| STAR       | -2.275345 | 5.0452363 | -11.55561 | 1.40E-08 | 3.18E-05    | 9.9022731 |
| FADD       | -1.978662 | 5.6898007 | -11.16293 | 2.18E-08 | 4.46E-05    | 9.5095583 |
| LOC1005073 | -1.935001 | 4.9166832 | -10.72394 | 3.63E-08 | 6.40E-05    | 9.0523827 |
| GOLGA6L6   | -2.002631 | 3.1922826 | -10.69551 | 3.75E-08 | 6.40E-05    | 9.0220976 |
| DCAF12L2   | -1.691459 | 3.4355548 | -10.3479  | 5.69E-08 | 8.96E-05    | 8.6448119 |
| CCDC115    | -1.860609 | 4.7790026 | -10.07992 | 7.91E-08 | 0.0001155   | 8.3449813 |
| TSSC1      | -2.298641 | 4.9716805 | -10.0065  | 8.66E-08 | 0.0001181   | 8.2614395 |
| PIM2       | -1.910164 | 5.3237066 | -9.812558 | 1.10E-07 | 0.0001398   | 8.0378045 |
| LINC01352  | -1.706496 | 3.0385361 | -9.773148 | 1.16E-07 | 0.0001398   | 7.9918314 |
| SKA3       | -2.104495 | 3.9834602 | -9.575877 | 1.49E-07 | 0.0001699   | 7.7589737 |
| LOC1019285 | -1.978311 | 4.6025174 | -9.484256 | 1.68E-07 | 0.0001736   | 7.6492573 |
| LRRC55     | -2.080674 | 4.6044493 | -9.477844 | 1.70E-07 | 0.0001736   | 7.6415414 |
| SYT6       | -1.629629 | 4.4666521 | -9.381833 | 1.92E-07 | 0.0001874   | 7.5254112 |
| DCLK3      | -1.84255  | 3.1608347 | -9.319764 | 2.09E-07 | 0.000194    | 7.4497412 |
| PIGH       | -2.388039 | 4.8041261 | -9.242987 | 2.31E-07 | 0.0002054   | 7.3554864 |
| ZNF587     | -1.481155 | 4.6349995 | -9.094621 | 2.81E-07 | 0.0002398   | 7.1712812 |
| FAM58A     | -2.079039 | 6.9488971 | -9.05742  | 2.96E-07 | 0.0002419   | 7.124664  |
| ZNF85      | -1.533173 | 3.891416  | -9.000657 | 3.19E-07 | 0.0002468   | 7.0531964 |
| NPY        | -2.481415 | 6.3248128 | -8.985489 | 3.26E-07 | 0.0002468   | 7.0340302 |
| NUBPL      | -1.962829 | 3.4915678 | -8.888625 | 3.71E-07 | 0.0002714   | 6.9109431 |
| USP44      | -1.401011 | 3.0652096 | -8.80308  | 4.17E-07 | 0.0002836   | 6.8012405 |
| MBIP       | -2.131248 | 4.0224884 | -8.796122 | 4.21E-07 | 0.0002836   | 6.7922762 |
| MGAM       | 2.1475279 | 4.8604245 | 8.7657088 | 4.39E-07 | 0.0002836   | 6.7530199 |
| FAM53C     | -1.547178 | 7.2607652 | -8.716656 | 4.70E-07 | 0.0002836   | 6.6894517 |
| LOC219690  | -1.402636 | 3.3410546 | -8.701272 | 4.80E-07 | 0.0002836   | 6.6694506 |
| LOC1005062 | -1.544994 | 4.1814762 | -8.697098 | 4.83E-07 | 0.0002836   | 6.6640178 |
| FFAR4      | -1.286019 | 2.5250502 | -8.693951 | 4.85E-07 | 0.0002836   | 6.6599211 |
| SPG7       | -1.647135 | 4.0716266 | -8.6097   | 5.45E-07 | 0.0003099   | 6.549755  |
| LINC00339  | -2.304237 | 5.0064286 | -8.580032 | 5.68E-07 | 0.0003143   | 6.5107398 |
| EIF3H      | -1.385451 | 7.6218572 | -8.538919 | 6.02E-07 | 0.0003195   | 6.4564806 |
| CDH13      | -1.822223 | 4.7424344 | -8.524866 | 6.14E-07 | 0.0003195   | 6.4378821 |
| DYRK3      | -1.288252 | 4.2585008 | -8.512567 | 6.25E-07 | 0.0003195   | 6.4215833 |
| MNS1       | -1.700984 | 4.8172498 | -8.481979 | 6.52E-07 | 0.0003231   | 6.3809618 |
| KCNQ1-AS1  | -1.438604 | 3.214181  | -8.469929 | 6.63E-07 | 0.0003231   | 6.3649252 |
| LINC01315  | -1.60405  | 3.7948407 | -8.387635 | 7.45E-07 | 0.0003533   | 6.2548838 |
| MELK       | 1.8488518 | 3.8467402 | 8.3736966 | 7.60E-07 | 0.0003533   | 6.2361559 |
| ARL14EP    | -2.359666 | 5.5234236 | -8.291598 | 8.54E-07 | 0.0003883   | 6.1253127 |
| CYP4F62P   | -1.604127 | 3.5798908 | -8.232383 | 9.30E-07 | 0.0004032   | 6.0447966 |
| KIAA1804   | -2.052099 | 4.407425  | -8.223685 | 9.41E-07 | 0.0004032   | 6.0329299 |
| TBC1D8B    | -1.337498 | 3.0323335 | -8.22043  | 9.46E-07 | 0.0004032   | 6.0284862 |
| NPY1R      | -2.633893 | 4.362559  | -8.141439 | 1.06E-06 | 0.0004093   | 5.9202062 |
| UBE2E2     | -1.871418 | 7.5529872 | -8.135047 | 1.07E-06 | 0.0004093   | 5.9114062 |

|            |           |           |           |          |           |           |
|------------|-----------|-----------|-----------|----------|-----------|-----------|
| LOC642776  | -2.006008 | 5.7097359 | -8.127355 | 1.08E-06 | 0.0004093 | 5.9008093 |
| ARMC2      | -2.046836 | 6.8841931 | -8.12723  | 1.08E-06 | 0.0004093 | 5.9006369 |
| RNF169     | -1.535564 | 6.3006384 | -8.126369 | 1.08E-06 | 0.0004093 | 5.899451  |
| FSIP2      | -1.466784 | 2.8877109 | -8.123633 | 1.09E-06 | 0.0004093 | 5.8956787 |
| LOC1019286 | -1.599973 | 3.0795038 | -8.103327 | 1.12E-06 | 0.0004093 | 5.8676553 |
| BCL2L10    | -1.328642 | 4.3468625 | -8.103191 | 1.12E-06 | 0.0004093 | 5.8674677 |
| KDELC2     | 1.3406951 | 4.4217485 | 8.0450921 | 1.22E-06 | 0.0004343 | 5.78697   |
| COL23A1    | -1.648126 | 4.3966561 | -8.038393 | 1.23E-06 | 0.0004343 | 5.7776584 |
| DISP1      | -1.595352 | 5.7163059 | -8.026219 | 1.25E-06 | 0.0004346 | 5.7607202 |
| TAS2R13    | 1.4057802 | 3.46816   | 8.0026321 | 1.30E-06 | 0.0004404 | 5.7278444 |
| NUDT9P1    | -1.364111 | 4.0291955 | -7.994373 | 1.31E-06 | 0.0004404 | 5.7163141 |
| DSCAM-AS1  | -1.573116 | 2.8300914 | -7.92243  | 1.46E-06 | 0.0004767 | 5.615477  |
| SPAG17     | -1.241513 | 3.568962  | -7.918489 | 1.47E-06 | 0.0004767 | 5.6099322 |
| MAGEB3     | -1.82586  | 3.5051588 | -7.904488 | 1.50E-06 | 0.0004791 | 5.5902158 |
| FAM76A     | -1.766969 | 4.6090332 | -7.890059 | 1.53E-06 | 0.0004819 | 5.5698678 |
| APCS       | -1.327921 | 4.0795766 | -7.833275 | 1.67E-06 | 0.0005162 | 5.4895055 |
| NUPL2      | -2.539651 | 6.5481481 | -7.792135 | 1.77E-06 | 0.0005398 | 5.4309985 |
| AICDA      | -1.238651 | 4.1632649 | -7.783178 | 1.79E-06 | 0.0005398 | 5.4182284 |
| LOC1005072 | -1.529746 | 3.6592636 | -7.724348 | 1.96E-06 | 0.0005808 | 5.3340712 |
| LOC1019287 | -1.523363 | 4.325615  | -7.676528 | 2.10E-06 | 0.0006113 | 5.2652994 |
| PTOV1      | -1.669684 | 8.0996554 | -7.671332 | 2.12E-06 | 0.0006113 | 5.2578082 |
| ADAM3A     | -1.253505 | 3.4050913 | -7.659139 | 2.16E-06 | 0.0006139 | 5.2402109 |
| USP43      | -1.514861 | 5.7586687 | -7.627338 | 2.27E-06 | 0.0006259 | 5.1942175 |
| ZNF622     | -1.82575  | 7.6406874 | -7.614824 | 2.31E-06 | 0.0006259 | 5.1760788 |
| APH1A      | -1.210888 | 5.586509  | -7.611508 | 2.32E-06 | 0.0006259 | 5.1712686 |
| IGF2R      | -1.388451 | 5.4328469 | -7.608668 | 2.33E-06 | 0.0006259 | 5.1671466 |
| SLC36A4    | -1.488137 | 3.9704746 | -7.59281  | 2.39E-06 | 0.0006259 | 5.1441146 |
| ZNF426     | -1.56627  | 3.0088961 | -7.582784 | 2.42E-06 | 0.0006259 | 5.1295341 |
| TRAPPC3L   | -1.727257 | 3.4478933 | -7.580302 | 2.43E-06 | 0.0006259 | 5.1259218 |
| PTGER2     | -1.352471 | 2.8716543 | -7.563879 | 2.50E-06 | 0.0006259 | 5.1020015 |
| SMKR1      | -1.73283  | 3.6856642 | -7.561676 | 2.50E-06 | 0.0006259 | 5.0987896 |
| LOC1001291 | -1.660899 | 4.9058933 | -7.560366 | 2.51E-06 | 0.0006259 | 5.0968802 |
| CYP4F2     | -1.409895 | 4.0165134 | -7.518184 | 2.67E-06 | 0.0006525 | 5.0352393 |
| MSANTD2    | -1.979865 | 3.9210032 | -7.517206 | 2.68E-06 | 0.0006525 | 5.0338071 |
| LOC1019271 | -1.513929 | 4.1026203 | -7.497596 | 2.76E-06 | 0.0006644 | 5.005061  |
| MRGPRX2    | -1.319505 | 3.1392515 | -7.469314 | 2.88E-06 | 0.0006857 | 4.9635035 |
| PPP3CB-AS1 | -1.377677 | 4.134453  | -7.429313 | 3.06E-06 | 0.0007207 | 4.9045287 |
| DPP10-AS3  | -1.157418 | 3.1947404 | -7.408976 | 3.16E-06 | 0.0007351 | 4.8744561 |
| KLF10      | -1.607596 | 3.6586215 | -7.401589 | 3.20E-06 | 0.0007352 | 4.8635179 |
| GDF10      | -1.580297 | 3.960122  | -7.369171 | 3.36E-06 | 0.0007642 | 4.815421  |
| ADTRP      | -2.220043 | 4.1663055 | -7.338797 | 3.52E-06 | 0.0007922 | 4.7702166 |
| SLC4A10    | -2.018697 | 4.9404554 | -7.32863  | 3.58E-06 | 0.000796  | 4.7550548 |
| USP19      | -1.509596 | 5.4259693 | -7.318985 | 3.63E-06 | 0.0007993 | 4.7406591 |
| BC040901 / | -1.303756 | 2.592894  | -7.300519 | 3.74E-06 | 0.0008137 | 4.7130574 |
| LYSMD1     | -1.457894 | 5.3791806 | -7.28499  | 3.83E-06 | 0.0008213 | 4.6898059 |
| LOC1019289 | -1.3281   | 3.8478338 | -7.279388 | 3.86E-06 | 0.0008213 | 4.6814105 |
| C1orf159   | -1.512073 | 3.7654921 | -7.274384 | 3.89E-06 | 0.0008213 | 4.6739064 |
| GS1-600G8. | -1.224323 | 3.1051832 | -7.258461 | 3.99E-06 | 0.0008255 | 4.6500046 |
| CLUL1      | -1.56859  | 3.9204808 | -7.253213 | 4.02E-06 | 0.0008255 | 4.6421179 |
| ZNF354A    | -1.420113 | 5.4911417 | -7.240235 | 4.11E-06 | 0.0008255 | 4.6225994 |
| FREM1      | -1.326303 | 4.0573944 | -7.22452  | 4.21E-06 | 0.0008255 | 4.5989308 |

|            |           |           |           |          |           |           |
|------------|-----------|-----------|-----------|----------|-----------|-----------|
| LINC00629  | -1.412531 | 3.1375473 | -7.224215 | 4.21E-06 | 0.0008255 | 4.5984701 |
| FAM81B     | -1.132248 | 2.5968614 | -7.223064 | 4.22E-06 | 0.0008255 | 4.5967358 |
| ZNF674-AS1 | -1.329524 | 3.1228723 | -7.22305  | 4.22E-06 | 0.0008255 | 4.5967143 |
| PTPRK      | -1.568527 | 6.1734863 | -7.213002 | 4.28E-06 | 0.0008255 | 4.5815602 |
| C5orf64    | -1.259321 | 3.4670102 | -7.204076 | 4.35E-06 | 0.0008255 | 4.568085  |
| TMEM57     | -1.287626 | 6.3541088 | -7.203988 | 4.35E-06 | 0.0008255 | 4.5679526 |
| YPEL1      | -1.238006 | 6.8142845 | -7.197693 | 4.39E-06 | 0.0008255 | 4.5584415 |
| LINC00669  | -1.156945 | 2.4399659 | -7.196359 | 4.40E-06 | 0.0008255 | 4.5564257 |
| CSTF2      | -1.20496  | 5.4344852 | -7.153455 | 4.70E-06 | 0.00087   | 4.4914421 |
| C21orf15   | -1.468119 | 5.6068686 | -7.151329 | 4.72E-06 | 0.00087   | 4.4882155 |
| LINC01234  | -1.333173 | 3.3306979 | -7.133683 | 4.85E-06 | 0.0008865 | 4.4614047 |
| LOC1019296 | -1.200892 | 2.3227702 | -7.104091 | 5.08E-06 | 0.0009166 | 4.4163383 |
| SLC25A17   | -1.220318 | 5.0582862 | -7.098466 | 5.13E-06 | 0.0009166 | 4.4077563 |
| SLC25A38   | -1.951665 | 5.4163437 | -7.095728 | 5.15E-06 | 0.0009166 | 4.4035782 |
| MXD3       | -1.126088 | 5.6760469 | -7.079217 | 5.29E-06 | 0.0009327 | 4.3783565 |
| SLC22A4    | -1.389489 | 3.4553497 | -7.073029 | 5.34E-06 | 0.0009338 | 4.3688934 |
| LOC100506C | -1.471548 | 2.7512149 | -7.062317 | 5.43E-06 | 0.0009393 | 4.3524979 |
| LOH12CR2   | -1.256466 | 3.9277213 | -7.057002 | 5.48E-06 | 0.0009393 | 4.3443572 |
| LINC01097  | -1.492221 | 3.2652415 | -7.052376 | 5.52E-06 | 0.0009393 | 4.3372675 |
| LOC153546  | -1.286334 | 5.5101952 | -7.048104 | 5.56E-06 | 0.0009393 | 4.3307193 |
| SPIN4      | -2.467554 | 3.7562561 | -7.038183 | 5.64E-06 | 0.0009464 | 4.3154975 |
| LOC1019277 | -1.622156 | 5.0692317 | -6.981328 | 6.18E-06 | 0.0010128 | 4.2279893 |
| LOC1019278 | -1.117587 | 2.8074065 | -6.98122  | 6.18E-06 | 0.0010128 | 4.2278239 |
| CSK        | -1.280078 | 5.9373351 | -6.97755  | 6.21E-06 | 0.0010128 | 4.2221584 |
| SLC25A15   | -1.112369 | 4.4313658 | -6.974668 | 6.24E-06 | 0.0010128 | 4.217708  |
| SOX17      | -1.60581  | 3.6231216 | -6.970324 | 6.29E-06 | 0.0010128 | 4.2109974 |
| MUC7       | -1.258372 | 3.2463359 | -6.954523 | 6.45E-06 | 0.0010227 | 4.1865649 |
| FRMD6-AS1  | -1.133521 | 3.716731  | -6.954473 | 6.45E-06 | 0.0010227 | 4.1864885 |
| DCP1B      | -1.167012 | 4.4563435 | -6.931585 | 6.69E-06 | 0.0010526 | 4.1510316 |
| DSTNP2     | -1.473977 | 7.9564623 | -6.915074 | 6.87E-06 | 0.0010726 | 4.1254061 |
| LOC388456  | -1.379322 | 3.2534533 | -6.902409 | 7.01E-06 | 0.0010812 | 4.1057209 |
| ARHGAP12   | -1.62191  | 4.0191993 | -6.898325 | 7.05E-06 | 0.0010812 | 4.0993692 |
| ERVH-4     | -1.489274 | 2.9092826 | -6.892821 | 7.12E-06 | 0.0010812 | 4.0908036 |
| ISY1       | -1.162867 | 4.9793714 | -6.891356 | 7.13E-06 | 0.0010812 | 4.088522  |
| TEX30      | -1.292889 | 5.414519  | -6.880718 | 7.26E-06 | 0.0010918 | 4.0719523 |
| RBM10      | -1.176405 | 6.7402306 | -6.873153 | 7.35E-06 | 0.0010937 | 4.0601576 |
| ALOX15     | -1.342374 | 2.8044116 | -6.870515 | 7.38E-06 | 0.0010937 | 4.0560435 |
| THAP7-AS1  | -1.155009 | 3.9918103 | -6.855273 | 7.56E-06 | 0.0011098 | 4.0322484 |
| CHRNA1     | -1.142984 | 3.4661425 | -6.852531 | 7.59E-06 | 0.0011098 | 4.0279645 |
| CCDC62     | -1.175781 | 3.0518047 | -6.838999 | 7.76E-06 | 0.0011262 | 4.0068053 |
| PCDHB16    | -1.739763 | 3.2378312 | -6.831752 | 7.85E-06 | 0.0011315 | 3.9954614 |
| TYRO3P     | -1.293749 | 5.1403861 | -6.823902 | 7.95E-06 | 0.0011379 | 3.9831646 |
| CNTNAP1    | -1.770745 | 8.3795413 | -6.805903 | 8.19E-06 | 0.0011546 | 3.9549366 |
| ASB5       | -1.126337 | 2.1668746 | -6.805423 | 8.19E-06 | 0.0011546 | 3.9541827 |
| NLGN4Y     | -2.321073 | 3.032104  | -6.802041 | 8.24E-06 | 0.0011546 | 3.9488731 |
| PIGN       | -1.269754 | 4.331165  | -6.794432 | 8.34E-06 | 0.001161  | 3.9369215 |
| OR7C2      | -1.537155 | 3.2299294 | -6.773593 | 8.63E-06 | 0.0011927 | 3.9041426 |
| ZSWIM5     | -1.199988 | 5.5786374 | -6.757188 | 8.86E-06 | 0.0012127 | 3.8782912 |
| PKDCC      | -1.298996 | 6.3381251 | -6.751214 | 8.95E-06 | 0.0012127 | 3.8688675 |
| CBFA2T3    | -1.289445 | 6.329906  | -6.751017 | 8.95E-06 | 0.0012127 | 3.8685573 |
| GEN1       | -1.351757 | 3.326237  | -6.737792 | 9.14E-06 | 0.0012193 | 3.8476751 |

|            |           |           |           |          |           |           |
|------------|-----------|-----------|-----------|----------|-----------|-----------|
| MRPL36     | -1.63813  | 6.6141675 | -6.736154 | 9.17E-06 | 0.0012193 | 3.8450869 |
| ZP2        | -1.227211 | 3.8048443 | -6.735566 | 9.18E-06 | 0.0012193 | 3.8441583 |
| RASGRP3    | -1.116561 | 3.6395447 | -6.722119 | 9.38E-06 | 0.0012359 | 3.822895  |
| RNASEH1-AS | -1.137854 | 5.0463944 | -6.719336 | 9.42E-06 | 0.0012359 | 3.8184896 |
| C20orf194  | -1.010661 | 7.8271796 | -6.704953 | 9.65E-06 | 0.0012572 | 3.7957104 |
| FNDC3B     | -1.193148 | 2.4566066 | -6.683783 | 9.99E-06 | 0.0012874 | 3.7621249 |
| PSD        | -1.664388 | 7.6817292 | -6.682682 | 1.00E-05 | 0.0012874 | 3.7603769 |
| LOC1019286 | -1.271637 | 2.5013526 | -6.674922 | 1.01E-05 | 0.0012956 | 3.748047  |
| CHRM5      | -1.728846 | 4.202253  | -6.666291 | 1.03E-05 | 0.0013059 | 3.7343238 |
| COX5B      | -1.307481 | 9.1999964 | -6.657039 | 1.04E-05 | 0.0013177 | 3.7195988 |
| LOC1027237 | -1.411981 | 4.8228652 | -6.650699 | 1.05E-05 | 0.0013233 | 3.7095026 |
| ADAM17     | -1.151009 | 6.3195144 | -6.633215 | 1.08E-05 | 0.0013446 | 3.681626  |
| C1orf204   | -1.410424 | 4.638897  | -6.631722 | 1.09E-05 | 0.0013446 | 3.6792437 |
| TRMT12     | -1.163644 | 5.8158421 | -6.629838 | 1.09E-05 | 0.0013446 | 3.6762369 |
| FAM196A    | -1.520024 | 2.5422994 | -6.610306 | 1.13E-05 | 0.0013672 | 3.6450312 |
| KIAA0408   | -1.140069 | 3.1442568 | -6.609255 | 1.13E-05 | 0.0013672 | 3.6433495 |
| RAB33B     | -1.424674 | 4.8161314 | -6.605513 | 1.14E-05 | 0.0013672 | 3.637364  |
| PRMT3      | -1.570234 | 2.9705482 | -6.605203 | 1.14E-05 | 0.0013672 | 3.6368688 |
| SMCP       | -1.216699 | 4.4959967 | -6.571077 | 1.20E-05 | 0.0014378 | 3.582181  |
| CCDC86     | -1.37328  | 6.2407473 | -6.562597 | 1.22E-05 | 0.0014496 | 3.5685646 |
| SLC26A4    | -1.80974  | 3.361863  | -6.552353 | 1.24E-05 | 0.0014545 | 3.5521008 |
| ALKBH8     | -1.333752 | 3.3838788 | -6.551178 | 1.24E-05 | 0.0014545 | 3.5502112 |
| DTX1       | -1.065311 | 6.4470994 | -6.550097 | 1.24E-05 | 0.0014545 | 3.5484723 |
| NAF1       | -1.946977 | 3.4657864 | -6.546541 | 1.25E-05 | 0.0014547 | 3.5427539 |
| DLG5-AS1   | -1.223377 | 3.7417421 | -6.536931 | 1.27E-05 | 0.0014697 | 3.5272859 |
| TUBGCP5    | -1.365255 | 4.7128577 | -6.518763 | 1.31E-05 | 0.001506  | 3.4980054 |
| ZBED9      | -1.14458  | 3.7097541 | -6.511689 | 1.33E-05 | 0.0015153 | 3.4865917 |
| LM07DN     | -1.222831 | 3.298756  | -6.493899 | 1.37E-05 | 0.0015513 | 3.4578541 |
| LOC1019275 | -1.352518 | 3.4829899 | -6.489111 | 1.38E-05 | 0.0015513 | 3.450111  |
| LOC1019291 | -1.229336 | 2.6055958 | -6.487512 | 1.38E-05 | 0.0015513 | 3.4475243 |
| FRAT1      | -1.141169 | 5.1405319 | -6.477464 | 1.40E-05 | 0.0015688 | 3.4312619 |
| BAALCOS    | -1.282736 | 4.8958995 | -6.47387  | 1.41E-05 | 0.0015697 | 3.4254413 |
| RELT       | -1.151009 | 5.741939  | -6.469736 | 1.42E-05 | 0.0015715 | 3.418744  |
| ZCWPW2     | -1.202191 | 2.8534852 | -6.463472 | 1.44E-05 | 0.0015715 | 3.4085905 |
| AP4E1      | -1.2166   | 4.7135171 | -6.46344  | 1.44E-05 | 0.0015715 | 3.4085392 |
| RAB3A      | -1.959564 | 8.6827299 | -6.458112 | 1.45E-05 | 0.0015748 | 3.399897  |
| NDUFAB1    | -1.430439 | 5.3851558 | -6.455813 | 1.45E-05 | 0.0015748 | 3.3961685 |
| SYTL5      | -1.135179 | 3.241579  | -6.443412 | 1.49E-05 | 0.0015992 | 3.3760354 |
| BTBD6      | -1.301466 | 7.5648574 | -6.43324  | 1.51E-05 | 0.001618  | 3.3595044 |
| PIN1       | -2.027697 | 6.8774278 | -6.426082 | 1.53E-05 | 0.0016272 | 3.3478616 |
| LINC00923  | -1.268273 | 3.2787307 | -6.423602 | 1.53E-05 | 0.0016272 | 3.3438267 |
| C10orf67   | -1.075027 | 6.5356826 | -6.42005  | 1.54E-05 | 0.0016285 | 3.338045  |
| DARS2      | -1.27222  | 4.3358443 | -6.413739 | 1.56E-05 | 0.0016302 | 3.3277688 |
| CIDEC      | -1.202122 | 3.6688183 | -6.4133   | 1.56E-05 | 0.0016302 | 3.3270537 |
| ZNF681     | -1.031821 | 3.8610392 | -6.403474 | 1.59E-05 | 0.001645  | 3.3110401 |
| LINC01180  | -1.385585 | 4.4046969 | -6.401817 | 1.59E-05 | 0.001645  | 3.3083385 |
| KRTAP19-1  | -1.066613 | 2.0724414 | -6.397557 | 1.60E-05 | 0.0016484 | 3.3013898 |
| BTBD18     | -1.448231 | 3.6265216 | -6.3923   | 1.62E-05 | 0.0016547 | 3.2928129 |
| LOC729083  | 1.1486812 | 3.1463899 | 6.3889222 | 1.63E-05 | 0.0016558 | 3.2872986 |
| TIGD2      | -1.666335 | 3.7631638 | -6.377715 | 1.66E-05 | 0.0016591 | 3.268992  |
| TCEAL4     | -1.691167 | 7.3610386 | -6.376419 | 1.66E-05 | 0.0016591 | 3.2668738 |

|            |           |           |           |          |           |           |
|------------|-----------|-----------|-----------|----------|-----------|-----------|
| SCN4A      | -1.489934 | 3.6039796 | -6.369539 | 1.68E-05 | 0.0016591 | 3.2556252 |
| TMEM186    | -1.160351 | 5.5723767 | -6.367171 | 1.69E-05 | 0.0016591 | 3.2517514 |
| PDZRN3-AS1 | -1.827851 | 4.8445887 | -6.363046 | 1.70E-05 | 0.0016591 | 3.2450018 |
| RPS6KA6    | -1.098221 | 4.4710323 | -6.361647 | 1.70E-05 | 0.0016591 | 3.2427127 |
| DSCR9      | -1.474842 | 3.8464576 | -6.361124 | 1.70E-05 | 0.0016591 | 3.2418552 |
| ENTPD3-AS1 | -1.709333 | 3.8980715 | -6.360036 | 1.71E-05 | 0.0016591 | 3.2400749 |
| RALY-AS1   | -1.105542 | 3.4089414 | -6.359936 | 1.71E-05 | 0.0016591 | 3.2399109 |
| KDM4D      | -1.13626  | 3.8805101 | -6.357626 | 1.71E-05 | 0.0016591 | 3.2361293 |
| NF1        | -1.308603 | 3.0313172 | -6.355957 | 1.72E-05 | 0.0016591 | 3.2333959 |
| PCDH10     | -1.190453 | 4.891809  | -6.350967 | 1.73E-05 | 0.0016641 | 3.2252231 |
| SH3PXD2A   | -1.024801 | 6.40461   | -6.348585 | 1.74E-05 | 0.0016641 | 3.2213205 |
| UBE4B      | -1.105989 | 7.9133551 | -6.345664 | 1.75E-05 | 0.0016645 | 3.216533  |
| PRIM2      | -1.245146 | 3.0288035 | -6.320555 | 1.82E-05 | 0.0017187 | 3.1753262 |
| WDR5B      | -1.113583 | 5.1966864 | -6.319453 | 1.83E-05 | 0.0017187 | 3.1735165 |
| LINC00158  | -1.019261 | 4.6480775 | -6.316306 | 1.84E-05 | 0.0017187 | 3.168344  |
| TEX41      | -1.054086 | 2.6835504 | -6.313904 | 1.85E-05 | 0.0017187 | 3.1643967 |
| LOC1019282 | -1.159531 | 6.5228875 | -6.312234 | 1.85E-05 | 0.0017187 | 3.1616509 |
| LARP7      | -1.126423 | 4.0240987 | -6.310263 | 1.86E-05 | 0.0017187 | 3.1584093 |
| PSG5       | -1.145458 | 4.1666254 | -6.300461 | 1.89E-05 | 0.0017338 | 3.1422826 |
| LRTOMT     | -1.358811 | 4.35204   | -6.298476 | 1.89E-05 | 0.0017338 | 3.1390149 |
| MOK        | -1.167641 | 5.4570171 | -6.297106 | 1.90E-05 | 0.0017338 | 3.1367602 |
| SDHAF1     | -1.428054 | 5.8736166 | -6.290658 | 1.92E-05 | 0.0017449 | 3.1261397 |
| LOC1019277 | -1.598958 | 4.7262057 | -6.28539  | 1.94E-05 | 0.0017452 | 3.117459  |
| MATN1-AS1  | -1.450376 | 4.1538366 | -6.280018 | 1.95E-05 | 0.0017452 | 3.1086024 |
| DACT3      | -1.094548 | 6.2191751 | -6.278624 | 1.96E-05 | 0.0017452 | 3.1063031 |
| FAM186A    | -1.22974  | 2.9124119 | -6.278087 | 1.96E-05 | 0.0017452 | 3.1054182 |
| KIAA1586   | -1.386028 | 3.8178953 | -6.277554 | 1.96E-05 | 0.0017452 | 3.1045384 |
| NUB1       | -1.06434  | 5.1480241 | -6.261531 | 2.02E-05 | 0.0017701 | 3.0780897 |
| STRIP2     | -1.324711 | 3.5415704 | -6.256632 | 2.03E-05 | 0.0017712 | 3.0699951 |
| C21orf128  | -1.618927 | 4.6674347 | -6.256096 | 2.03E-05 | 0.0017712 | 3.0691099 |
| KRT84      | -1.644054 | 3.6906825 | -6.246364 | 2.07E-05 | 0.001793  | 3.0530177 |
| SPRNP1     | -1.073962 | 3.8362378 | -6.224328 | 2.15E-05 | 0.0018475 | 3.0165311 |
| LOC1001304 | -1.040757 | 4.4102025 | -6.223148 | 2.15E-05 | 0.0018475 | 3.0145752 |
| MTMR14     | -1.245929 | 5.5215574 | -6.221272 | 2.16E-05 | 0.0018475 | 3.0114638 |
| LINC00460  | -1.492661 | 3.6081483 | -6.211138 | 2.20E-05 | 0.0018718 | 2.9946553 |
| TRMT10A    | -1.013367 | 2.4480115 | -6.20794  | 2.21E-05 | 0.0018729 | 2.9893464 |
| RAP1GAP2   | -1.864424 | 8.4353886 | -6.202967 | 2.23E-05 | 0.0018745 | 2.9810908 |
| DEPTOR     | -1.137714 | 3.7596462 | -6.189422 | 2.28E-05 | 0.0019104 | 2.9585827 |
| LOC1019295 | -1.295861 | 4.2752662 | -6.171944 | 2.35E-05 | 0.0019497 | 2.9294974 |
| CHST2      | -1.082141 | 4.8224845 | -6.169028 | 2.36E-05 | 0.0019497 | 2.9246408 |
| LINC01089  | -1.074652 | 4.6647866 | -6.166834 | 2.37E-05 | 0.0019497 | 2.9209862 |
| LOC440149  | -1.468171 | 3.5474271 | -6.159839 | 2.40E-05 | 0.0019497 | 2.9093272 |
| NDUFB3     | -1.5428   | 7.1946784 | -6.158533 | 2.40E-05 | 0.0019497 | 2.9071493 |
| MEIG1      | -1.175097 | 3.3876422 | -6.15525  | 2.41E-05 | 0.0019529 | 2.9016751 |
| TPRN       | -1.482729 | 6.2960355 | -6.150594 | 2.43E-05 | 0.0019608 | 2.8939071 |
| DAPK2      | -1.19704  | 5.122683  | -6.143515 | 2.46E-05 | 0.0019768 | 2.8820922 |
| FAM155B    | -1.292758 | 4.12225   | -6.137059 | 2.49E-05 | 0.001991  | 2.8713096 |
| PRKAG2-AS1 | -1.246043 | 5.4420506 | -6.122938 | 2.55E-05 | 0.0020317 | 2.8477026 |
| LOC1027233 | -1.176823 | 2.7663561 | -6.118346 | 2.57E-05 | 0.0020357 | 2.8400206 |
| ITK        | -1.965906 | 3.3420464 | -6.112448 | 2.60E-05 | 0.0020357 | 2.8301466 |
| FSCN1      | -1.301606 | 7.752495  | -6.112407 | 2.60E-05 | 0.0020357 | 2.8300779 |

|            |           |           |           |          |           |           |
|------------|-----------|-----------|-----------|----------|-----------|-----------|
| SF3A3      | -1.194595 | 6.5899999 | -6.109382 | 2.61E-05 | 0.0020357 | 2.825013  |
| MYO1H      | -1.656058 | 4.6790879 | -6.109335 | 2.61E-05 | 0.0020357 | 2.8249347 |
| IRG1       | -1.157216 | 4.073862  | -6.108309 | 2.62E-05 | 0.0020357 | 2.8232166 |
| USP30-AS1  | -1.296842 | 4.2872484 | -6.099574 | 2.66E-05 | 0.0020415 | 2.8085796 |
| UBE3D      | -1.02072  | 2.7360475 | -6.098258 | 2.66E-05 | 0.0020415 | 2.8063728 |
| NAGK       | -1.126398 | 6.8542383 | -6.097668 | 2.66E-05 | 0.0020415 | 2.8053839 |
| CEP135     | -1.197    | 3.5046975 | -6.095661 | 2.67E-05 | 0.0020415 | 2.8020188 |
| LMO3       | -1.081306 | 7.0275506 | -6.092271 | 2.69E-05 | 0.0020458 | 2.7963341 |
| C6orf195   | -1.355524 | 3.2935282 | -6.089169 | 2.70E-05 | 0.0020491 | 2.7911298 |
| PNRC1      | -1.93379  | 6.3139848 | -6.078295 | 2.76E-05 | 0.00208   | 2.7728766 |
| CD2AP      | -1.160864 | 4.2160648 | -6.071135 | 2.79E-05 | 0.0020804 | 2.7608472 |
| LOC1005059 | -1.342057 | 3.0054684 | -6.068015 | 2.80E-05 | 0.0020804 | 2.7556032 |
| TMCC1-AS1  | -1.291862 | 3.1261428 | -6.067703 | 2.81E-05 | 0.0020804 | 2.7550785 |
| ACSL4      | -1.793572 | 4.0333833 | -6.062614 | 2.83E-05 | 0.0020804 | 2.7465223 |
| LRRC75B    | -1.081773 | 4.9553638 | -6.061195 | 2.84E-05 | 0.0020804 | 2.7441351 |
| MRPL44     | -1.459034 | 5.2875784 | -6.060121 | 2.84E-05 | 0.0020804 | 2.742329  |
| MOB1B      | -1.131788 | 5.0422311 | -6.059091 | 2.85E-05 | 0.0020804 | 2.740596  |
| MASTL      | -1.577448 | 3.317702  | -6.058795 | 2.85E-05 | 0.0020804 | 2.7400978 |
| PTH        | -1.015534 | 2.051717  | -6.058413 | 2.85E-05 | 0.0020804 | 2.7394558 |
| PNP        | 1.4118446 | 4.6212899 | 6.0571194 | 2.86E-05 | 0.0020804 | 2.7372786 |
| RER1       | -1.059535 | 7.2641324 | -6.046466 | 2.91E-05 | 0.0021035 | 2.719344  |
| NR4A2      | -1.292445 | 4.9323149 | -6.045688 | 2.91E-05 | 0.0021035 | 2.7180338 |
| ZNF124     | -1.561275 | 3.8904855 | -6.044544 | 2.92E-05 | 0.0021035 | 2.7161061 |
| MTMR6      | -1.300245 | 4.723327  | -6.037911 | 2.95E-05 | 0.0021202 | 2.70493   |
| LOC1002886 | -1.752717 | 4.284246  | -6.032354 | 2.98E-05 | 0.0021325 | 2.6955606 |
| DCK        | -2.551514 | 4.9761957 | -6.030495 | 2.99E-05 | 0.0021325 | 2.6924265 |
| GTF3C4     | -1.032921 | 5.4419085 | -6.021021 | 3.04E-05 | 0.0021601 | 2.6764403 |
| ZNF702P    | -1.421268 | 2.6622976 | -6.016853 | 3.06E-05 | 0.0021682 | 2.6694025 |
| MTCH1      | -1.491035 | 9.7296284 | -6.010579 | 3.10E-05 | 0.0021767 | 2.6588045 |
| TSEN2      | -1.113178 | 4.4425458 | -6.006768 | 3.12E-05 | 0.0021815 | 2.6523649 |
| POP1       | -1.203389 | 3.9689331 | -6.005262 | 3.12E-05 | 0.0021815 | 2.6498189 |
| TPBGL      | -1.362841 | 4.4693177 | -6.002846 | 3.14E-05 | 0.0021815 | 2.645735  |
| DEGS1      | -1.860481 | 4.6277383 | -5.998521 | 3.16E-05 | 0.0021815 | 2.6384216 |
| LOC339622  | -1.172853 | 2.4028157 | -5.997339 | 3.17E-05 | 0.0021815 | 2.6364209 |
| BZRAP1     | -1.783479 | 6.5983374 | -5.995562 | 3.18E-05 | 0.0021815 | 2.6334163 |
| SEPT7P9    | -1.452791 | 4.2626216 | -5.990604 | 3.20E-05 | 0.0021929 | 2.6250256 |
| EGFL6      | -1.094556 | 2.7309787 | -5.985662 | 3.23E-05 | 0.0021983 | 2.6166586 |
| MMP21      | -1.100718 | 2.8306279 | -5.98432  | 3.24E-05 | 0.0021983 | 2.6143855 |
| EIF3F      | -1.121367 | 4.3735867 | -5.983417 | 3.24E-05 | 0.0021983 | 2.6128562 |
| RABGEF1    | -1.459457 | 4.5012708 | -5.980677 | 3.26E-05 | 0.0022015 | 2.6082157 |
| ZFP92      | -1.063578 | 5.6619376 | -5.9751   | 3.29E-05 | 0.0022155 | 2.5987647 |
| FOXN3-AS2  | -1.198969 | 2.9366404 | -5.960601 | 3.38E-05 | 0.0022376 | 2.5741747 |
| BRE        | -1.106894 | 5.9406107 | -5.958675 | 3.39E-05 | 0.0022376 | 2.5709063 |
| BCL7A      | -1.118522 | 5.871726  | -5.956934 | 3.40E-05 | 0.0022376 | 2.5679505 |
| NUP133     | -1.225303 | 5.4963362 | -5.956089 | 3.40E-05 | 0.0022376 | 2.566516  |
| HBBP1      | -1.319845 | 4.181516  | -5.952778 | 3.42E-05 | 0.0022376 | 2.5608949 |
| UHRF1      | -1.118537 | 3.7499222 | -5.952547 | 3.42E-05 | 0.0022376 | 2.5605025 |
| FAM126A    | -1.041739 | 3.7975831 | -5.937888 | 3.51E-05 | 0.002288  | 2.5355906 |
| PAK1IP1    | -1.364161 | 6.1576183 | -5.925647 | 3.59E-05 | 0.0023238 | 2.5147641 |
| WHAMMP2    | -1.240106 | 3.2665715 | -5.92531  | 3.59E-05 | 0.0023238 | 2.5141904 |
| LOC646522  | -1.384217 | 3.9059368 | -5.898478 | 3.76E-05 | 0.0024196 | 2.46846   |

|            |           |           |           |          |           |           |
|------------|-----------|-----------|-----------|----------|-----------|-----------|
| ARNTL2     | -1.003715 | 4.7055235 | -5.895678 | 3.78E-05 | 0.0024238 | 2.4636821 |
| NELFB      | -1.087168 | 5.6857049 | -5.88485  | 3.85E-05 | 0.002432  | 2.4451917 |
| GAB2       | -1.133547 | 7.2200354 | -5.880826 | 3.88E-05 | 0.0024415 | 2.4383169 |
| ZC3HAV1L   | -1.156406 | 2.9110925 | -5.877074 | 3.90E-05 | 0.00245   | 2.4319034 |
| DEFB1      | -1.530638 | 3.4831091 | -5.86177  | 4.01E-05 | 0.002501  | 2.4057234 |
| MAML1      | -1.086667 | 5.5663324 | -5.852227 | 4.08E-05 | 0.0025109 | 2.3893808 |
| CPA1       | -1.371873 | 3.1300401 | -5.851463 | 4.08E-05 | 0.0025109 | 2.3880728 |
| HDAC2      | -1.383736 | 5.3894028 | -5.849046 | 4.10E-05 | 0.0025109 | 2.3839311 |
| MOSPD1     | -1.019705 | 3.4431801 | -5.848421 | 4.10E-05 | 0.0025109 | 2.3828606 |
| LOC101928C | -1.191983 | 3.8769313 | -5.847782 | 4.11E-05 | 0.0025109 | 2.3817641 |
| LOC1019297 | -1.341089 | 4.6981285 | -5.847441 | 4.11E-05 | 0.0025109 | 2.3811801 |
| ZMAT1      | -1.358026 | 3.9088983 | -5.841183 | 4.16E-05 | 0.002531  | 2.3704524 |
| SLC2A1-AS1 | -1.352537 | 3.8235761 | -5.833677 | 4.21E-05 | 0.0025507 | 2.3575755 |
| IL13RA2    | -2.234433 | 4.1832894 | -5.831687 | 4.23E-05 | 0.0025507 | 2.3541618 |
| NCAM2      | -1.605371 | 4.57893   | -5.826642 | 4.26E-05 | 0.00256   | 2.3455015 |
| DGKD       | -1.042953 | 6.4757926 | -5.82625  | 4.27E-05 | 0.00256   | 2.3448285 |
| DPP10      | -2.332511 | 5.5147281 | -5.816373 | 4.34E-05 | 0.0025895 | 2.3278618 |
| PVRL3      | -1.300867 | 4.4409115 | -5.813565 | 4.36E-05 | 0.0025915 | 2.3230357 |
| RAB6B      | -1.356283 | 9.2677222 | -5.812614 | 4.37E-05 | 0.0025915 | 2.3214014 |
| PPY        | -1.243076 | 4.2219022 | -5.808993 | 4.40E-05 | 0.0025931 | 2.315176  |
| LOC1005067 | -1.17361  | 3.3933071 | -5.808985 | 4.40E-05 | 0.0025931 | 2.3151611 |
| GIT1       | -1.452622 | 8.9071078 | -5.803504 | 4.44E-05 | 0.0026106 | 2.3057339 |
| PGBD2      | -1.233701 | 4.5639283 | -5.797383 | 4.49E-05 | 0.0026237 | 2.2952015 |
| NEURL4     | -1.47902  | 6.6479983 | -5.778196 | 4.64E-05 | 0.0026983 | 2.2621479 |
| FBN3       | -1.815996 | 3.9403239 | -5.774549 | 4.67E-05 | 0.0027069 | 2.2558578 |
| SLC22A24   | -1.551969 | 3.0837338 | -5.773174 | 4.68E-05 | 0.0027069 | 2.2534863 |
| RARS       | -1.864904 | 4.7655541 | -5.768908 | 4.72E-05 | 0.0027141 | 2.2461275 |
| PCDHGA8    | 1.0042373 | 4.4372951 | 5.7684579 | 4.72E-05 | 0.0027141 | 2.245351  |
| TMEM91     | -1.234791 | 6.2586508 | -5.766052 | 4.74E-05 | 0.002718  | 2.2411991 |
| OPRK1      | -1.136248 | 3.7508546 | -5.763981 | 4.76E-05 | 0.0027203 | 2.2376251 |
| RAB3B      | -1.36303  | 4.5490403 | -5.756897 | 4.82E-05 | 0.0027296 | 2.2253928 |
| LOC730139  | -1.200292 | 4.5435245 | -5.756218 | 4.83E-05 | 0.0027296 | 2.2242195 |
| MREG       | -1.706594 | 5.5356987 | -5.735481 | 5.01E-05 | 0.0028007 | 2.1883686 |
| CLK2       | -1.453924 | 7.6867429 | -5.721922 | 5.13E-05 | 0.0028425 | 2.1648924 |
| ZNF804A    | -1.680899 | 3.3383811 | -5.717167 | 5.17E-05 | 0.0028483 | 2.1566539 |
| BTF3P11    | -1.544202 | 3.2553868 | -5.716103 | 5.18E-05 | 0.0028483 | 2.1548087 |
| AGPAT4     | -1.01599  | 6.7991575 | -5.714392 | 5.20E-05 | 0.0028483 | 2.1518436 |
| LINC00382  | -1.036502 | 2.20896   | -5.713154 | 5.21E-05 | 0.0028483 | 2.1496972 |
| LOC221946  | -1.171946 | 3.5514272 | -5.699469 | 5.33E-05 | 0.0029012 | 2.1259589 |
| ADAMTS18   | -1.066674 | 3.7809686 | -5.69483  | 5.38E-05 | 0.0029034 | 2.1179047 |
| MGC16025   | -1.267986 | 4.3011335 | -5.690801 | 5.42E-05 | 0.0029165 | 2.1109081 |
| RAP2B      | -1.058171 | 5.3883007 | -5.687489 | 5.45E-05 | 0.0029218 | 2.1051545 |
| C19orf12   | -1.043201 | 6.6061394 | -5.683918 | 5.48E-05 | 0.0029255 | 2.0989489 |
| LNP1       | -1.503323 | 6.5233453 | -5.678256 | 5.54E-05 | 0.0029433 | 2.0891079 |
| LOC1019276 | -1.344468 | 3.0510231 | -5.672861 | 5.59E-05 | 0.0029483 | 2.0797239 |
| ELL3       | -1.06165  | 5.3751279 | -5.670105 | 5.62E-05 | 0.0029483 | 2.0749293 |
| CLDN16     | -1.28186  | 3.838688  | -5.669419 | 5.63E-05 | 0.0029483 | 2.0737354 |
| LYZL6      | -1.143509 | 3.8668346 | -5.668664 | 5.63E-05 | 0.0029483 | 2.0724234 |
| NFE4       | -1.454325 | 3.6401333 | -5.668577 | 5.63E-05 | 0.0029483 | 2.0722719 |
| LINC01362  | 1.0149544 | 4.3304465 | 5.6670001 | 5.65E-05 | 0.0029491 | 2.0695269 |
| PIH1D2     | -1.04804  | 2.5646233 | -5.664483 | 5.68E-05 | 0.002952  | 2.0651452 |

|            |           |           |           |          |           |           |
|------------|-----------|-----------|-----------|----------|-----------|-----------|
| COLEC11    | -1.149655 | 5.5472419 | -5.662036 | 5.70E-05 | 0.002952  | 2.0608851 |
| VAPB       | -1.189262 | 7.5843412 | -5.647387 | 5.85E-05 | 0.003     | 2.0353654 |
| TTY15      | -1.875928 | 4.9359455 | -5.640687 | 5.92E-05 | 0.0030233 | 2.0236816 |
| IGLL5      | -1.097136 | 5.5142607 | -5.640228 | 5.93E-05 | 0.0030233 | 2.0228811 |
| NIT1       | -1.29811  | 4.9690684 | -5.637515 | 5.95E-05 | 0.0030304 | 2.0181485 |
| DACH1      | -1.13564  | 4.4691909 | -5.632293 | 6.01E-05 | 0.0030474 | 2.0090363 |
| LOC339803  | -1.034113 | 3.6522531 | -5.631578 | 6.02E-05 | 0.0030474 | 2.0077879 |
| RBBP5      | -1.532362 | 4.2475519 | -5.628336 | 6.05E-05 | 0.0030474 | 2.0021286 |
| ANKS1A     | -1.254627 | 6.3831278 | -5.626051 | 6.08E-05 | 0.0030474 | 1.9981373 |
| LINC00610  | -1.200195 | 3.4776681 | -5.624598 | 6.09E-05 | 0.0030478 | 1.9956013 |
| TRPV6      | -1.092667 | 6.4873386 | -5.614992 | 6.20E-05 | 0.0030928 | 1.9788173 |
| NUAK1      | -1.402703 | 9.6619004 | -5.610882 | 6.24E-05 | 0.0030984 | 1.9716317 |
| NDUFA8     | -1.200118 | 7.5966166 | -5.609892 | 6.25E-05 | 0.0030984 | 1.9699014 |
| SCARNA2    | -1.796819 | 7.8292065 | -5.605937 | 6.30E-05 | 0.0031013 | 1.9629831 |
| PTPRR      | -1.873248 | 4.4634093 | -5.603928 | 6.32E-05 | 0.0031013 | 1.9594693 |
| KIR2DS5    | -1.166667 | 4.381717  | -5.603709 | 6.32E-05 | 0.0031013 | 1.9590854 |
| THAP5      | -1.333048 | 3.6262946 | -5.602725 | 6.33E-05 | 0.0031013 | 1.957364  |
| ANO10      | -1.378212 | 6.8712973 | -5.602617 | 6.34E-05 | 0.0031013 | 1.9571747 |
| LOC1001299 | -1.126014 | 3.7192754 | -5.600512 | 6.36E-05 | 0.0031055 | 1.953491  |
| LOC101929C | -1.434616 | 3.6793249 | -5.598015 | 6.39E-05 | 0.003112  | 1.9491216 |
| LOC284240  | 1.0294493 | 4.1130429 | 5.5951642 | 6.42E-05 | 0.0031204 | 1.9441311 |
| ADRA2C     | -1.211903 | 7.2190159 | -5.592758 | 6.45E-05 | 0.0031221 | 1.9399174 |
| ZCCHC11    | -1.088412 | 3.8150467 | -5.589665 | 6.48E-05 | 0.0031289 | 1.934501  |
| LRRD1      | -1.009486 | 2.2347024 | -5.581586 | 6.58E-05 | 0.0031545 | 1.9203453 |
| PTH2       | -1.191484 | 4.8422247 | -5.579866 | 6.60E-05 | 0.0031545 | 1.9173295 |
| GBP5       | -1.168453 | 3.7906669 | -5.569495 | 6.72E-05 | 0.003191  | 1.8991422 |
| LOC101928C | -1.096436 | 2.5426507 | -5.567054 | 6.75E-05 | 0.0031976 | 1.8948591 |
| ARL1       | -1.247119 | 7.1713465 | -5.563249 | 6.80E-05 | 0.0032024 | 1.8881811 |
| LOC1019294 | -1.044271 | 3.8969671 | -5.559737 | 6.84E-05 | 0.0032024 | 1.8820148 |
| FXVD7      | -1.404491 | 5.0087525 | -5.559709 | 6.84E-05 | 0.0032024 | 1.8819671 |
| LOC283214  | -1.47775  | 3.2369087 | -5.558378 | 6.86E-05 | 0.0032024 | 1.8796296 |
| PAM16      | -1.18903  | 6.3551556 | -5.555387 | 6.89E-05 | 0.0032024 | 1.8743755 |
| GLYATL2    | -1.221123 | 3.9644157 | -5.554306 | 6.91E-05 | 0.0032024 | 1.8724777 |
| TMPO-AS1   | -1.08166  | 4.5308386 | -5.552821 | 6.93E-05 | 0.0032024 | 1.8698691 |
| LOC1005054 | -1.042172 | 4.5073189 | -5.551484 | 6.94E-05 | 0.0032024 | 1.8675195 |
| LONP1      | -1.213217 | 5.6159914 | -5.550889 | 6.95E-05 | 0.0032024 | 1.8664738 |
| ANKRA2     | -1.773291 | 3.8702474 | -5.54187  | 7.06E-05 | 0.0032473 | 1.8506197 |
| GRAMD1B    | -1.144408 | 9.0738278 | -5.538397 | 7.11E-05 | 0.0032544 | 1.844513  |
| UBXN2A     | -1.090186 | 5.8437105 | -5.537926 | 7.11E-05 | 0.0032544 | 1.8436849 |
| KRT2       | -1.214759 | 3.2871036 | -5.5369   | 7.13E-05 | 0.0032544 | 1.8418784 |
| MMD        | -1.382806 | 7.5134016 | -5.534455 | 7.16E-05 | 0.0032614 | 1.8375783 |
| TMPRSS11E  | -1.085542 | 3.568217  | -5.531252 | 7.20E-05 | 0.0032625 | 1.8319413 |
| CXXC4      | -1.133053 | 5.7595861 | -5.530875 | 7.20E-05 | 0.0032625 | 1.8312782 |
| SLN        | -1.383214 | 5.2960559 | -5.527495 | 7.25E-05 | 0.0032625 | 1.8253281 |
| SHISA8     | -1.001386 | 3.6041099 | -5.527382 | 7.25E-05 | 0.0032625 | 1.8251297 |
| LOC101929C | -1.300701 | 4.7402232 | -5.526445 | 7.26E-05 | 0.0032625 | 1.8234801 |
| CD1B       | -1.037486 | 2.6697951 | -5.523021 | 7.31E-05 | 0.0032625 | 1.8174506 |
| PPAP2C     | -1.599398 | 5.660006  | -5.521985 | 7.32E-05 | 0.0032625 | 1.8156264 |
| LOC1019273 | -1.023868 | 2.8907529 | -5.519495 | 7.35E-05 | 0.003268  | 1.8112405 |
| LINC01107  | -1.213116 | 4.4172351 | -5.515422 | 7.41E-05 | 0.003268  | 1.804064  |
| AFM        | -1.012118 | 3.4339483 | -5.515301 | 7.41E-05 | 0.003268  | 1.8038506 |



|            |           |           |           |          |           |           |
|------------|-----------|-----------|-----------|----------|-----------|-----------|
| ZNF667-AS1 | -1.624608 | 8.1361629 | -5.505026 | 7.55E-05 | 0.0033067 | 1.7857363 |
| NDP        | -1.25199  | 6.1919494 | -5.504863 | 7.55E-05 | 0.0033067 | 1.7854487 |
| IRF2BP1    | -1.170041 | 5.0582571 | -5.50243  | 7.58E-05 | 0.0033071 | 1.7811562 |
| C6orf203   | -1.000417 | 4.9237104 | -5.491916 | 7.73E-05 | 0.0033261 | 1.7626023 |
| TRPM2-AS   | -1.072321 | 5.9578429 | -5.491904 | 7.73E-05 | 0.0033261 | 1.7625802 |
| C9orf43    | -1.0656   | 3.5817874 | -5.491508 | 7.73E-05 | 0.0033261 | 1.7618819 |
| THEMIS     | -2.014818 | 3.9137251 | -5.491396 | 7.73E-05 | 0.0033261 | 1.7616838 |
| JAKMIP1    | -1.176    | 7.1038218 | -5.488066 | 7.78E-05 | 0.0033367 | 1.7558032 |
| RAB32      | -1.598027 | 4.4865608 | -5.486623 | 7.80E-05 | 0.0033384 | 1.7532546 |
| CEP44      | -1.212172 | 4.2191176 | -5.483222 | 7.85E-05 | 0.0033518 | 1.7472468 |
| OIT3       | -1.144192 | 3.1448326 | -5.479945 | 7.89E-05 | 0.0033647 | 1.741456  |
| VWCE       | -1.082984 | 5.8534153 | -5.478574 | 7.91E-05 | 0.003366  | 1.739033  |
| COL24A1    | -1.374218 | 6.1235416 | -5.476502 | 7.94E-05 | 0.0033715 | 1.7353714 |
| STXBP5-AS1 | -1.080948 | 4.3854997 | -5.470828 | 8.02E-05 | 0.0033991 | 1.7253379 |
| LYRM1      | -1.673769 | 5.605584  | -5.465241 | 8.11E-05 | 0.0034158 | 1.7154551 |
| LOR        | -1.213792 | 3.9514753 | -5.463746 | 8.13E-05 | 0.0034158 | 1.7128092 |
| KCNJ1      | -1.163433 | 3.1014284 | -5.463533 | 8.13E-05 | 0.0034158 | 1.712433  |
| PCDHB15    | -2.631009 | 4.9850111 | -5.459466 | 8.19E-05 | 0.0034339 | 1.7052348 |
| PNPLA4     | -1.421868 | 5.2230106 | -5.456231 | 8.24E-05 | 0.0034469 | 1.6995079 |
| LINC01140  | -1.189257 | 4.6974947 | -5.45369  | 8.28E-05 | 0.0034486 | 1.6950082 |
| FLJ31356   | -1.042723 | 2.902536  | -5.449168 | 8.34E-05 | 0.0034591 | 1.6869984 |
| CTRL       | -1.176894 | 3.9368515 | -5.446461 | 8.38E-05 | 0.0034591 | 1.6822014 |
| LOC1019296 | -1.141088 | 3.1403285 | -5.446397 | 8.39E-05 | 0.0034591 | 1.6820893 |
| DIS3       | -1.016792 | 4.1874894 | -5.444935 | 8.41E-05 | 0.0034613 | 1.6794985 |
| DHFRL1     | -1.094229 | 4.1897936 | -5.435279 | 8.56E-05 | 0.003508  | 1.6623783 |
| SPG200S    | -1.133716 | 3.8960866 | -5.430975 | 8.62E-05 | 0.0035283 | 1.6547441 |
| PAQR7      | -1.324279 | 5.8964308 | -5.425333 | 8.71E-05 | 0.0035537 | 1.6447329 |
| PIGM       | -1.00821  | 4.2380009 | -5.423689 | 8.74E-05 | 0.0035537 | 1.6418135 |
| ROR2       | -1.257081 | 3.2952986 | -5.422458 | 8.76E-05 | 0.0035537 | 1.6396281 |
| GDPD1      | -1.603718 | 5.2394517 | -5.421499 | 8.77E-05 | 0.0035537 | 1.6379254 |
| VGF        | -1.026628 | 5.9316422 | -5.417739 | 8.83E-05 | 0.0035709 | 1.6312496 |
| FGGY       | -1.128463 | 3.7850827 | -5.413405 | 8.90E-05 | 0.0035849 | 1.6235503 |
| HIST1H2BJ  | -1.09342  | 3.6779989 | -5.405321 | 9.03E-05 | 0.0036305 | 1.6091835 |
| ZFP37      | -1.015401 | 2.911714  | -5.397255 | 9.16E-05 | 0.0036762 | 1.5948405 |
| CCDC12     | -1.016329 | 7.2082679 | -5.395903 | 9.19E-05 | 0.0036762 | 1.5924354 |
| LOC1019281 | 1.1387421 | 3.8464756 | 5.3951683 | 9.20E-05 | 0.0036762 | 1.5911276 |
| LOC1019304 | -1.253961 | 3.8299287 | -5.39005  | 9.29E-05 | 0.0036809 | 1.5820204 |
| XKR4       | -1.815186 | 6.198221  | -5.388285 | 9.32E-05 | 0.0036809 | 1.5788785 |
| TRAPPC5    | -1.279553 | 6.5260338 | -5.388138 | 9.32E-05 | 0.0036809 | 1.5786162 |
| FAM71F1    | -1.059372 | 4.6872685 | -5.386842 | 9.34E-05 | 0.0036809 | 1.5763083 |
| CCDC112    | -1.741541 | 3.8615365 | -5.384793 | 9.37E-05 | 0.0036809 | 1.5726613 |
| PRR32      | -1.070891 | 4.315243  | -5.383172 | 9.40E-05 | 0.0036809 | 1.5697741 |
| GMNC       | -1.151448 | 3.0354049 | -5.382572 | 9.41E-05 | 0.0036809 | 1.5687049 |
| KRTAP7-1   | -1.223328 | 3.1589299 | -5.379931 | 9.46E-05 | 0.0036832 | 1.5640013 |
| AQP3       | -1.060765 | 4.7497143 | -5.379242 | 9.47E-05 | 0.0036832 | 1.5627743 |
| TENM2      | -1.510644 | 8.0718912 | -5.377691 | 9.50E-05 | 0.0036837 | 1.5600119 |
| TNNI3K     | -1.134625 | 2.3874898 | -5.374734 | 9.55E-05 | 0.0036897 | 1.5547425 |
| LOC1027236 | -1.295301 | 4.2955465 | -5.373939 | 9.56E-05 | 0.0036897 | 1.5533251 |
| TMEM169    | -1.860851 | 4.8742464 | -5.373061 | 9.58E-05 | 0.0036897 | 1.5517611 |
| COL15A1    | -1.098916 | 2.2538609 | -5.365068 | 9.72E-05 | 0.0037295 | 1.5375117 |
| ERBB3      | -1.242012 | 4.9518589 | -5.360381 | 9.80E-05 | 0.0037544 | 1.5291513 |

|            |           |           |           |           |           |           |
|------------|-----------|-----------|-----------|-----------|-----------|-----------|
| LINC00167  | -1.063931 | 2.8463029 | -5.353858 | 9.92E-05  | 0.003792  | 1.5175108 |
| KNCN       | -1.08852  | 3.2913381 | -5.34862  | 0.0001001 | 0.0038073 | 1.5081597 |
| KBTBD7     | -1.168776 | 3.5068843 | -5.348575 | 0.0001001 | 0.0038073 | 1.508079  |
| SCLY       | -1.175592 | 5.5057922 | -5.346077 | 0.0001006 | 0.0038175 | 1.5036176 |
| LOC1019298 | -1.067225 | 4.3540979 | -5.344756 | 0.0001008 | 0.0038196 | 1.5012581 |
| SLC45A3    | -1.110509 | 3.9229295 | -5.339347 | 0.0001018 | 0.0038502 | 1.4915955 |
| C2orf44    | -1.147172 | 4.8744212 | -5.336714 | 0.0001023 | 0.0038547 | 1.4868887 |
| PN01       | -1.305704 | 6.3430782 | -5.336595 | 0.0001023 | 0.0038547 | 1.4866777 |
| RRM1       | -1.027845 | 5.8851439 | -5.335677 | 0.0001025 | 0.0038547 | 1.4850356 |
| SLC25A46   | -1.78714  | 6.4204362 | -5.331864 | 0.0001032 | 0.0038744 | 1.4782189 |
| IL6        | 1.1162521 | 4.1756534 | 5.3292929 | 0.0001037 | 0.0038854 | 1.4736221 |
| ADAM11     | -1.179245 | 6.5608096 | -5.325413 | 0.0001044 | 0.0038916 | 1.4666823 |
| TAAR2      | -1.556015 | 3.593641  | -5.324264 | 0.0001046 | 0.0038927 | 1.4646274 |
| GGCT       | -1.617557 | 7.3939682 | -5.318537 | 0.0001057 | 0.0039263 | 1.4543785 |
| KCNK10     | -1.089586 | 4.9948481 | -5.31591  | 0.0001062 | 0.003935  | 1.4496769 |
| ACBD4      | -1.126584 | 5.8839575 | -5.307528 | 0.0001079 | 0.0039842 | 1.434666  |
| PRMT5-AS1  | -1.343964 | 4.6709773 | -5.306151 | 0.0001082 | 0.003987  | 1.4321995 |
| TMEM119    | 1.6053942 | 3.8942298 | 5.3027144 | 0.0001088 | 0.0040049 | 1.4260427 |
| PCDHB6     | -1.402485 | 4.9026471 | -5.301613 | 0.0001091 | 0.004005  | 1.424069  |
| MAZ        | -1.076813 | 6.1969525 | -5.291586 | 0.0001111 | 0.0040534 | 1.4060916 |
| THAP11     | -1.056906 | 6.7448729 | -5.291215 | 0.0001111 | 0.0040534 | 1.4054261 |
| DHRS4-AS1  | -1.078715 | 5.5968278 | -5.284751 | 0.0001125 | 0.0040942 | 1.3938302 |
| ZNF721     | -1.072423 | 7.3628684 | -5.282199 | 0.000113  | 0.0040977 | 1.3892508 |
| SLC5A11    | -1.075579 | 6.2140762 | -5.279432 | 0.0001136 | 0.0040977 | 1.3842833 |
| PRKAA2     | -1.187733 | 5.5977531 | -5.275505 | 0.0001144 | 0.0041076 | 1.3772343 |
| MBD4       | -1.35304  | 6.7370249 | -5.275169 | 0.0001144 | 0.0041076 | 1.3766307 |
| LIF        | -1.191059 | 3.4885952 | -5.274637 | 0.0001146 | 0.0041076 | 1.3756751 |
| RITA1      | -1.194643 | 4.9954837 | -5.271246 | 0.0001153 | 0.0041159 | 1.3695852 |
| AAMP       | -1.250289 | 5.8600513 | -5.265459 | 0.0001165 | 0.0041453 | 1.3591876 |
| PTBP2      | -1.340794 | 4.047567  | -5.258209 | 0.0001181 | 0.0041734 | 1.3461552 |
| ARL13B     | -1.072076 | 3.5746439 | -5.257085 | 0.0001183 | 0.0041734 | 1.3441337 |
| FOXD3-AS1  | -1.449534 | 6.9389834 | -5.25681  | 0.0001184 | 0.0041734 | 1.3436399 |
| STAC       | -1.238426 | 3.4712511 | -5.256229 | 0.0001185 | 0.0041734 | 1.3425941 |
| GIPC1      | -1.186422 | 7.6610983 | -5.256082 | 0.0001185 | 0.0041734 | 1.3423299 |
| LOC375196  | -1.078016 | 4.1008078 | -5.252754 | 0.0001192 | 0.0041799 | 1.3363439 |
| LOC101060C | -1.176217 | 3.8204161 | -5.252417 | 0.0001193 | 0.0041799 | 1.3357385 |
| FTH1P5     | -1.338807 | 9.7160715 | -5.247268 | 0.0001204 | 0.0042123 | 1.3264739 |
| LOC730098  | -1.133969 | 6.2522539 | -5.244183 | 0.0001211 | 0.0042189 | 1.320922  |
| DOCK9-AS2  | -1.104401 | 5.1327077 | -5.239007 | 0.0001223 | 0.0042331 | 1.3116035 |
| CSRP3      | -1.229367 | 4.6572377 | -5.236093 | 0.0001229 | 0.0042477 | 1.3063565 |
| LOC1002872 | -1.3581   | 3.8886827 | -5.235285 | 0.0001231 | 0.0042477 | 1.3049016 |
| ENO2       | -1.106056 | 10.964703 | -5.233689 | 0.0001235 | 0.004253  | 1.3020262 |
| LINC00936  | -1.280688 | 7.3726809 | -5.229452 | 0.0001244 | 0.0042637 | 1.294393  |
| NPHS2      | -1.19049  | 3.5705037 | -5.229275 | 0.0001245 | 0.0042637 | 1.2940743 |
| MYBBP1A    | -1.117084 | 6.5296178 | -5.227776 | 0.0001248 | 0.0042637 | 1.2913721 |
| LOC284080  | -1.044954 | 3.1374055 | -5.226084 | 0.0001252 | 0.0042696 | 1.2883234 |
| ZKSCAN3    | -1.113538 | 4.2689821 | -5.22052  | 0.0001265 | 0.0042712 | 1.2782932 |
| FAM134B    | -1.341465 | 6.3181129 | -5.217448 | 0.0001272 | 0.0042807 | 1.2727528 |
| EFCAB1     | -1.000887 | 3.9591555 | -5.214104 | 0.000128  | 0.0043    | 1.2667207 |
| LOC1019276 | -1.127742 | 4.1645673 | -5.210277 | 0.0001289 | 0.0043103 | 1.2598153 |
| LINC00403  | 1.3569385 | 3.6318909 | 5.2101255 | 0.0001289 | 0.0043103 | 1.2595426 |

|            |           |           |           |           |           |           |
|------------|-----------|-----------|-----------|-----------|-----------|-----------|
| CCPG1      | -1.356432 | 3.7680924 | -5.208656 | 0.0001293 | 0.0043149 | 1.2568914 |
| STX18-AS1  | -1.194929 | 2.8696576 | -5.206372 | 0.0001298 | 0.0043216 | 1.2527682 |
| GINS3      | -1.01681  | 4.3487093 | -5.206037 | 0.0001299 | 0.0043216 | 1.2521629 |
| RAB21      | -1.136216 | 4.0446542 | -5.202119 | 0.0001308 | 0.0043352 | 1.2450901 |
| DPF1       | -1.175017 | 6.6707713 | -5.201313 | 0.000131  | 0.0043352 | 1.2436344 |
| RWDD3      | -1.265806 | 4.9131286 | -5.200801 | 0.0001312 | 0.0043352 | 1.2427097 |
| NRGN       | -1.579992 | 10.25157  | -5.195454 | 0.0001325 | 0.0043679 | 1.2330526 |
| PLGLB2     | -1.75528  | 5.9823633 | -5.193378 | 0.000133  | 0.0043679 | 1.2293027 |
| C5orf55    | -1.111392 | 4.47388   | -5.190567 | 0.0001336 | 0.0043821 | 1.2242222 |
| DGKH       | -1.137402 | 4.9166054 | -5.185956 | 0.0001348 | 0.0044053 | 1.2158883 |
| LMO1       | -1.153976 | 4.7483721 | -5.184633 | 0.0001351 | 0.004409  | 1.2134963 |
| RNF126P1   | -1.264797 | 3.9672036 | -5.182079 | 0.0001358 | 0.0044186 | 1.2088799 |
| SPRYD3     | -1.224909 | 8.1055306 | -5.180346 | 0.0001362 | 0.0044186 | 1.2057457 |
| SPRY1      | -1.074841 | 4.6998466 | -5.179319 | 0.0001364 | 0.0044186 | 1.2038872 |
| EDRF1      | -1.031857 | 4.1359271 | -5.179136 | 0.0001365 | 0.0044186 | 1.2035567 |
| UQCRB      | -1.190873 | 7.3668925 | -5.176456 | 0.0001372 | 0.0044269 | 1.1987082 |
| C6orf57    | -1.111195 | 2.4105533 | -5.176247 | 0.0001372 | 0.0044269 | 1.1983308 |
| ZNF441     | -1.125609 | 3.0490814 | -5.166329 | 0.0001397 | 0.0044702 | 1.1803816 |
| ALLC       | -1.670756 | 4.47057   | -5.165935 | 0.0001398 | 0.0044702 | 1.1796693 |
| GLRX2      | -1.873253 | 6.8730573 | -5.165284 | 0.00014   | 0.0044702 | 1.1784902 |
| NDUFC1     | -1.388374 | 6.390571  | -5.165147 | 0.0001401 | 0.0044702 | 1.1782427 |
| KIR2DS4    | -1.509031 | 3.499561  | -5.16361  | 0.0001404 | 0.0044759 | 1.1754591 |
| SFXN1      | -1.000496 | 5.0294669 | -5.160962 | 0.0001411 | 0.0044794 | 1.1706648 |
| FAM131B    | -1.385268 | 8.704079  | -5.158846 | 0.0001417 | 0.0044874 | 1.1668306 |
| ANAPC15    | -1.346357 | 7.106796  | -5.155572 | 0.0001425 | 0.0044978 | 1.1609    |
| KLHL26     | -1.284129 | 6.5967683 | -5.150863 | 0.0001438 | 0.004519  | 1.1523664 |
| LINC01267  | 1.0158035 | 3.938177  | 5.1483946 | 0.0001444 | 0.0045301 | 1.1478929 |
| DUSP10     | -1.192535 | 4.9989192 | -5.142928 | 0.0001459 | 0.0045588 | 1.137981  |
| LOC1005056 | -1.146919 | 3.2091909 | -5.142401 | 0.000146  | 0.0045588 | 1.1370255 |
| ZNF143     | -1.571171 | 4.1764839 | -5.141955 | 0.0001462 | 0.0045588 | 1.1362164 |
| DPCR1      | -1.099871 | 3.3972714 | -5.138393 | 0.0001471 | 0.004575  | 1.1297557 |
| AREL1      | -1.228504 | 4.9422078 | -5.134811 | 0.0001481 | 0.0045903 | 1.1232562 |
| LOC1005068 | -1.072303 | 4.0102967 | -5.134116 | 0.0001483 | 0.0045903 | 1.1219953 |
| FBX040     | -1.038751 | 3.8822921 | -5.131403 | 0.000149  | 0.0045994 | 1.1170716 |
| PFKP       | -1.028119 | 6.4229844 | -5.128461 | 0.0001499 | 0.0046106 | 1.1117329 |
| TSTD1      | -1.636615 | 5.763411  | -5.121746 | 0.0001517 | 0.0046372 | 1.0995383 |
| PHKB       | -1.608025 | 5.4042943 | -5.120629 | 0.000152  | 0.0046372 | 1.0975104 |
| GDA        | -1.440538 | 6.3595044 | -5.119933 | 0.0001522 | 0.0046372 | 1.0962465 |
| NIP7       | -1.153291 | 4.0140011 | -5.117974 | 0.0001528 | 0.0046381 | 1.0926874 |
| LRRN3      | -1.478956 | 7.5064672 | -5.117468 | 0.0001529 | 0.0046381 | 1.091768  |
| ZNF334     | -1.076146 | 5.6323685 | -5.116217 | 0.0001533 | 0.0046381 | 1.0894957 |
| TRIM58     | -1.082896 | 2.9852882 | -5.115983 | 0.0001534 | 0.0046381 | 1.0890693 |
| IMMT       | -1.226255 | 6.5372528 | -5.114689 | 0.0001537 | 0.0046387 | 1.0867178 |
| DHRS2      | -1.125146 | 3.7346075 | -5.107993 | 0.0001556 | 0.0046555 | 1.0745468 |
| LOC1019295 | -1.251123 | 2.6857941 | -5.10797  | 0.0001556 | 0.0046555 | 1.0745066 |
| DHDH       | -1.458976 | 5.3281207 | -5.102683 | 0.0001572 | 0.0046808 | 1.0648918 |
| TRPV3      | -1.061036 | 3.9690578 | -5.099017 | 0.0001582 | 0.0046989 | 1.0582243 |
| RRAGB      | -1.32848  | 4.4851557 | -5.094615 | 0.0001595 | 0.0046998 | 1.0502136 |
| MPND       | -1.014237 | 5.0968121 | -5.090429 | 0.0001608 | 0.0046998 | 1.0425956 |
| TNFSF9     | -1.147705 | 6.5508535 | -5.087508 | 0.0001616 | 0.0047043 | 1.0372782 |
| EID2       | -1.731515 | 5.3945224 | -5.085392 | 0.0001623 | 0.0047043 | 1.0334238 |

|            |           |           |           |           |           |           |
|------------|-----------|-----------|-----------|-----------|-----------|-----------|
| SLC7A13    | -1.6532   | 2.4750817 | -5.084487 | 0.0001626 | 0.0047043 | 1.031777  |
| CCDC47     | -1.005491 | 6.4426195 | -5.084478 | 0.0001626 | 0.0047043 | 1.0317609 |
| SYP        | -1.198979 | 10.14352  | -5.079985 | 0.0001639 | 0.0047187 | 1.0235772 |
| LOC1019281 | -1.033548 | 3.5012114 | -5.076622 | 0.0001649 | 0.0047331 | 1.017449  |
| RWDD4      | -1.389548 | 5.3186678 | -5.069906 | 0.000167  | 0.0047538 | 1.0052094 |
| LOC1001307 | -1.199252 | 5.920369  | -5.06497  | 0.0001685 | 0.0047696 | 0.9962097 |
| FAM50B     | -1.109561 | 8.3179942 | -5.062554 | 0.0001693 | 0.0047698 | 0.9918026 |
| ZNF776     | -1.944587 | 3.9391248 | -5.055316 | 0.0001716 | 0.0048092 | 0.9785979 |
| C11orf73   | -1.351111 | 7.5853547 | -5.05118  | 0.0001729 | 0.0048396 | 0.9710491 |
| ATP5B      | -1.329536 | 9.5454887 | -5.049444 | 0.0001735 | 0.0048396 | 0.9678806 |
| NAPG       | -1.355052 | 6.3783544 | -5.049115 | 0.0001736 | 0.0048396 | 0.9672792 |
| SNRNP40    | -1.291448 | 6.2657447 | -5.048981 | 0.0001736 | 0.0048396 | 0.9670342 |
| ZMAT5      | -1.159533 | 5.062222  | -5.047454 | 0.0001741 | 0.0048417 | 0.9642462 |
| CBLN1      | -1.146074 | 3.6518421 | -5.046739 | 0.0001743 | 0.0048417 | 0.9629413 |
| HAND2      | -1.149221 | 3.365272  | -5.043953 | 0.0001753 | 0.004852  | 0.9578527 |
| MISP       | -1.210582 | 4.3857818 | -5.04191  | 0.0001759 | 0.0048572 | 0.9541215 |
| FOLR1      | -1.008797 | 3.063417  | -5.038595 | 0.000177  | 0.0048659 | 0.9480653 |
| LOC283682  | -1.170225 | 3.5265303 | -5.037964 | 0.0001772 | 0.0048659 | 0.9469137 |
| EIF2AK3    | -1.11904  | 4.1963579 | -5.037878 | 0.0001772 | 0.0048659 | 0.9467559 |
| DAW1       | -1.18714  | 3.4735956 | -5.036074 | 0.0001778 | 0.0048659 | 0.9434601 |
| LINC00939  | -1.029835 | 4.4919345 | -5.035883 | 0.0001779 | 0.0048659 | 0.9431111 |
| SOSTDC1    | -1.380957 | 4.6348223 | -5.035181 | 0.0001781 | 0.0048659 | 0.9418271 |
| APLP1      | -1.318947 | 9.3301131 | -5.034069 | 0.0001785 | 0.0048692 | 0.9397949 |
| LOC1019281 | -1.547879 | 5.1673805 | -5.02991  | 0.0001799 | 0.0048942 | 0.9321928 |
| TRMT112    | -1.08951  | 9.7781044 | -5.020414 | 0.0001831 | 0.0049682 | 0.9148278 |
| ZGRF1      | -1.209898 | 3.9144948 | -5.015968 | 0.0001846 | 0.0049947 | 0.9066932 |
| KRT37      | -1.509337 | 3.3565532 | -5.014832 | 0.000185  | 0.0049947 | 0.904614  |
| LANCL3     | -1.724719 | 3.3438055 | -5.014718 | 0.000185  | 0.0049947 | 0.9044064 |
| STEAP1     | -1.422126 | 6.0969402 | -5.013251 | 0.0001855 | 0.0050017 | 0.9017213 |
| SCOC-AS1   | -1.074176 | 3.2575481 | -5.006042 | 0.0001881 | 0.0050483 | 0.8885237 |
| CYP51A1-AS | -1.091075 | 2.9154307 | -5.003503 | 0.0001889 | 0.00506   | 0.8838734 |
| CD40LG     | -1.032898 | 4.0659408 | -4.999984 | 0.0001902 | 0.0050773 | 0.8774275 |
| C2orf80    | -2.708987 | 6.4885133 | -4.98755  | 0.0001947 | 0.0051388 | 0.8546394 |
| RPS6KA4    | -1.041997 | 3.6949717 | -4.985259 | 0.0001955 | 0.0051541 | 0.8504395 |
| ADAMTS19   | -1.408364 | 5.086033  | -4.980115 | 0.0001974 | 0.0051935 | 0.8410038 |
| ASMT       | -1.195567 | 2.7821866 | -4.979796 | 0.0001975 | 0.0051935 | 0.8404201 |
| C20orf195  | -1.057971 | 4.4835566 | -4.973331 | 0.0001999 | 0.0051983 | 0.8285577 |
| HNRNPAB    | -1.183013 | 7.2952236 | -4.97301  | 0.0002    | 0.0051983 | 0.8279686 |
| PANK3      | -1.726376 | 5.0035345 | -4.972488 | 0.0002002 | 0.0051983 | 0.8270101 |
| BAI3       | -1.370561 | 5.6950751 | -4.97039  | 0.000201  | 0.0051983 | 0.8231594 |
| COX7A2L    | -1.271293 | 8.6942336 | -4.969227 | 0.0002014 | 0.0051983 | 0.8210244 |
| RPAP3      | -1.127531 | 3.4634656 | -4.969073 | 0.0002015 | 0.0051983 | 0.8207405 |
| PET100     | -1.447575 | 9.6659298 | -4.96505  | 0.000203  | 0.0052293 | 0.8133547 |
| LINC00853  | -1.007655 | 3.4797858 | -4.962674 | 0.0002039 | 0.0052298 | 0.8089906 |
| LINC00165  | -1.303954 | 4.4067747 | -4.954445 | 0.0002071 | 0.0052824 | 0.7938746 |
| PPP1R36    | -1.098629 | 4.2376028 | -4.951688 | 0.0002081 | 0.005296  | 0.7888079 |
| EMB        | -1.14048  | 3.5797743 | -4.951068 | 0.0002084 | 0.005296  | 0.7876683 |
| ESPNL      | -1.126857 | 5.7165327 | -4.948891 | 0.0002092 | 0.005311  | 0.7836667 |
| LAX1       | -1.421409 | 3.1424453 | -4.94406  | 0.0002111 | 0.0053328 | 0.774784  |
| AIFM1      | -1.392585 | 7.0629821 | -4.939443 | 0.000213  | 0.0053601 | 0.7662927 |
| HTR1E      | -1.149542 | 4.9908821 | -4.938973 | 0.0002131 | 0.0053601 | 0.7654265 |

|            |           |           |           |           |           |           |
|------------|-----------|-----------|-----------|-----------|-----------|-----------|
| SLC35A3    | -1.016209 | 3.530037  | -4.936404 | 0.0002142 | 0.0053634 | 0.7607006 |
| TMEM194B   | -1.53507  | 6.4804143 | -4.933202 | 0.0002155 | 0.0053739 | 0.7548091 |
| LOC283737  | -1.378434 | 3.5921727 | -4.932159 | 0.0002159 | 0.0053739 | 0.75289   |
| HINT1      | -1.067898 | 7.6728756 | -4.931597 | 0.0002161 | 0.0053739 | 0.751855  |
| TRIM9      | -1.539672 | 6.994711  | -4.926323 | 0.0002182 | 0.0054125 | 0.742147  |
| RAB4B      | -1.000744 | 4.1471655 | -4.918337 | 0.0002215 | 0.0054482 | 0.72744   |
| NDUFA4     | -1.471514 | 10.54011  | -4.913025 | 0.0002238 | 0.0054896 | 0.7176528 |
| SATB2-AS1  | -1.021769 | 4.2325274 | -4.912989 | 0.0002238 | 0.0054896 | 0.7175874 |
| SET        | -1.596185 | 8.428527  | -4.910665 | 0.0002247 | 0.0055004 | 0.7133044 |
| LOC101927C | -1.217233 | 5.0447203 | -4.909437 | 0.0002253 | 0.0055064 | 0.7110412 |
| LOC1005061 | -1.074453 | 4.7155774 | -4.907185 | 0.0002262 | 0.0055124 | 0.7068902 |
| C5orf15    | -1.029503 | 5.0986713 | -4.901439 | 0.0002287 | 0.0055631 | 0.6962962 |
| CHCHD1     | -1.157429 | 6.2194675 | -4.899425 | 0.0002295 | 0.0055709 | 0.6925804 |
| Clorf94    | -1.273688 | 4.3986257 | -4.895187 | 0.0002314 | 0.0056032 | 0.6847638 |
| HSDL1      | -1.593514 | 6.0537068 | -4.894553 | 0.0002316 | 0.0056032 | 0.6835944 |
| NHEG1      | -1.477979 | 3.0872792 | -4.893194 | 0.0002322 | 0.0056032 | 0.6810859 |
| PRSS3P2    | -1.063486 | 6.6580381 | -4.891027 | 0.0002332 | 0.0056032 | 0.677088  |
| FLJ41455   | -1.240466 | 2.7061642 | -4.890783 | 0.0002333 | 0.0056032 | 0.6766378 |
| LOC1009962 | -1.002626 | 5.5766634 | -4.890667 | 0.0002333 | 0.0056032 | 0.6764225 |
| LOC151657  | -1.098381 | 4.9679267 | -4.889451 | 0.0002339 | 0.0056032 | 0.6741785 |
| MED10      | -1.19915  | 6.9779941 | -4.888281 | 0.0002344 | 0.0056032 | 0.6720197 |
| LINC00685  | -1.138393 | 3.7996894 | -4.888132 | 0.0002345 | 0.0056032 | 0.6717447 |
| KERA       | 1.2866597 | 3.7404232 | 4.8809713 | 0.0002376 | 0.0056331 | 0.6585245 |
| NUDT16L1   | -1.20224  | 6.1902581 | -4.879898 | 0.0002381 | 0.0056331 | 0.6565429 |
| PSG1       | -1.062348 | 4.1896139 | -4.879383 | 0.0002383 | 0.0056331 | 0.655592  |
| MOGS       | -1.324204 | 5.4476934 | -4.879172 | 0.0002384 | 0.0056331 | 0.6552021 |
| ZG16       | -1.239819 | 4.4456401 | -4.875355 | 0.0002401 | 0.0056334 | 0.6481508 |
| ALG14      | -1.316773 | 5.2776155 | -4.875173 | 0.0002402 | 0.0056334 | 0.6478146 |
| LOC400768  | -1.144802 | 3.6810974 | -4.875131 | 0.0002402 | 0.0056334 | 0.6477374 |
| ATP6VOC    | -1.065679 | 7.504916  | -4.873354 | 0.000241  | 0.0056334 | 0.6444541 |
| SLC35D3    | -1.051089 | 2.6414695 | -4.87052  | 0.0002423 | 0.0056514 | 0.6392187 |
| TAF3       | -1.058922 | 5.0960996 | -4.870124 | 0.0002425 | 0.0056514 | 0.6384869 |
| ATP6V1E1   | -1.049814 | 10.096879 | -4.867657 | 0.0002436 | 0.0056647 | 0.6339276 |
| SOX21      | -1.142601 | 3.9364183 | -4.866568 | 0.0002441 | 0.0056699 | 0.6319154 |
| ABCA3      | -1.140894 | 8.0161532 | -4.865921 | 0.0002444 | 0.0056704 | 0.630718  |
| OTUD6B     | -1.874089 | 3.5658849 | -4.86457  | 0.0002451 | 0.0056735 | 0.6282221 |
| PARD6A     | -1.041281 | 6.9381811 | -4.864422 | 0.0002451 | 0.0056735 | 0.6279472 |
| H2AFY2     | -1.396025 | 6.1738787 | -4.861729 | 0.0002464 | 0.0056894 | 0.6229687 |
| DZIP3      | -1.346385 | 6.360879  | -4.853988 | 0.00025   | 0.0057276 | 0.6086524 |
| C16orf46   | -1.141415 | 5.4417168 | -4.851936 | 0.000251  | 0.0057324 | 0.6048567 |
| OGDH       | -1.011048 | 5.709723  | -4.849983 | 0.0002519 | 0.0057324 | 0.6012436 |
| LEMD3      | -1.234002 | 8.0039601 | -4.848306 | 0.0002527 | 0.0057399 | 0.5981408 |
| HMP19      | -1.309038 | 8.633537  | -4.848111 | 0.0002528 | 0.0057399 | 0.5977787 |
| RAD51-AS1  | -1.048275 | 5.5740574 | -4.846304 | 0.0002536 | 0.0057531 | 0.5944345 |
| RRS1       | -1.178927 | 6.9571155 | -4.840064 | 0.0002566 | 0.0058001 | 0.5828846 |
| CDKN1C     | -1.06663  | 5.4298777 | -4.839518 | 0.0002569 | 0.0058001 | 0.5818734 |
| LOC440570  | -1.297647 | 4.1271837 | -4.839044 | 0.0002571 | 0.0058001 | 0.5809958 |
| NAB2       | -1.096084 | 6.8273041 | -4.831249 | 0.0002609 | 0.0058474 | 0.5665583 |
| PTH1R      | -1.082433 | 5.6739472 | -4.830877 | 0.0002611 | 0.0058474 | 0.5658693 |
| TTPAL      | -1.019177 | 6.3455799 | -4.825179 | 0.0002639 | 0.0058952 | 0.5553105 |
| SLC4A2     | -1.083501 | 6.0194327 | -4.823273 | 0.0002649 | 0.0059099 | 0.5517778 |

|            |           |           |           |           |           |           |
|------------|-----------|-----------|-----------|-----------|-----------|-----------|
| C14orf2    | -1.369945 | 9.449336  | -4.814662 | 0.0002692 | 0.0059936 | 0.5358141 |
| AGA        | -1.171821 | 4.9726037 | -4.813193 | 0.00027   | 0.0060025 | 0.5330886 |
| PRMT8      | -1.22625  | 6.1519835 | -4.807341 | 0.000273  | 0.0060506 | 0.522233  |
| KRTAP19-3  | -1.05691  | 3.2474571 | -4.804802 | 0.0002743 | 0.0060731 | 0.5175213 |
| TSPAN7     | -1.342653 | 9.6800272 | -4.801812 | 0.0002758 | 0.0060943 | 0.511973  |
| QPCT       | -2.033401 | 5.1747502 | -4.798435 | 0.0002776 | 0.0061087 | 0.5057043 |
| LOC150051  | -1.064007 | 3.4443007 | -4.797305 | 0.0002782 | 0.0061105 | 0.5036069 |
| HLTF       | -1.420934 | 6.7624508 | -4.796968 | 0.0002784 | 0.0061105 | 0.5029811 |
| TM4SF4     | -1.306949 | 3.2464188 | -4.795284 | 0.0002792 | 0.0061105 | 0.4998538 |
| CENPF      | -1.110229 | 3.8725621 | -4.790741 | 0.0002817 | 0.0061369 | 0.4914178 |
| EPS8L3     | -1.484766 | 3.8223041 | -4.785435 | 0.0002845 | 0.0061655 | 0.4815609 |
| KCNS3      | -1.275418 | 5.4979427 | -4.784353 | 0.0002851 | 0.0061655 | 0.4795519 |
| VSIG1      | -1.000048 | 4.1305089 | -4.781207 | 0.0002868 | 0.0061892 | 0.4737045 |
| CAAP1      | -1.218981 | 4.7996028 | -4.780148 | 0.0002873 | 0.0061951 | 0.4717369 |
| TMEM35     | -1.685831 | 4.0109161 | -4.779233 | 0.0002878 | 0.0061958 | 0.4700358 |
| IFI6       | -1.456949 | 8.528519  | -4.778416 | 0.0002883 | 0.0061958 | 0.4685177 |
| FLJ41170   | -1.115519 | 5.0125404 | -4.774352 | 0.0002905 | 0.006224  | 0.4609628 |
| NRG3       | -1.288958 | 7.5017095 | -4.771539 | 0.0002921 | 0.0062311 | 0.4557332 |
| LMBRD2     | -1.088694 | 5.4875068 | -4.769835 | 0.000293  | 0.0062447 | 0.452563  |
| PHAX       | -1.3341   | 5.8376332 | -4.766189 | 0.000295  | 0.0062483 | 0.4457819 |
| LOC1019285 | -1.011319 | 3.1487079 | -4.765718 | 0.0002953 | 0.0062483 | 0.4449055 |
| WDR54      | -1.195641 | 6.9287573 | -4.765625 | 0.0002953 | 0.0062483 | 0.4447341 |
| FDFT1      | -1.004439 | 7.5347431 | -4.765609 | 0.0002954 | 0.0062483 | 0.4447037 |
| FARSB      | -1.14451  | 4.9841753 | -4.764871 | 0.0002958 | 0.0062483 | 0.44333   |
| NDRG1      | -1.404876 | 8.6926195 | -4.760824 | 0.000298  | 0.0062801 | 0.4358007 |
| ENY2       | -1.042441 | 6.4007409 | -4.759021 | 0.0002991 | 0.0062951 | 0.4324452 |
| CEL        | -1.050581 | 2.5444058 | -4.756421 | 0.0003005 | 0.0063197 | 0.4276064 |
| SVIP       | -1.242709 | 5.8653014 | -4.753493 | 0.0003022 | 0.0063463 | 0.4221568 |
| WDYHV1     | -1.30288  | 3.6613012 | -4.752312 | 0.0003029 | 0.0063463 | 0.4199581 |
| CTSA       | -1.115621 | 8.1116693 | -4.748276 | 0.0003052 | 0.0063591 | 0.4124436 |
| FLJ34503   | -1.391591 | 2.8462784 | -4.741561 | 0.0003091 | 0.0064079 | 0.3999358 |
| DGKB       | -1.050864 | 5.9921192 | -4.72937  | 0.0003163 | 0.0065057 | 0.3772156 |
| SLM01      | -1.121953 | 4.0352161 | -4.724016 | 0.0003196 | 0.0065295 | 0.3672324 |
| SPTY2D1    | -1.168322 | 3.3673988 | -4.719702 | 0.0003222 | 0.0065641 | 0.3591872 |
| CYP4X1     | -1.37022  | 6.6217051 | -4.713745 | 0.0003259 | 0.0065893 | 0.3480736 |
| KLHL3      | -1.074099 | 7.4148228 | -4.711752 | 0.0003271 | 0.0066001 | 0.3443531 |
| LOC283856  | -1.074705 | 3.5355943 | -4.709495 | 0.0003285 | 0.0066219 | 0.3401403 |
| LOC101928C | -1.422991 | 4.0616477 | -4.707758 | 0.0003296 | 0.0066226 | 0.3368982 |
| MRPL24     | -1.052844 | 6.9373218 | -4.707309 | 0.0003299 | 0.0066226 | 0.3360606 |
| KIFC2      | -1.037975 | 8.1861019 | -4.706893 | 0.0003301 | 0.0066226 | 0.3352845 |
| WDR5       | -1.015082 | 5.9893687 | -4.701221 | 0.0003337 | 0.0066555 | 0.3246923 |
| DUSP21     | -1.146168 | 3.3875745 | -4.699944 | 0.0003345 | 0.0066625 | 0.3223091 |
| LOC440416  | -1.076156 | 3.6045311 | -4.689249 | 0.0003414 | 0.0067522 | 0.3023287 |
| NME9       | -1.506836 | 3.9740472 | -4.685965 | 0.0003435 | 0.0067778 | 0.2961911 |
| CYP8B1     | -1.031246 | 3.8381533 | -4.675864 | 0.0003502 | 0.0068771 | 0.2773038 |
| SLC2A3     | -1.274939 | 6.9424394 | -4.675288 | 0.0003506 | 0.0068771 | 0.2762272 |
| COL21A1    | -2.223061 | 3.9762236 | -4.667251 | 0.000356  | 0.0069626 | 0.2611911 |
| TUBBP5     | -1.084092 | 3.6860193 | -4.666791 | 0.0003563 | 0.0069626 | 0.2603311 |
| BRCC3      | -1.06714  | 5.4605432 | -4.663389 | 0.0003586 | 0.0069745 | 0.2539644 |
| LOC441081  | -1.751958 | 5.9909735 | -4.660371 | 0.0003607 | 0.0069954 | 0.2483159 |
| IL1F10     | -1.007622 | 3.5062813 | -4.659899 | 0.000361  | 0.0069954 | 0.2474309 |

|            |           |           |           |           |           |           |
|------------|-----------|-----------|-----------|-----------|-----------|-----------|
| PEBP4      | -1.334923 | 4.6418164 | -4.659825 | 0.0003611 | 0.0069954 | 0.2472934 |
| IMP3       | -1.069391 | 6.947743  | -4.65462  | 0.0003647 | 0.0070451 | 0.2375485 |
| KBTBD8     | -1.034253 | 3.5370494 | -4.65282  | 0.0003659 | 0.0070546 | 0.2341778 |
| YWHAZ      | -1.360234 | 8.364756  | -4.652424 | 0.0003662 | 0.0070546 | 0.2334352 |
| TTI1       | -1.728486 | 5.002529  | -4.651905 | 0.0003665 | 0.007055  | 0.232463  |
| AZIN2      | -1.305076 | 7.6034938 | -4.650759 | 0.0003673 | 0.0070628 | 0.2303165 |
| TERF1      | -1.136591 | 7.0306475 | -4.650337 | 0.0003676 | 0.0070628 | 0.2295267 |
| DDX55      | -1.375667 | 4.7228757 | -4.648507 | 0.0003689 | 0.0070742 | 0.2260991 |
| SP2        | -1.099917 | 4.0459459 | -4.646898 | 0.0003701 | 0.007076  | 0.2230835 |
| LOC1005068 | -1.020293 | 3.1588401 | -4.640406 | 0.0003747 | 0.0071375 | 0.2109207 |
| LRRK2      | -1.070348 | 4.6083405 | -4.639392 | 0.0003754 | 0.0071434 | 0.2090187 |
| SMIM6      | -1.371626 | 4.3202601 | -4.638793 | 0.0003758 | 0.0071434 | 0.2078974 |
| MAB21L2    | -1.100232 | 4.3266595 | -4.633676 | 0.0003795 | 0.0071805 | 0.1983047 |
| MCTP1      | -1.7049   | 5.1406239 | -4.633391 | 0.0003797 | 0.0071805 | 0.1977714 |
| CCDC81     | -1.241495 | 4.5443538 | -4.632274 | 0.0003805 | 0.0071805 | 0.1956756 |
| STX3       | -1.367457 | 5.6027503 | -4.631028 | 0.0003814 | 0.0071805 | 0.1933405 |
| SENP6      | -1.057298 | 4.754706  | -4.630666 | 0.0003817 | 0.0071805 | 0.192662  |
| SH2D1B     | -1.174156 | 4.0765383 | -4.630097 | 0.0003821 | 0.0071805 | 0.1915948 |
| PAXIP1     | -1.456485 | 4.8477911 | -4.629984 | 0.0003822 | 0.0071805 | 0.1913825 |
| TBC1D25    | -1.163062 | 5.5517409 | -4.628799 | 0.0003831 | 0.0071902 | 0.1891597 |
| MPDZ       | -1.032588 | 7.7562605 | -4.624769 | 0.000386  | 0.0072288 | 0.1816024 |
| EXTL1      | -1.138561 | 6.0375657 | -4.623079 | 0.0003873 | 0.0072342 | 0.1784317 |
| MIS12      | -1.305419 | 4.4093655 | -4.622311 | 0.0003878 | 0.0072342 | 0.1769907 |
| C3orf62    | -1.061382 | 3.2554428 | -4.621843 | 0.0003882 | 0.0072342 | 0.1761126 |
| SLC25A43   | -1.063071 | 2.4841504 | -4.621774 | 0.0003882 | 0.0072342 | 0.1759825 |
| GNB4       | -1.004298 | 5.0614605 | -4.620571 | 0.0003891 | 0.0072342 | 0.1737268 |
| NFYB       | -1.042342 | 4.2315272 | -4.615374 | 0.000393  | 0.0072814 | 0.1639736 |
| AHNAK2     | -1.103421 | 6.8136287 | -4.615038 | 0.0003933 | 0.0072814 | 0.1633433 |
| DUSP13     | -1.148011 | 3.5187469 | -4.613464 | 0.0003944 | 0.0072835 | 0.1603896 |
| SOX5       | -1.058932 | 6.0703605 | -4.608331 | 0.0003983 | 0.0073216 | 0.1507533 |
| RAP2C      | -1.210929 | 4.6660818 | -4.607909 | 0.0003986 | 0.0073216 | 0.1499616 |
| LOC101928C | -1.389558 | 3.8063115 | -4.606223 | 0.0003999 | 0.0073223 | 0.1467961 |
| PCDHAC1    | -1.265442 | 4.6394035 | -4.598004 | 0.0004063 | 0.0073951 | 0.1313592 |
| RNF138     | -1.504157 | 5.0398165 | -4.597301 | 0.0004068 | 0.0073984 | 0.1300388 |
| BABAM1     | -1.286904 | 7.3647288 | -4.595696 | 0.0004081 | 0.0074146 | 0.1270225 |
| GBGT1      | -1.198618 | 4.8494075 | -4.58939  | 0.000413  | 0.0074516 | 0.1151726 |
| SLC50A1    | -1.033442 | 5.9551315 | -4.587746 | 0.0004143 | 0.0074586 | 0.1120825 |
| LINC01069  | -1.128036 | 3.3347557 | -4.585139 | 0.0004164 | 0.0074586 | 0.1071812 |
| GRAMD1C    | -1.102424 | 3.3153696 | -4.584682 | 0.0004167 | 0.0074586 | 0.106322  |
| PAPSS1     | -1.020751 | 8.0026136 | -4.584173 | 0.0004172 | 0.0074586 | 0.1053656 |
| DEPDC7     | -1.224899 | 2.3795667 | -4.581658 | 0.0004192 | 0.0074586 | 0.1006368 |
| MAP1B      | -1.010545 | 10.427563 | -4.581578 | 0.0004192 | 0.0074586 | 0.1004865 |
| PRPF19     | -1.147569 | 7.6250696 | -4.580091 | 0.0004204 | 0.0074668 | 0.0976912 |
| NXNL1      | -1.033459 | 5.7332917 | -4.57924  | 0.0004211 | 0.0074725 | 0.0960906 |
| LOC100507C | -1.252455 | 4.5045458 | -4.578227 | 0.0004219 | 0.0074805 | 0.0941854 |
| C17orf100  | -1.415834 | 4.8287031 | -4.571074 | 0.0004277 | 0.007538  | 0.0807297 |
| ZFAT       | -1.158771 | 5.3972799 | -4.570596 | 0.0004281 | 0.0075384 | 0.0798304 |
| GPR155     | -1.300498 | 5.7847414 | -4.569119 | 0.0004293 | 0.0075467 | 0.0770515 |
| CTC-338M12 | -1.131082 | 3.9453068 | -4.566717 | 0.0004313 | 0.0075594 | 0.0725332 |
| PVRIG      | -1.053385 | 4.0497004 | -4.565008 | 0.0004327 | 0.0075594 | 0.0693158 |
| HCN3       | -1.134848 | 5.8683131 | -4.564384 | 0.0004333 | 0.0075594 | 0.0681411 |

|            |           |           |           |           |           |           |
|------------|-----------|-----------|-----------|-----------|-----------|-----------|
| ARRDC3-AS1 | -1.14758  | 4.233391  | -4.560849 | 0.0004362 | 0.0075792 | 0.0614878 |
| SPAG16     | -1.021547 | 3.8939631 | -4.558102 | 0.0004385 | 0.0076052 | 0.0563159 |
| CYP27C1    | -1.007116 | 2.5146348 | -4.557963 | 0.0004386 | 0.0076052 | 0.0560556 |
| DUSP2      | -1.205442 | 5.5042131 | -4.556154 | 0.0004401 | 0.0076252 | 0.0526483 |
| C15orf32   | -1.010594 | 3.4751768 | -4.553054 | 0.0004428 | 0.0076576 | 0.0468118 |
| TUSC8      | -1.239681 | 3.728501  | -4.551267 | 0.0004443 | 0.0076709 | 0.0434468 |
| LINC00208  | -1.020739 | 4.3152246 | -4.549375 | 0.0004459 | 0.007685  | 0.039882  |
| KBTBD12    | -1.31596  | 4.7582183 | -4.548992 | 0.0004462 | 0.007685  | 0.0391608 |
| PRKCB      | -1.086413 | 8.3017597 | -4.545643 | 0.0004491 | 0.0077075 | 0.0328524 |
| ZFP1       | -1.012658 | 4.7843815 | -4.540513 | 0.0004535 | 0.0077495 | 0.0231864 |
| HMCES      | -1.002793 | 5.7213305 | -4.539985 | 0.000454  | 0.0077495 | 0.0221904 |
| PEX12      | -1.106992 | 3.7403195 | -4.537506 | 0.0004562 | 0.0077528 | 0.0175182 |
| LOC1005071 | -1.378987 | 3.4819466 | -4.537407 | 0.0004563 | 0.0077528 | 0.0173318 |
| COMMD1     | -1.008796 | 7.9772875 | -4.537084 | 0.0004565 | 0.0077528 | 0.0167231 |
| CCM2       | -1.260013 | 6.4890096 | -4.535756 | 0.0004577 | 0.0077528 | 0.0142198 |
| WDR66      | -1.081698 | 4.5042215 | -4.533649 | 0.0004596 | 0.0077706 | 0.0102494 |
| LOC1027253 | -1.069059 | 4.7393398 | -4.521648 | 0.0004703 | 0.0078999 | -0.012383 |
| SRD5A3     | -1.14031  | 4.8807178 | -4.517457 | 0.0004741 | 0.0079372 | -0.020289 |
| LDLRAD4    | -1.051735 | 6.2468059 | -4.515471 | 0.0004759 | 0.0079454 | -0.024036 |
| PPL        | -1.300026 | 6.805219  | -4.511872 | 0.0004792 | 0.0079837 | -0.030828 |
| ITPK1-AS1  | -1.039866 | 3.8739774 | -4.507757 | 0.000483  | 0.0080183 | -0.038596 |
| LARGE      | -1.390675 | 6.1132961 | -4.507504 | 0.0004832 | 0.0080183 | -0.039072 |
| HS3ST6     | -1.043661 | 4.5559242 | -4.504351 | 0.0004862 | 0.0080516 | -0.045026 |
| ALOX12B    | -1.437272 | 3.8284585 | -4.5006   | 0.0004897 | 0.0080796 | -0.05211  |
| USP27X-AS1 | -1.194518 | 3.7959307 | -4.498986 | 0.0004912 | 0.0080916 | -0.055157 |
| ANKRD20A5F | -1.168863 | 3.6640985 | -4.494316 | 0.0004956 | 0.0081243 | -0.063978 |
| CASQ1      | -1.52737  | 4.0153615 | -4.494078 | 0.0004958 | 0.0081243 | -0.064427 |
| PHF11      | -1.074071 | 4.3285478 | -4.493552 | 0.0004964 | 0.0081243 | -0.065422 |
| KLHDC1     | -1.06678  | 3.0236321 | -4.489383 | 0.0005003 | 0.0081687 | -0.073298 |
| CAPNS2     | -1.086925 | 3.2075531 | -4.487292 | 0.0005024 | 0.0081769 | -0.077249 |
| TOLLIP-AS1 | -1.196387 | 4.2200621 | -4.48548  | 0.0005041 | 0.0081924 | -0.080673 |
| LSM4       | -1.028775 | 7.5648773 | -4.484553 | 0.000505  | 0.0082005 | -0.082426 |
| ARL2       | -1.113329 | 7.5274235 | -4.481123 | 0.0005084 | 0.0082418 | -0.088908 |
| C4orf29    | -1.003494 | 4.4019201 | -4.478372 | 0.0005111 | 0.0082559 | -0.094109 |
| ARMC10     | -1.267166 | 6.9018619 | -4.477766 | 0.0005117 | 0.0082559 | -0.095254 |
| ZNF512     | -1.164607 | 7.0553653 | -4.475413 | 0.000514  | 0.008278  | -0.099703 |
| LPAR4      | 1.2529139 | 3.8892088 | 4.4749686 | 0.0005144 | 0.008278  | -0.100544 |
| SFMBT1     | -1.080341 | 4.9103224 | -4.47429  | 0.0005151 | 0.008278  | -0.101827 |
| KCTD18     | -1.045794 | 5.0305759 | -4.469216 | 0.0005202 | 0.0083078 | -0.111423 |
| LINC00343  | -1.057815 | 2.4615439 | -4.467338 | 0.000522  | 0.0083314 | -0.114976 |
| HRAS       | -1.062286 | 6.8448158 | -4.466476 | 0.0005229 | 0.0083362 | -0.116605 |
| LOC1019292 | -1.358101 | 3.4530963 | -4.460991 | 0.0005285 | 0.0083881 | -0.126984 |
| NDUFAF2    | -1.289975 | 7.1574905 | -4.458405 | 0.0005311 | 0.0084098 | -0.131878 |
| FER1L6-AS1 | 1.4068634 | 3.5712728 | 4.4538689 | 0.0005358 | 0.0084469 | -0.140463 |
| MYRIP      | -1.175531 | 5.3563642 | -4.447706 | 0.0005422 | 0.0085328 | -0.15213  |
| BOD1       | -1.261483 | 6.8310684 | -4.444825 | 0.0005452 | 0.0085475 | -0.157586 |
| MMP2       | -1.066937 | 4.0630004 | -4.441109 | 0.0005491 | 0.0085826 | -0.164623 |
| LOC1005065 | -1.334809 | 5.4830818 | -4.438088 | 0.0005523 | 0.0086197 | -0.170347 |
| NDUFS6     | -1.012766 | 9.7048551 | -4.429988 | 0.000561  | 0.0087222 | -0.185694 |
| LOC1005075 | -1.133976 | 4.0212337 | -4.42698  | 0.0005643 | 0.0087663 | -0.191395 |
| MDH1B      | -1.347831 | 4.6950948 | -4.424323 | 0.0005672 | 0.0087821 | -0.196433 |



|            |           |           |           |           |           |           |
|------------|-----------|-----------|-----------|-----------|-----------|-----------|
| SERPINA3   | 2.755891  | 6.0762453 | 4.4240987 | 0.0005674 | 0.0087821 | -0.196857 |
| SELT       | -1.021903 | 8.7771887 | -4.423921 | 0.0005676 | 0.0087821 | -0.197193 |
| SFR1       | -1.128779 | 3.7350883 | -4.423672 | 0.0005679 | 0.0087821 | -0.197665 |
| TIMM10B    | -1.00365  | 7.2643238 | -4.423054 | 0.0005686 | 0.0087821 | -0.198836 |
| SCCPDH     | -1.112313 | 7.5638998 | -4.421336 | 0.0005705 | 0.0087955 | -0.202094 |
| LRRC46     | -1.012232 | 3.6802183 | -4.420169 | 0.0005718 | 0.0088017 | -0.204307 |
| INSM2      | -1.163737 | 5.8251433 | -4.419207 | 0.0005728 | 0.0088052 | -0.206131 |
| LINC00309  | -1.740774 | 3.4884805 | -4.41864  | 0.0005734 | 0.0088083 | -0.207206 |
| LOC1019269 | -1.051209 | 2.8478783 | -4.414971 | 0.0005775 | 0.0088429 | -0.214164 |
| SGPP2      | -1.578305 | 6.0690498 | -4.41467  | 0.0005779 | 0.0088429 | -0.214735 |
| TMEM115    | -1.145148 | 6.5020804 | -4.408173 | 0.0005852 | 0.0089311 | -0.227059 |
| OCR1       | -1.457573 | 4.6760355 | -4.407983 | 0.0005854 | 0.0089311 | -0.227418 |
| B3GNT4     | -1.115826 | 4.8206618 | -4.405928 | 0.0005877 | 0.0089533 | -0.231319 |
| CCDC91     | -1.273898 | 4.06069   | -4.404786 | 0.000589  | 0.0089664 | -0.233484 |
| KRT17P5    | -1.105091 | 3.2905233 | -4.40289  | 0.0005912 | 0.0089793 | -0.237083 |
| PLA2G7     | 1.3277622 | 5.7078277 | 4.4006175 | 0.0005938 | 0.0090054 | -0.241395 |
| RNF166     | -1.318279 | 4.6410696 | -4.397913 | 0.0005969 | 0.0090325 | -0.246527 |
| ZNF808     | -1.437587 | 7.2351572 | -4.396936 | 0.000598  | 0.0090429 | -0.248382 |
| FAM151A    | -1.104692 | 3.4827291 | -4.395497 | 0.0005997 | 0.0090548 | -0.251115 |
| ISOC1      | -1.495282 | 4.3866738 | -4.377049 | 0.0006215 | 0.0092785 | -0.286149 |
| ZNF639     | -1.027912 | 4.6263103 | -4.376536 | 0.0006221 | 0.0092785 | -0.287123 |
| DLEU1      | -1.019024 | 4.0698202 | -4.376327 | 0.0006223 | 0.0092785 | -0.287519 |
| LINC00330  | -1.010493 | 3.1142802 | -4.371107 | 0.0006286 | 0.0093271 | -0.29744  |
| TMEM235    | -1.476177 | 4.9249896 | -4.370536 | 0.0006293 | 0.0093306 | -0.298524 |
| LPP-AS2    | -1.003482 | 2.5221642 | -4.368194 | 0.0006322 | 0.0093383 | -0.302975 |
| HPCA       | -1.099787 | 7.5782522 | -4.367872 | 0.0006326 | 0.0093383 | -0.303587 |
| DPEP1      | -1.082633 | 5.8005146 | -4.3616   | 0.0006403 | 0.0094283 | -0.31551  |
| PRKAB2     | -1.04269  | 5.6950131 | -4.360644 | 0.0006415 | 0.0094352 | -0.317328 |
| LOC1005058 | -1.013663 | 4.1371316 | -4.360081 | 0.0006422 | 0.0094352 | -0.318399 |
| CNIH2      | -1.106218 | 5.0725265 | -4.359939 | 0.0006424 | 0.0094352 | -0.318669 |
| OLFM2      | -1.223316 | 6.8614103 | -4.353089 | 0.000651  | 0.0095043 | -0.331695 |
| GALNT11    | -1.079551 | 8.9634068 | -4.346964 | 0.0006587 | 0.0095723 | -0.343346 |
| NTNG2      | -1.341087 | 8.4235578 | -4.344206 | 0.0006623 | 0.0095761 | -0.348595 |
| PGRMC1     | -1.061014 | 7.4828185 | -4.344205 | 0.0006623 | 0.0095761 | -0.348597 |
| PWP2       | -1.069369 | 5.4338096 | -4.342775 | 0.0006641 | 0.0095823 | -0.351318 |
| DCTN3      | -1.156287 | 8.2201103 | -4.340683 | 0.0006668 | 0.0096145 | -0.355298 |
| RPRML      | -1.344084 | 7.5544668 | -4.340005 | 0.0006677 | 0.0096204 | -0.356588 |
| JAKMIP2-AS | -1.043183 | 3.3598352 | -4.33938  | 0.0006685 | 0.0096253 | -0.357779 |
| RAD54B     | -1.009194 | 4.8775095 | -4.338326 | 0.0006699 | 0.0096382 | -0.359784 |
| DCSTAMP    | -1.045067 | 4.7255872 | -4.337844 | 0.0006705 | 0.0096404 | -0.360702 |
| MANSC1     | -1.338842 | 6.7291302 | -4.334443 | 0.0006749 | 0.0096726 | -0.367175 |
| PGAM1      | -1.152091 | 9.8360414 | -4.333988 | 0.0006755 | 0.0096726 | -0.368041 |
| GRIN3A     | -1.147099 | 5.2260086 | -4.330539 | 0.0006801 | 0.0096968 | -0.374608 |
| LOC1005075 | -1.491463 | 2.8018486 | -4.330022 | 0.0006807 | 0.0096992 | -0.375592 |
| ZC2HC1B    | -1.248179 | 4.0638692 | -4.328876 | 0.0006823 | 0.0097073 | -0.377774 |
| RPP30      | -1.031978 | 4.554689  | -4.328417 | 0.0006829 | 0.0097092 | -0.378648 |
| IGLL3P     | -1.063934 | 6.0547416 | -4.326476 | 0.0006854 | 0.009724  | -0.382344 |
| ILF2       | -1.562423 | 5.458117  | -4.324007 | 0.0006887 | 0.009746  | -0.387046 |
| RSPH9      | -1.026469 | 3.9379451 | -4.323419 | 0.0006895 | 0.0097496 | -0.388166 |
| TTC33      | -1.089155 | 5.9518006 | -4.320542 | 0.0006934 | 0.0097577 | -0.393646 |
| TCHH       | -1.267128 | 3.5219771 | -4.320496 | 0.0006934 | 0.0097577 | -0.393733 |

|            |           |           |           |           |           |           |
|------------|-----------|-----------|-----------|-----------|-----------|-----------|
| RPGR       | -2.064258 | 6.5318152 | -4.31934  | 0.000695  | 0.0097577 | -0.395935 |
| SOHLH2     | -1.550341 | 3.3477932 | -4.318823 | 0.0006957 | 0.0097577 | -0.39692  |
| MRGPRX4    | -1.153625 | 3.9144647 | -4.318237 | 0.0006965 | 0.0097577 | -0.398037 |
| ANKRD33B   | -1.16131  | 7.5719025 | -4.316398 | 0.000699  | 0.0097577 | -0.401539 |
| LSM7       | -1.307575 | 6.8203548 | -4.316007 | 0.0006995 | 0.0097577 | -0.402284 |
| HS3ST4     | -1.011002 | 8.3293676 | -4.315469 | 0.0007002 | 0.0097577 | -0.40331  |
| PRO2949    | -1.093719 | 3.0679757 | -4.315277 | 0.0007005 | 0.0097577 | -0.403674 |
| ITGAE      | -1.441191 | 6.3421772 | -4.315094 | 0.0007008 | 0.0097577 | -0.404023 |
| TREML5P    | -1.283308 | 4.1317742 | -4.314864 | 0.0007011 | 0.0097577 | -0.404463 |
| AZI2       | -1.043951 | 4.9953626 | -4.312397 | 0.0007044 | 0.0097846 | -0.409162 |
| NUP43      | -1.048142 | 5.2677249 | -4.306503 | 0.0007125 | 0.0098438 | -0.420394 |
| CCNT2-AS1  | -1.22849  | 4.2188415 | -4.305284 | 0.0007142 | 0.0098538 | -0.422717 |
| LINC00957  | -1.149028 | 6.0215182 | -4.303747 | 0.0007164 | 0.0098766 | -0.425647 |
| RNF165     | -1.100681 | 5.6610767 | -4.297592 | 0.000725  | 0.0099552 | -0.437381 |
| LINC00710  | -1.179971 | 3.0193292 | -4.296757 | 0.0007262 | 0.0099622 | -0.438973 |
| FLG2       | -1.806368 | 4.7042202 | -4.296007 | 0.0007272 | 0.0099659 | -0.440403 |
| LOC1001349 | -1.196296 | 5.8112681 | -4.294787 | 0.000729  | 0.0099776 | -0.44273  |
| CYP1A1     | -1.089922 | 4.2368425 | -4.284594 | 0.0007435 | 0.0101419 | -0.46217  |
| PNMA2      | -1.025522 | 8.5720586 | -4.283348 | 0.0007453 | 0.0101462 | -0.464547 |
| PRO0471    | -1.128196 | 2.8214222 | -4.281876 | 0.0007475 | 0.0101685 | -0.467357 |
| COL22A1    | -1.591643 | 3.6092458 | -4.278214 | 0.0007528 | 0.010214  | -0.474344 |
| CRISPLD1   | 1.2032614 | 3.8282141 | 4.276999  | 0.0007546 | 0.0102227 | -0.476662 |
| LOC1005065 | -1.070954 | 4.8919004 | -4.276733 | 0.000755  | 0.0102227 | -0.477169 |
| CHMP2B     | -1.186158 | 5.417817  | -4.273994 | 0.000759  | 0.0102439 | -0.482397 |
| MRPL34     | -1.108461 | 6.1834465 | -4.271485 | 0.0007627 | 0.0102601 | -0.487184 |
| OBP2B      | -1.305567 | 3.9557502 | -4.268197 | 0.0007676 | 0.0103057 | -0.493462 |
| ERVK13-1   | -1.064751 | 4.8963941 | -4.2671   | 0.0007693 | 0.010321  | -0.495556 |
| DPH6-AS1   | -1.231576 | 2.7224832 | -4.265506 | 0.0007717 | 0.0103225 | -0.498599 |
| BBS5       | -1.173322 | 3.7628063 | -4.264929 | 0.0007725 | 0.0103225 | -0.4997   |
| NDUFA5     | -1.099705 | 4.6694233 | -4.264851 | 0.0007727 | 0.0103225 | -0.49985  |
| TMPRSS4    | -1.077281 | 4.4276899 | -4.26431  | 0.0007735 | 0.0103225 | -0.500882 |
| ZNF542P    | -1.200621 | 4.1146861 | -4.263436 | 0.0007748 | 0.0103225 | -0.50255  |
| PDLIM2     | -1.014333 | 5.4404853 | -4.263332 | 0.0007749 | 0.0103225 | -0.50275  |
| LOC283454  | -2.309111 | 6.1249125 | -4.261826 | 0.0007772 | 0.0103314 | -0.505626 |
| CPNE1      | -1.465138 | 7.9523217 | -4.256891 | 0.0007847 | 0.010403  | -0.515051 |
| GTF2IRD2B  | -1.135526 | 4.6475602 | -4.256672 | 0.0007851 | 0.010403  | -0.515469 |
| NOM1       | -1.074514 | 4.2625668 | -4.256322 | 0.0007856 | 0.0104033 | -0.516136 |
| TAS2R38    | -1.185833 | 3.7067023 | -4.254115 | 0.000789  | 0.0104346 | -0.520351 |
| VAR5       | -1.006122 | 6.9873821 | -4.252793 | 0.000791  | 0.010448  | -0.522877 |
| PRPS2      | -1.745984 | 6.154411  | -4.252126 | 0.000792  | 0.0104481 | -0.524152 |
| MRPL2      | -1.204983 | 5.3133384 | -4.246196 | 0.0008012 | 0.0105491 | -0.53548  |
| TRPA1      | -1.017611 | 4.5809309 | -4.244118 | 0.0008045 | 0.0105688 | -0.539451 |
| CRBN       | -1.037164 | 7.7805934 | -4.243541 | 0.0008054 | 0.0105688 | -0.540554 |
| SRSF11     | -1.679252 | 5.3905239 | -4.243405 | 0.0008056 | 0.0105688 | -0.540813 |
| ZNF701     | -1.069527 | 4.339838  | -4.241753 | 0.0008082 | 0.0105688 | -0.54397  |
| SLC5A4     | -1.242371 | 4.241875  | -4.239617 | 0.0008116 | 0.0105788 | -0.548053 |
| DOC2A      | -1.638745 | 8.8254818 | -4.239497 | 0.0008118 | 0.0105788 | -0.548282 |
| SORCS3-AS1 | -1.414497 | 5.2844434 | -4.239496 | 0.0008118 | 0.0105788 | -0.548283 |
| CCM2L      | -1.001703 | 3.550818  | -4.236646 | 0.0008163 | 0.0106107 | -0.55373  |
| GABRA5     | -1.668528 | 6.8459654 | -4.235678 | 0.0008178 | 0.0106164 | -0.555582 |
| PRKCI      | -1.162462 | 7.7829561 | -4.235615 | 0.0008179 | 0.0106164 | -0.555701 |

|            |           |           |           |           |           |           |
|------------|-----------|-----------|-----------|-----------|-----------|-----------|
| BTNL9      | -1.079211 | 4.7716124 | -4.235395 | 0.0008183 | 0.0106164 | -0.556122 |
| LOC1009964 | -1.148112 | 5.5567701 | -4.235057 | 0.0008188 | 0.0106166 | -0.556768 |
| ART3       | -1.437293 | 5.05266   | -4.234282 | 0.0008201 | 0.0106259 | -0.558249 |
| GRM4       | -1.004238 | 5.696563  | -4.232967 | 0.0008222 | 0.01063   | -0.560763 |
| KLHDC3     | -1.109142 | 8.8121576 | -4.231649 | 0.0008243 | 0.01063   | -0.563283 |
| DISP2      | -1.221657 | 6.4566787 | -4.229641 | 0.0008275 | 0.0106416 | -0.567122 |
| KIR2DS1    | -1.016879 | 4.3069158 | -4.223479 | 0.0008375 | 0.0107097 | -0.578904 |
| ZNF284     | -1.480132 | 4.6068887 | -4.218976 | 0.0008449 | 0.0107571 | -0.587518 |
| YPEL2      | -1.168428 | 6.8508288 | -4.216138 | 0.0008496 | 0.0107766 | -0.592945 |
| GRM2       | -1.211015 | 6.5244168 | -4.21224  | 0.0008561 | 0.0108253 | -0.600404 |
| KCNK1      | -1.052786 | 6.3443378 | -4.209491 | 0.0008607 | 0.0108679 | -0.605663 |
| CFD        | -1.10211  | 4.2042113 | -4.209278 | 0.000861  | 0.0108679 | -0.60607  |
| LINC01339  | -1.024374 | 4.5448617 | -4.208513 | 0.0008623 | 0.010876  | -0.607534 |
| ZNF541     | -1.230308 | 3.9408937 | -4.206118 | 0.0008664 | 0.0108917 | -0.612118 |
| NDUFS3     | -1.029899 | 8.2827447 | -4.20518  | 0.000868  | 0.0108917 | -0.613912 |
| CDC7       | -1.479632 | 5.0107673 | -4.204042 | 0.0008699 | 0.0108917 | -0.61609  |
| ALMS1P     | -1.039784 | 5.7590129 | -4.202263 | 0.0008729 | 0.0108939 | -0.619496 |
| OSGEP      | -1.125495 | 6.1331102 | -4.201081 | 0.0008749 | 0.0109086 | -0.621758 |
| BVES-AS1   | -1.132461 | 3.815268  | -4.197583 | 0.0008809 | 0.0109591 | -0.628453 |
| BC048103 / | -1.012231 | 5.4737097 | -4.197466 | 0.0008811 | 0.0109591 | -0.628677 |
| H2BFM      | -1.036634 | 3.3978552 | -4.196901 | 0.0008821 | 0.0109646 | -0.629759 |
| FAM86C1    | -1.135172 | 5.8244133 | -4.193928 | 0.0008872 | 0.0110017 | -0.635451 |
| ASPRV1     | -1.149433 | 5.3377411 | -4.1926   | 0.0008895 | 0.0110121 | -0.637994 |
| USP30      | -1.021944 | 5.6708689 | -4.192514 | 0.0008897 | 0.0110121 | -0.638157 |
| MAGI2-AS2  | 1.1423964 | 3.4765293 | 4.1869169 | 0.0008995 | 0.0110795 | -0.648876 |
| SH2D5      | -1.131236 | 6.9815086 | -4.185659 | 0.0009017 | 0.011087  | -0.651285 |
| PRKXP1     | -1.081474 | 4.9082026 | -4.183704 | 0.0009051 | 0.0111143 | -0.65503  |
| KCNE1      | -1.110702 | 2.9769158 | -4.183386 | 0.0009057 | 0.0111143 | -0.655638 |
| CAPNS1     | -1.196642 | 8.7045717 | -4.181816 | 0.0009085 | 0.0111189 | -0.658645 |
| LINC00845  | -1.048956 | 5.4512283 | -4.178651 | 0.0009141 | 0.0111458 | -0.664708 |
| CH25H      | -1.50909  | 4.0476208 | -4.174737 | 0.0009211 | 0.0112047 | -0.672205 |
| HIP1       | -1.032531 | 4.0087394 | -4.173295 | 0.0009237 | 0.0112297 | -0.674969 |
| ETV3       | -1.108742 | 6.267431  | -4.172445 | 0.0009253 | 0.011235  | -0.676597 |
| LYRM9      | -1.221289 | 5.3313388 | -4.17205  | 0.000926  | 0.0112367 | -0.677356 |
| PPEF1      | -2.215378 | 5.1373206 | -4.17176  | 0.0009265 | 0.0112367 | -0.67791  |
| RFPL1      | -1.051246 | 2.3971375 | -4.164728 | 0.0009393 | 0.0113089 | -0.691387 |
| SLC38A9    | -1.17502  | 4.8918705 | -4.164724 | 0.0009393 | 0.0113089 | -0.691393 |
| FCHSD2     | -1.273026 | 5.4036662 | -4.16259  | 0.0009433 | 0.0113295 | -0.695485 |
| C1orf226   | -1.046936 | 5.4062652 | -4.159729 | 0.0009486 | 0.0113418 | -0.700968 |
| LOC1019281 | -1.213777 | 3.5243864 | -4.15798  | 0.0009518 | 0.011366  | -0.704321 |
| FAM103A1   | -1.272631 | 6.7171801 | -4.157493 | 0.0009527 | 0.011366  | -0.705255 |
| TRIM78P    | -1.034533 | 3.143512  | -4.156508 | 0.0009546 | 0.0113746 | -0.707143 |
| RRH        | -1.021486 | 3.6732467 | -4.155847 | 0.0009558 | 0.0113761 | -0.70841  |
| SLC25A26   | -1.076597 | 7.1832709 | -4.15538  | 0.0009567 | 0.0113799 | -0.709306 |
| LY86-AS1   | -1.481141 | 4.5751345 | -4.154767 | 0.0009578 | 0.0113803 | -0.71048  |
| C3orf36    | -1.032775 | 3.733268  | -4.153602 | 0.00096   | 0.0113996 | -0.712715 |
| ZNF468     | -1.061692 | 3.4562933 | -4.149137 | 0.0009684 | 0.0114797 | -0.721276 |
| MACROD2-AS | -1.145728 | 2.7951233 | -4.143115 | 0.0009799 | 0.011528  | -0.732827 |
| INTS4L1    | -1.126492 | 4.5078072 | -4.143061 | 0.00098   | 0.011528  | -0.73293  |
| EGF        | -1.139056 | 3.3602323 | -4.142707 | 0.0009807 | 0.011528  | -0.733609 |
| PSMD7      | -1.402743 | 6.7208046 | -4.135666 | 0.0009943 | 0.0116177 | -0.747116 |

|            |           |           |           |           |           |           |
|------------|-----------|-----------|-----------|-----------|-----------|-----------|
| KIF13B     | -1.03516  | 7.4692638 | -4.130369 | 0.0010047 | 0.0116859 | -0.757279 |
| LPPR2      | -1.054409 | 7.6271901 | -4.129718 | 0.0010059 | 0.0116865 | -0.758528 |
| FUT11      | -1.173033 | 4.439625  | -4.128891 | 0.0010076 | 0.0116865 | -0.760116 |
| HAR1A      | -1.140543 | 6.6449387 | -4.126981 | 0.0010114 | 0.0117058 | -0.763782 |
| SLC01A2    | -1.500743 | 3.7401347 | -4.126606 | 0.0010121 | 0.0117058 | -0.7645   |
| LHPP       | -1.010335 | 4.6407242 | -4.125608 | 0.0010141 | 0.0117135 | -0.766416 |
| LOC1005057 | -1.950972 | 5.4592326 | -4.123464 | 0.0010183 | 0.011721  | -0.770531 |
| IGSF9      | -1.097104 | 5.3491035 | -4.123136 | 0.001019  | 0.011721  | -0.771161 |
| WFIKKN1    | -1.026184 | 5.1359364 | -4.12027  | 0.0010247 | 0.0117392 | -0.776661 |
| PKNOX1     | -1.016846 | 6.2318795 | -4.118625 | 0.001028  | 0.01175   | -0.779819 |
| APCDD1L    | -1.028535 | 4.5205193 | -4.118092 | 0.0010291 | 0.01175   | -0.780842 |
| SETBP1     | -1.299709 | 6.3048577 | -4.117052 | 0.0010312 | 0.01175   | -0.782838 |
| CYP26A1    | -1.090108 | 3.8272645 | -4.116783 | 0.0010318 | 0.01175   | -0.783355 |
| SCP2D1     | -1.062037 | 3.4918935 | -4.115326 | 0.0010347 | 0.01175   | -0.786152 |
| MED11      | -1.113238 | 5.9201955 | -4.114246 | 0.0010369 | 0.01175   | -0.788225 |
| XPA        | -1.067268 | 6.6934712 | -4.110426 | 0.0010447 | 0.0118045 | -0.79556  |
| RASD2      | -1.682415 | 6.9641379 | -4.108189 | 0.0010493 | 0.011848  | -0.799857 |
| LOC1019283 | -1.213167 | 3.9123839 | -4.106087 | 0.0010536 | 0.0118831 | -0.803894 |
| TMEM56     | -1.50088  | 5.8435426 | -4.105664 | 0.0010545 | 0.0118831 | -0.804705 |
| NXPH4      | -1.235883 | 3.8237345 | -4.101152 | 0.0010639 | 0.0119598 | -0.813372 |
| B3GALNT1   | -1.237101 | 4.7293277 | -4.098011 | 0.0010704 | 0.0120073 | -0.819406 |
| PRR26      | 1.0231946 | 4.5012882 | 4.0930956 | 0.0010808 | 0.0120886 | -0.828848 |
| LOC1027237 | -1.060885 | 3.2472711 | -4.092624 | 0.0010818 | 0.0120886 | -0.829755 |
| LOC101928C | -1.055716 | 3.4362108 | -4.09059  | 0.0010861 | 0.0121235 | -0.833662 |
| ITPR1-AS1  | -1.475388 | 4.5767201 | -4.08908  | 0.0010894 | 0.0121452 | -0.836563 |
| TUBB4B     | -1.264385 | 9.6442807 | -4.08621  | 0.0010955 | 0.0121684 | -0.842079 |
| FAM221B    | -1.223561 | 3.7881017 | -4.083657 | 0.001101  | 0.0122091 | -0.846984 |
| BC069782 / | -1.163618 | 5.2192105 | -4.082997 | 0.0011024 | 0.0122122 | -0.848252 |
| AKT1S1     | -1.114222 | 3.4653779 | -4.079578 | 0.0011099 | 0.0122402 | -0.854825 |
| GPC4       | -1.029441 | 4.8691456 | -4.077504 | 0.0011144 | 0.0122618 | -0.85881  |
| USP46      | -1.121696 | 5.3908408 | -4.077359 | 0.0011147 | 0.0122618 | -0.859089 |
| NDUFAB1    | -1.365049 | 6.704615  | -4.07506  | 0.0011197 | 0.0122804 | -0.863509 |
| CHIAP2     | -1.128409 | 3.3050372 | -4.074836 | 0.0011202 | 0.0122804 | -0.863939 |
| MOCS2      | -1.187896 | 6.1225093 | -4.073152 | 0.001124  | 0.0122908 | -0.867178 |
| LRR4C      | -1.010297 | 8.2842622 | -4.072808 | 0.0011247 | 0.0122925 | -0.867838 |
| R3HCC1L    | -1.039195 | 4.5848232 | -4.07161  | 0.0011274 | 0.0123017 | -0.870141 |
| LYSMD3     | -1.554933 | 4.7523178 | -4.069103 | 0.0011329 | 0.0123427 | -0.874962 |
| OTUD6B-AS1 | -1.132869 | 4.3311208 | -4.066435 | 0.0011389 | 0.0123877 | -0.880091 |
| SNCG       | -1.109377 | 6.8048832 | -4.065908 | 0.0011401 | 0.012394  | -0.881105 |
| STK32C     | -1.172235 | 6.4862773 | -4.065431 | 0.0011411 | 0.012399  | -0.882022 |
| ZNF613     | -1.04911  | 3.0493387 | -4.063971 | 0.0011444 | 0.0124253 | -0.88483  |
| KCNJ14     | -1.111036 | 4.3329545 | -4.063483 | 0.0011455 | 0.0124267 | -0.885769 |
| ZC3H13     | -1.268449 | 5.873797  | -4.056891 | 0.0011604 | 0.0125289 | -0.898445 |
| PPM1B      | -1.562771 | 6.5924747 | -4.05435  | 0.0011662 | 0.0125651 | -0.903334 |
| OVGP1      | -1.12386  | 5.1227785 | -4.052159 | 0.0011713 | 0.0125994 | -0.907548 |
| PLAA       | -1.268391 | 4.4020287 | -4.049422 | 0.0011776 | 0.0126474 | -0.912813 |
| ZCCHC12    | -1.01927  | 5.7579132 | -4.045931 | 0.0011857 | 0.0127011 | -0.91953  |
| AFAP1L2    | -1.298142 | 6.2702599 | -4.042871 | 0.0011928 | 0.0127292 | -0.925418 |
| SPATA1     | -1.22082  | 4.513798  | -4.042552 | 0.0011936 | 0.0127292 | -0.926031 |
| POLR1D     | -1.158151 | 5.538581  | -4.042439 | 0.0011938 | 0.0127292 | -0.926249 |
| EPM2A      | -1.08064  | 6.4770952 | -4.042361 | 0.001194  | 0.0127292 | -0.926399 |

|            |           |           |           |           |           |           |
|------------|-----------|-----------|-----------|-----------|-----------|-----------|
| LIN28A     | -1.175867 | 4.621688  | -4.040853 | 0.0011976 | 0.012747  | -0.929302 |
| PCDH19     | -1.096859 | 5.6126851 | -4.04021  | 0.0011991 | 0.012747  | -0.930539 |
| OR7E104P   | -1.022992 | 5.8947255 | -4.039922 | 0.0011998 | 0.012747  | -0.931092 |
| TOP1       | -1.157434 | 6.8786748 | -4.035739 | 0.0012097 | 0.0128106 | -0.939142 |
| PARK7      | -1.133745 | 9.2476487 | -4.030522 | 0.0012222 | 0.0129092 | -0.949183 |
| LOC729680  | -1.227401 | 6.9153441 | -4.026595 | 0.0012316 | 0.0129493 | -0.956743 |
| MYL6B      | -1.14664  | 7.7344399 | -4.02624  | 0.0012325 | 0.0129493 | -0.957427 |
| FASTKD5    | -1.192141 | 5.6430902 | -4.026015 | 0.001233  | 0.0129493 | -0.957859 |
| TRIP4      | -1.200315 | 6.081423  | -4.023894 | 0.0012382 | 0.0129781 | -0.961943 |
| PKIA       | -1.450476 | 7.2443341 | -4.023226 | 0.0012398 | 0.0129819 | -0.963228 |
| MAGEE1     | -1.371505 | 8.1816973 | -4.021214 | 0.0012447 | 0.0129992 | -0.967104 |
| OSR1       | -1.320433 | 3.4911107 | -4.020828 | 0.0012457 | 0.0129992 | -0.967847 |
| ADPRHL2    | -1.129427 | 7.3489332 | -4.020317 | 0.0012469 | 0.0129992 | -0.96883  |
| SORCS1     | -1.147285 | 8.2236746 | -4.01985  | 0.0012481 | 0.0130019 | -0.96973  |
| MIR4313    | -1.246755 | 5.2274131 | -4.018398 | 0.0012516 | 0.0130258 | -0.972525 |
| LOC1001294 | -1.062715 | 3.4869717 | -4.010059 | 0.0012724 | 0.0131411 | -0.988583 |
| C5orf34    | -1.620967 | 3.1611761 | -4.008377 | 0.0012766 | 0.0131647 | -0.991823 |
| TAX1BP1    | -1.21035  | 7.2143313 | -4.004849 | 0.0012855 | 0.0132165 | -0.99862  |
| CXorf23    | -1.090694 | 3.404681  | -4.00311  | 0.0012899 | 0.0132418 | -1.001968 |
| COPRS      | -1.014874 | 7.5521081 | -3.996201 | 0.0013075 | 0.0133296 | -1.01528  |
| NR2F1      | -1.467189 | 7.6444146 | -3.992643 | 0.0013167 | 0.0134001 | -1.022134 |
| SOCS5      | -1.211841 | 4.5996616 | -3.99251  | 0.0013171 | 0.0134001 | -1.02239  |
| LRIF1      | -1.096518 | 2.7569379 | -3.991045 | 0.0013209 | 0.0134122 | -1.025214 |
| CYB5R4     | -1.020507 | 4.8245306 | -3.9907   | 0.0013218 | 0.0134122 | -1.025878 |
| NTSR1      | -1.180464 | 5.0870319 | -3.989533 | 0.0013248 | 0.0134255 | -1.028128 |
| ELTD1      | 1.429073  | 4.4064941 | 3.9890246 | 0.0013262 | 0.0134323 | -1.029107 |
| CMTM8      | -1.431259 | 4.0567604 | -3.985038 | 0.0013366 | 0.0134915 | -1.03679  |
| LOC1005065 | -1.441878 | 6.3609389 | -3.983683 | 0.0013402 | 0.0135142 | -1.0394   |
| IGK        | -1.022099 | 5.4922528 | -3.981445 | 0.0013461 | 0.0135283 | -1.043715 |
| COMMD9     | -1.00273  | 7.4026073 | -3.980663 | 0.0013482 | 0.0135414 | -1.045221 |
| IMMP1L     | -1.439373 | 5.051809  | -3.975476 | 0.001362  | 0.0136471 | -1.055221 |
| PMEL       | -1.012685 | 5.1106545 | -3.975117 | 0.001363  | 0.01365   | -1.055912 |
| LGMN       | -1.171206 | 5.3538511 | -3.970456 | 0.0013756 | 0.0137171 | -1.064898 |
| ARMC8      | -1.030666 | 5.5930473 | -3.967349 | 0.001384  | 0.01375   | -1.070888 |
| AK5        | -1.019287 | 10.401096 | -3.96505  | 0.0013903 | 0.01375   | -1.075321 |
| FGF19      | -1.023539 | 3.4216155 | -3.964998 | 0.0013905 | 0.01375   | -1.075422 |
| IARS2      | -1.108161 | 5.3680098 | -3.959016 | 0.001407  | 0.0138658 | -1.086956 |
| ADAMTSL4   | -1.009339 | 5.1095711 | -3.958118 | 0.0014095 | 0.0138658 | -1.088689 |
| NICN1      | -1.082129 | 7.8560324 | -3.957443 | 0.0014113 | 0.0138658 | -1.089991 |
| MRPS23     | -1.158984 | 6.2958943 | -3.957372 | 0.0014115 | 0.0138658 | -1.090127 |
| DPM2       | -1.07911  | 6.6509892 | -3.956934 | 0.0014127 | 0.0138658 | -1.090971 |
| LOC1027239 | -1.131839 | 7.803197  | -3.956102 | 0.0014151 | 0.0138727 | -1.092576 |
| FYTTD1     | -1.008896 | 4.0756175 | -3.953854 | 0.0014214 | 0.0139082 | -1.096912 |
| DYX1C1     | -1.048167 | 3.2672955 | -3.951596 | 0.0014277 | 0.0139564 | -1.101267 |
| WSCD2      | -1.017632 | 5.6892299 | -3.949967 | 0.0014323 | 0.0139946 | -1.104409 |
| C20orf85   | -1.174009 | 3.1582164 | -3.949062 | 0.0014349 | 0.0140052 | -1.106155 |
| GAL3ST4    | -1.026336 | 4.0774232 | -3.948454 | 0.0014366 | 0.0140052 | -1.107328 |
| FXVD6      | -1.29068  | 10.13713  | -3.948357 | 0.0014368 | 0.0140052 | -1.107514 |
| PHOX2B     | -1.072403 | 3.3441888 | -3.945391 | 0.0014453 | 0.0140611 | -1.113237 |
| DEPDC5     | -1.084627 | 6.000556  | -3.944805 | 0.001447  | 0.0140706 | -1.114366 |
| CHRD2      | -1.186549 | 4.7276758 | -3.943874 | 0.0014496 | 0.0140787 | -1.116164 |

|            |           |           |           |           |           |           |
|------------|-----------|-----------|-----------|-----------|-----------|-----------|
| IFT80      | -1.029757 | 4.6166201 | -3.93667  | 0.0014704 | 0.0142375 | -1.130062 |
| LOC1019276 | -1.096482 | 4.5436743 | -3.93489  | 0.0014755 | 0.0142605 | -1.133496 |
| IFIT5      | -1.17298  | 5.8603829 | -3.934572 | 0.0014765 | 0.0142628 | -1.13411  |
| TEX29      | -1.042734 | 5.6522824 | -3.927863 | 0.0014962 | 0.0143985 | -1.147057 |
| HAGH       | -1.069283 | 7.7981102 | -3.927862 | 0.0014962 | 0.0143985 | -1.147058 |
| LINC01049  | -1.105389 | 3.6439444 | -3.925315 | 0.0015037 | 0.0144507 | -1.151974 |
| GNL2       | -1.065935 | 6.4108396 | -3.923663 | 0.0015086 | 0.0144831 | -1.155162 |
| DMXL1      | -1.241312 | 6.061409  | -3.919988 | 0.0015196 | 0.0145217 | -1.162256 |
| USMG5      | -1.024641 | 10.497621 | -3.915798 | 0.0015322 | 0.014615  | -1.170344 |
| FLJ30403   | -1.080241 | 4.8614134 | -3.914492 | 0.0015362 | 0.0146247 | -1.172864 |
| GORAB      | -1.776565 | 4.4720232 | -3.913607 | 0.0015389 | 0.0146247 | -1.174572 |
| SLC12A7    | -1.064914 | 6.2876727 | -3.912412 | 0.0015425 | 0.014637  | -1.17688  |
| RPRM       | -1.122336 | 6.5357083 | -3.905919 | 0.0015624 | 0.0147491 | -1.189415 |
| ZNF571     | 1.0985379 | 4.3011225 | 3.9054693 | 0.0015638 | 0.0147491 | -1.190283 |
| UQCRFS1    | -1.028441 | 8.4769938 | -3.903106 | 0.0015711 | 0.0147794 | -1.194847 |
| RFWD3      | -1.193692 | 4.8322021 | -3.902268 | 0.0015737 | 0.0147903 | -1.196465 |
| LOC1027235 | -1.094435 | 3.6578771 | -3.9013   | 0.0015767 | 0.0147982 | -1.198333 |
| Clorf109   | -1.166705 | 4.1893911 | -3.897703 | 0.001588  | 0.0148628 | -1.205278 |
| LOC1009963 | -1.148351 | 4.8571626 | -3.893343 | 0.0016017 | 0.0149639 | -1.2137   |
| UNC50      | -1.324454 | 6.55684   | -3.887954 | 0.0016189 | 0.0150761 | -1.224108 |
| CGREF1     | -1.187819 | 5.675792  | -3.885335 | 0.0016273 | 0.0151337 | -1.229166 |
| INHBE      | -1.006048 | 2.8814485 | -3.882973 | 0.0016349 | 0.0151908 | -1.233728 |
| STARD3NL   | -1.684884 | 5.645459  | -3.882336 | 0.001637  | 0.015203  | -1.234958 |
| YPEL4      | -1.137259 | 7.0529839 | -3.878496 | 0.0016494 | 0.015267  | -1.242375 |
| GLIS2      | -1.041366 | 6.019933  | -3.868114 | 0.0016837 | 0.0154251 | -1.262435 |
| ID2        | -1.477047 | 5.9902513 | -3.864797 | 0.0016947 | 0.0154658 | -1.268843 |
| OR2B6      | -1.173332 | 3.2021005 | -3.862583 | 0.0017022 | 0.0154833 | -1.273122 |
| EYA1       | -1.00033  | 4.5148172 | -3.862346 | 0.001703  | 0.0154833 | -1.273579 |
| ZNF331     | -1.070446 | 8.0872151 | -3.8621   | 0.0017038 | 0.0154833 | -1.274054 |
| RAPGEF4-AS | -1.36735  | 4.9162219 | -3.861976 | 0.0017042 | 0.0154833 | -1.274294 |
| IPPK       | -1.04211  | 6.279517  | -3.848718 | 0.0017495 | 0.0156954 | -1.299916 |
| OR5P3      | -1.203027 | 3.1638546 | -3.846342 | 0.0017578 | 0.0157461 | -1.304509 |
| PCDH17     | -1.201901 | 7.1695586 | -3.84588  | 0.0017594 | 0.0157536 | -1.305401 |
| ACOT13     | -1.304203 | 7.964814  | -3.843775 | 0.0017667 | 0.0157932 | -1.309471 |
| TIPRL      | -1.222667 | 6.8976225 | -3.837045 | 0.0017904 | 0.0159201 | -1.322481 |
| TBL1XR1    | -1.165932 | 6.2942005 | -3.835905 | 0.0017945 | 0.0159349 | -1.324683 |
| MB21D2     | -1.127756 | 6.6679807 | -3.830297 | 0.0018145 | 0.0160159 | -1.335525 |
| ZBED5-AS1  | -1.000161 | 5.1595924 | -3.829144 | 0.0018187 | 0.0160318 | -1.337754 |
| CPOX       | -1.336551 | 3.4537742 | -3.825842 | 0.0018306 | 0.0161024 | -1.344138 |
| MRPS36     | -1.254311 | 5.536473  | -3.819423 | 0.001854  | 0.0162038 | -1.356551 |
| NRSN1      | -1.498322 | 9.4869398 | -3.81419  | 0.0018733 | 0.0162754 | -1.366669 |
| LSM1       | -1.263608 | 7.1039235 | -3.812174 | 0.0018808 | 0.0163235 | -1.370569 |
| PAK7       | -1.209339 | 6.462916  | -3.808733 | 0.0018937 | 0.0163908 | -1.377224 |
| GALNT7     | -1.187642 | 4.8610304 | -3.808697 | 0.0018938 | 0.0163908 | -1.377293 |
| SDF2       | -1.02593  | 6.7045676 | -3.807335 | 0.001899  | 0.0164074 | -1.379927 |
| DRD1       | -1.203778 | 5.5793999 | -3.806541 | 0.0019019 | 0.0164172 | -1.381463 |
| ENPP7      | -1.030896 | 4.6106243 | -3.805172 | 0.0019071 | 0.0164431 | -1.38411  |
| OCIAD2     | -1.165681 | 7.749418  | -3.803776 | 0.0019124 | 0.016464  | -1.38681  |
| GPR31      | -1.031892 | 4.3929639 | -3.80293  | 0.0019156 | 0.0164689 | -1.388447 |
| LOC338963  | -1.048355 | 3.9230733 | -3.802261 | 0.0019181 | 0.0164689 | -1.38974  |
| PGRMC2     | -1.116333 | 6.2561721 | -3.799901 | 0.0019271 | 0.0164907 | -1.394306 |

|            |           |           |           |           |           |           |
|------------|-----------|-----------|-----------|-----------|-----------|-----------|
| ZFP14      | -1.190533 | 6.7238711 | -3.797445 | 0.0019365 | 0.0165366 | -1.399055 |
| ERMP1      | -1.321753 | 5.6386241 | -3.793356 | 0.0019523 | 0.0166157 | -1.406964 |
| VAT1L      | -1.664372 | 7.829945  | -3.7924   | 0.001956  | 0.0166333 | -1.408815 |
| USP28      | -1.154932 | 6.1734515 | -3.790756 | 0.0019624 | 0.016667  | -1.411996 |
| LOC1019283 | -1.125422 | 4.9193    | -3.78948  | 0.0019674 | 0.0166899 | -1.414463 |
| LY96       | -1.23808  | 3.1602029 | -3.789127 | 0.0019687 | 0.0166932 | -1.415146 |
| EFNA3      | -1.057914 | 6.3143498 | -3.788793 | 0.0019701 | 0.0166973 | -1.415791 |
| ELOVL2     | 1.1592819 | 4.7536382 | 3.7884983 | 0.0019712 | 0.0167001 | -1.416362 |
| MYADM      | -1.001265 | 7.4883858 | -3.785786 | 0.0019818 | 0.0167455 | -1.42161  |
| ACKR1      | -1.233285 | 6.4602311 | -3.78563  | 0.0019824 | 0.0167455 | -1.421911 |
| CLVS2      | -1.416404 | 4.7498594 | -3.785594 | 0.0019826 | 0.0167455 | -1.42198  |
| ADAMTS3    | -1.293144 | 4.0881607 | -3.779429 | 0.002007  | 0.0168635 | -1.433907 |
| ZNF442     | -1.274762 | 4.2542298 | -3.777235 | 0.0020157 | 0.0169054 | -1.438153 |
| HDGFL1     | -1.060664 | 5.2516639 | -3.774829 | 0.0020254 | 0.0169554 | -1.442807 |
| LINC01104  | -1.004384 | 2.9327442 | -3.773711 | 0.0020299 | 0.0169723 | -1.44497  |
| VDAC2      | -1.157514 | 10.026653 | -3.768278 | 0.0020519 | 0.0170846 | -1.455482 |
| MYOT       | -1.103829 | 3.366341  | -3.762415 | 0.0020759 | 0.017169  | -1.466827 |
| TMEM55A    | -1.561585 | 4.1273112 | -3.761652 | 0.002079  | 0.0171818 | -1.468305 |
| DHRS11     | -1.049955 | 5.7196587 | -3.756366 | 0.0021009 | 0.0172852 | -1.478534 |
| MOCS3      | -1.134292 | 3.8423688 | -3.750432 | 0.0021258 | 0.0174083 | -1.490016 |
| SMIM3      | -1.273103 | 5.1256756 | -3.750148 | 0.002127  | 0.0174083 | -1.490567 |
| ZWILCH     | -1.102585 | 5.5799373 | -3.750089 | 0.0021273 | 0.0174083 | -1.49068  |
| MRPL1      | -1.213531 | 6.8664483 | -3.748316 | 0.0021348 | 0.0174264 | -1.494112 |
| SH2D4A     | -1.035267 | 6.5580205 | -3.746821 | 0.0021411 | 0.0174264 | -1.497005 |
| UBE2T      | -1.232917 | 7.5052729 | -3.746817 | 0.0021411 | 0.0174264 | -1.497014 |
| GOLT1B     | -1.590911 | 5.8770719 | -3.746791 | 0.0021413 | 0.0174264 | -1.497063 |
| IBTK       | -1.05696  | 3.9674297 | -3.743914 | 0.0021535 | 0.0174845 | -1.502632 |
| STXBP5L    | -1.523631 | 7.1739763 | -3.737973 | 0.0021791 | 0.017603  | -1.514131 |
| CCK        | -1.285851 | 8.2329527 | -3.736965 | 0.0021834 | 0.0176086 | -1.516081 |
| MLLT4-AS1  | -1.010709 | 3.6797329 | -3.726608 | 0.0022288 | 0.0178269 | -1.536129 |
| SCYL3      | -1.326236 | 5.5213044 | -3.720322 | 0.0022568 | 0.017952  | -1.548298 |
| CYFIP2     | -1.010186 | 9.3148543 | -3.719737 | 0.0022594 | 0.017952  | -1.549429 |
| RAB2A      | -1.000026 | 7.3526926 | -3.719435 | 0.0022608 | 0.017952  | -1.550015 |
| DNAJB9     | -1.197313 | 4.9450305 | -3.716614 | 0.0022735 | 0.0179805 | -1.555475 |
| KIAA0087   | -1.41823  | 4.901172  | -3.713906 | 0.0022858 | 0.0180426 | -1.560718 |
| FAM102B    | -1.671293 | 6.8929823 | -3.71075  | 0.0023001 | 0.0180927 | -1.566828 |
| TMEM41B    | -1.055278 | 6.0466566 | -3.709369 | 0.0023065 | 0.0181082 | -1.569501 |
| DOC2B      | -1.068371 | 4.7100397 | -3.707424 | 0.0023154 | 0.0181435 | -1.573266 |
| LOC1019271 | -1.10057  | 5.0136054 | -3.706654 | 0.0023189 | 0.0181622 | -1.574756 |
| PSPH       | -1.058053 | 3.4727768 | -3.703649 | 0.0023328 | 0.0182104 | -1.580574 |
| NAPEPLD    | -1.085918 | 5.4826308 | -3.700806 | 0.002346  | 0.0182701 | -1.586079 |
| CMC1       | -1.07648  | 3.4979185 | -3.694075 | 0.0023776 | 0.0184325 | -1.59911  |
| HHIPL2     | -1.10374  | 4.0578706 | -3.693824 | 0.0023788 | 0.0184325 | -1.599597 |
| ZNF281     | -1.332043 | 6.0837418 | -3.691733 | 0.0023887 | 0.0184805 | -1.603644 |
| THEG5      | -1.213405 | 5.6013135 | -3.688902 | 0.0024022 | 0.0185403 | -1.609126 |
| OSTF1      | -1.287019 | 6.4679163 | -3.688182 | 0.0024056 | 0.0185454 | -1.61052  |
| PRPF39     | -1.776024 | 3.8441945 | -3.684069 | 0.0024254 | 0.0186275 | -1.618484 |
| MLYCD      | -1.001187 | 5.3843178 | -3.683328 | 0.002429  | 0.0186409 | -1.619919 |
| PCMT1      | -1.118159 | 9.2015397 | -3.68293  | 0.0024309 | 0.0186417 | -1.62069  |
| LINC01342  | -1.1275   | 4.8791576 | -3.679936 | 0.0024454 | 0.0186899 | -1.626486 |
| IGIP       | -1.100695 | 7.9932827 | -3.678162 | 0.002454  | 0.0187395 | -1.629921 |

|            |           |           |           |           |           |           |
|------------|-----------|-----------|-----------|-----------|-----------|-----------|
| PRO1596    | -1.49148  | 5.5908005 | -3.677965 | 0.002455  | 0.0187395 | -1.630303 |
| SRBD1      | -1.158246 | 4.8520912 | -3.670324 | 0.0024926 | 0.0189152 | -1.645097 |
| KLHL42     | -1.002142 | 7.0974157 | -3.670282 | 0.0024928 | 0.0189152 | -1.64518  |
| LOC1019285 | -1.038364 | 5.9907763 | -3.664335 | 0.0025225 | 0.019023  | -1.656694 |
| GLRX       | -1.228661 | 7.0154796 | -3.660858 | 0.00254   | 0.0191058 | -1.663428 |
| TNF        | -1.022926 | 3.2526761 | -3.660107 | 0.0025438 | 0.0191062 | -1.664881 |
| ARMCX2     | -1.291768 | 6.9036184 | -3.653365 | 0.0025781 | 0.019245  | -1.677938 |
| R3HDM1     | -1.076832 | 7.2752929 | -3.652882 | 0.0025806 | 0.019245  | -1.678872 |
| NDUFS2     | -1.101665 | 7.5172045 | -3.652837 | 0.0025808 | 0.019245  | -1.678959 |
| RALY       | -1.047085 | 8.1214541 | -3.652063 | 0.0025848 | 0.0192589 | -1.680457 |
| CACNG3     | -1.059447 | 6.9755197 | -3.648521 | 0.0026031 | 0.019344  | -1.687317 |
| TMEM17     | -1.238427 | 4.0431332 | -3.647917 | 0.0026062 | 0.019355  | -1.688487 |
| CMTM5      | -1.014379 | 5.7195042 | -3.64614  | 0.0026154 | 0.0194024 | -1.691928 |
| NCKAP1     | -1.177081 | 6.9255931 | -3.644467 | 0.0026242 | 0.0194319 | -1.695167 |
| EPHX4      | -1.390869 | 6.2366768 | -3.643659 | 0.0026284 | 0.0194319 | -1.696733 |
| LOC1027239 | 1.0275175 | 4.3727234 | 3.643377  | 0.0026299 | 0.0194319 | -1.697278 |
| LOC283357  | -1.308887 | 3.9730815 | -3.642201 | 0.002636  | 0.0194423 | -1.699555 |
| HIST1H4G   | -1.004246 | 3.1524884 | -3.641343 | 0.0026405 | 0.0194615 | -1.701216 |
| BAG5       | -1.086681 | 5.6870073 | -3.641021 | 0.0026422 | 0.0194635 | -1.70184  |
| ARF4       | -1.132854 | 7.3219595 | -3.640254 | 0.0026462 | 0.0194697 | -1.703325 |
| TTC13      | -1.05532  | 5.0543714 | -3.640092 | 0.0026471 | 0.0194697 | -1.703639 |
| MKNK1-AS1  | 1.1727349 | 4.3569125 | 3.6400457 | 0.0026473 | 0.0194697 | -1.703729 |
| ZNF436     | -1.11964  | 6.6178224 | -3.638958 | 0.0026531 | 0.0194769 | -1.705836 |
| RAB2B      | -1.064985 | 6.5295991 | -3.636226 | 0.0026675 | 0.0195495 | -1.711126 |
| EML1       | -1.129962 | 4.5923025 | -3.636052 | 0.0026685 | 0.0195495 | -1.711462 |
| NDUFB1     | -1.000953 | 6.2010991 | -3.635522 | 0.0026713 | 0.0195614 | -1.71249  |
| GPR144     | -1.059001 | 5.0393029 | -3.634543 | 0.0026765 | 0.0195772 | -1.714384 |
| SMAGP      | -1.039556 | 3.7344591 | -3.634397 | 0.0026773 | 0.0195772 | -1.714668 |
| OARD1      | -1.101423 | 6.1487981 | -3.633052 | 0.0026844 | 0.0196016 | -1.717271 |
| PEG10      | -1.434639 | 6.4305367 | -3.632524 | 0.0026873 | 0.0196152 | -1.718294 |
| ASUN       | -1.391251 | 4.9229206 | -3.63095  | 0.0026957 | 0.0196628 | -1.721342 |
| MAK16      | -1.192626 | 5.4533249 | -3.624671 | 0.0027296 | 0.0198177 | -1.733501 |
| GIMAP7     | -1.545279 | 3.7536499 | -3.619791 | 0.0027563 | 0.019948  | -1.742952 |
| MTMR4      | -1.032308 | 7.117267  | -3.613178 | 0.0027928 | 0.0201168 | -1.755757 |
| CYTIP      | -1.378502 | 3.6407714 | -3.612564 | 0.0027962 | 0.0201168 | -1.756946 |
| BDNF       | -1.222295 | 5.6080308 | -3.610503 | 0.0028077 | 0.0201846 | -1.760937 |
| CRIPT      | -1.195998 | 6.6565922 | -3.609553 | 0.002813  | 0.0201873 | -1.762777 |
| CDK5R2     | -1.031296 | 7.7339772 | -3.607589 | 0.002824  | 0.020238  | -1.76658  |
| CRHBP      | -1.150634 | 5.9093584 | -3.603134 | 0.0028492 | 0.0203531 | -1.775208 |
| MRPL46     | -1.191638 | 5.7453026 | -3.596063 | 0.0028896 | 0.0205595 | -1.788901 |
| RPL9       | -1.06632  | 10.250205 | -3.591433 | 0.0029164 | 0.0206538 | -1.797865 |
| SP3        | -1.016069 | 5.8626775 | -3.591072 | 0.0029185 | 0.0206603 | -1.798565 |
| GALNT15    | -1.113112 | 4.4303932 | -3.577737 | 0.002997  | 0.0209854 | -1.824386 |
| SOCS2-AS1  | -1.304008 | 3.7028488 | -3.576856 | 0.0030023 | 0.0209869 | -1.826091 |
| LOC1005071 | -1.311197 | 6.3576284 | -3.569872 | 0.0030444 | 0.0211262 | -1.839615 |
| FSTL5      | -1.703845 | 4.734518  | -3.569762 | 0.003045  | 0.0211262 | -1.839827 |
| GNG3       | -1.110069 | 9.079278  | -3.569353 | 0.0030475 | 0.0211291 | -1.840619 |
| LOC1025462 | -1.013177 | 6.3169463 | -3.565732 | 0.0030696 | 0.0211959 | -1.847631 |
| NAT14      | -1.097463 | 7.1609562 | -3.565346 | 0.0030719 | 0.0212051 | -1.848377 |
| OCA2       | -1.036262 | 8.4993907 | -3.558796 | 0.0031123 | 0.0213975 | -1.861059 |
| UGDH       | -1.35914  | 5.1361469 | -3.557557 | 0.00312   | 0.0214125 | -1.863459 |



|            |           |           |           |           |           |           |
|------------|-----------|-----------|-----------|-----------|-----------|-----------|
| SCGB3A1    | -1.076333 | 5.9041999 | -3.556709 | 0.0031253 | 0.0214143 | -1.865101 |
| WFDC1      | -1.165487 | 5.661843  | -3.552292 | 0.0031529 | 0.0215675 | -1.873653 |
| YWHAB      | -1.14554  | 10.788628 | -3.551792 | 0.003156  | 0.0215746 | -1.874619 |
| LOC1019287 | -1.00041  | 2.5905592 | -3.550226 | 0.0031659 | 0.0216006 | -1.877652 |
| PLEKHG1    | 1.0455525 | 3.9990882 | 3.5489973 | 0.0031737 | 0.0216006 | -1.880031 |
| NIPAI      | -1.111865 | 8.5957393 | -3.542375 | 0.0032158 | 0.0217724 | -1.892852 |
| LCN6       | -1.061485 | 4.1026748 | -3.536708 | 0.0032524 | 0.0219503 | -1.903821 |
| MKX        | -1.102429 | 4.4735235 | -3.521803 | 0.0033505 | 0.0223365 | -1.932674 |
| POC5       | -1.188301 | 6.3026999 | -3.51961  | 0.0033652 | 0.022383  | -1.936918 |
| COPG2IT1   | -1.055062 | 9.4695747 | -3.518737 | 0.003371  | 0.022383  | -1.938609 |
| LOC286382  | -1.000474 | 4.8345132 | -3.515572 | 0.0033924 | 0.0224698 | -1.944735 |
| LINC01010  | -1.239445 | 4.5764298 | -3.514894 | 0.0033969 | 0.0224706 | -1.946046 |
| C10orf35   | -1.113689 | 7.8895681 | -3.51357  | 0.0034059 | 0.0225082 | -1.948609 |
| YARS2      | -1.25685  | 5.4170619 | -3.511311 | 0.0034213 | 0.0225515 | -1.95298  |
| LOC1019278 | -1.020341 | 4.8080382 | -3.508172 | 0.0034428 | 0.0225965 | -1.959057 |
| LOC1009966 | -1.001704 | 3.8720875 | -3.505049 | 0.0034643 | 0.022696  | -1.9651   |
| CHGB       | -1.778131 | 7.8477489 | -3.503759 | 0.0034732 | 0.0227325 | -1.967598 |
| PRRT2      | -1.008248 | 7.3270078 | -3.501983 | 0.0034855 | 0.0227802 | -1.971033 |
| LOC101927C | -1.05657  | 4.5119548 | -3.501535 | 0.0034887 | 0.0227802 | -1.971901 |
| TSC1       | -1.158185 | 8.048881  | -3.501066 | 0.0034919 | 0.0227802 | -1.972809 |
| MRPL19     | -1.111566 | 5.2642667 | -3.500672 | 0.0034947 | 0.0227802 | -1.973571 |
| NAPA       | -1.018052 | 6.8462581 | -3.500501 | 0.0034959 | 0.0227802 | -1.973903 |
| SDHD       | -1.132205 | 4.1468866 | -3.500486 | 0.003496  | 0.0227802 | -1.973931 |
| HRASLS5    | -1.125399 | 5.4856168 | -3.50047  | 0.0034961 | 0.0227802 | -1.973962 |
| OR3A3      | -1.085746 | 4.4804496 | -3.499821 | 0.0035006 | 0.0227952 | -1.975218 |
| PIK3CB     | -1.048173 | 6.8115812 | -3.496542 | 0.0035236 | 0.0228937 | -1.981563 |
| LOC644656  | -1.144121 | 5.6550901 | -3.491192 | 0.0035614 | 0.0230209 | -1.991916 |
| NPTXR      | -1.087399 | 6.8731677 | -3.48787  | 0.0035851 | 0.0230733 | -1.998344 |
| TMEM155    | -1.42702  | 6.6178887 | -3.487027 | 0.0035911 | 0.0230771 | -1.999975 |
| LPPR5      | -1.220028 | 5.6189666 | -3.482595 | 0.003623  | 0.0231934 | -2.008551 |
| ST6GALNAC5 | -1.338941 | 4.9335981 | -3.482345 | 0.0036248 | 0.0231977 | -2.009033 |
| RPA3OS     | -1.406431 | 3.5838983 | -3.474904 | 0.003679  | 0.0234566 | -2.023431 |
| TUSC1      | -1.385306 | 6.845433  | -3.474527 | 0.0036818 | 0.0234596 | -2.02416  |
| CLK4       | -1.037429 | 6.5196645 | -3.47111  | 0.0037069 | 0.0235467 | -2.030771 |
| HMGCLL1    | -1.02952  | 4.5954922 | -3.468525 | 0.0037261 | 0.0236171 | -2.03577  |
| ZNF524     | -1.031167 | 5.5101787 | -3.46834  | 0.0037275 | 0.0236185 | -2.036129 |
| RNF181     | -1.067357 | 6.980257  | -3.46797  | 0.0037302 | 0.0236195 | -2.036845 |
| PAIP1      | -1.061266 | 6.5591206 | -3.467333 | 0.003735  | 0.0236367 | -2.038076 |
| GNAT2      | -1.017954 | 4.4682459 | -3.465499 | 0.0037487 | 0.0236989 | -2.041625 |
| P4HTM      | -1.024157 | 7.6839588 | -3.462901 | 0.0037681 | 0.0237636 | -2.046649 |
| DOK4       | -1.066645 | 6.3453081 | -3.460444 | 0.0037867 | 0.0238385 | -2.051402 |
| ANKRD12    | -1.154157 | 6.4454635 | -3.454605 | 0.003831  | 0.0239704 | -2.062696 |
| SLTM       | -1.44233  | 5.2635222 | -3.454391 | 0.0038327 | 0.0239733 | -2.06311  |
| LOC1019306 | -1.059184 | 4.3033668 | -3.454072 | 0.0038351 | 0.0239766 | -2.063727 |
| HDHD1      | -1.3008   | 6.7329079 | -3.454016 | 0.0038355 | 0.0239766 | -2.063835 |
| PAN3       | -1.61654  | 6.8585665 | -3.452067 | 0.0038505 | 0.0240186 | -2.067604 |
| TXN        | -1.058048 | 8.7754931 | -3.450025 | 0.0038662 | 0.0240688 | -2.071553 |
| MAP10      | -1.245026 | 2.7242243 | -3.448832 | 0.0038754 | 0.0241153 | -2.07386  |
| TIMM21     | -1.346557 | 6.2460164 | -3.442557 | 0.0039243 | 0.0242863 | -2.085996 |
| C12orf29   | -1.248985 | 6.7702325 | -3.441021 | 0.0039363 | 0.0243153 | -2.088965 |
| DEGS2      | -1.147814 | 5.2404118 | -3.439538 | 0.003948  | 0.0243462 | -2.091833 |

|            |           |           |           |           |           |           |
|------------|-----------|-----------|-----------|-----------|-----------|-----------|
| GPR34      | -1.463953 | 3.0449026 | -3.436141 | 0.0039748 | 0.024438  | -2.098401 |
| PNMA1      | -1.174337 | 8.1745331 | -3.435961 | 0.0039763 | 0.024438  | -2.098749 |
| EPHA5      | -1.018906 | 5.1411677 | -3.435666 | 0.0039786 | 0.0244451 | -2.099319 |
| TRIM32     | -1.172097 | 5.9457668 | -3.429127 | 0.0040309 | 0.0246551 | -2.111961 |
| KCNH8      | -1.491543 | 3.4972468 | -3.428322 | 0.0040373 | 0.0246768 | -2.113519 |
| LOC1019272 | -1.0243   | 4.9048813 | -3.428237 | 0.004038  | 0.0246768 | -2.113682 |
| ANKRD13C   | -1.05241  | 4.9504048 | -3.424085 | 0.0040716 | 0.0247873 | -2.121709 |
| TUSC7      | -1.191835 | 5.0639373 | -3.423124 | 0.0040794 | 0.0248113 | -2.123566 |
| NEFL       | -1.361891 | 9.5097004 | -3.422011 | 0.0040885 | 0.0248586 | -2.125719 |
| UBE2Q2     | -1.532314 | 5.8163157 | -3.416272 | 0.0041356 | 0.0250637 | -2.136812 |
| TDRD9      | -1.30259  | 4.1208796 | -3.415553 | 0.0041415 | 0.0250772 | -2.138201 |
| RASGEF1C   | -1.096616 | 5.0913516 | -3.413757 | 0.0041564 | 0.0251325 | -2.141672 |
| GALNTL5    | -1.104693 | 4.8928939 | -3.413711 | 0.0041568 | 0.0251325 | -2.141761 |
| CTTNBP2    | -1.633793 | 4.9154354 | -3.406218 | 0.0042194 | 0.0253331 | -2.156243 |
| SIMC1      | -1.2418   | 4.5955822 | -3.403189 | 0.004245  | 0.0254552 | -2.162097 |
| POLI       | -1.134668 | 5.1925564 | -3.400843 | 0.0042649 | 0.0255447 | -2.166628 |
| EIF3M      | -1.018105 | 4.8190271 | -3.397818 | 0.0042908 | 0.0256319 | -2.172474 |
| F11-AS1    | -1.064687 | 3.0591424 | -3.39714  | 0.0042966 | 0.0256487 | -2.173783 |
| LOC284513  | -1.393394 | 6.463922  | -3.390371 | 0.004355  | 0.0258508 | -2.186862 |
| YTHDF1     | -1.489387 | 8.5108192 | -3.39035  | 0.0043552 | 0.0258508 | -2.186902 |
| SLC1A1     | -1.698527 | 6.6017005 | -3.384549 | 0.0044059 | 0.0260594 | -2.198108 |
| PSMG3      | -1.127292 | 6.8665215 | -3.382921 | 0.0044203 | 0.0261004 | -2.201253 |
| TBCA       | -1.126592 | 8.5777666 | -3.382131 | 0.0044273 | 0.0261118 | -2.202779 |
| RIT2       | -1.670237 | 5.5744239 | -3.380083 | 0.0044454 | 0.0261509 | -2.206734 |
| KHDRBS1    | -1.077555 | 6.8178654 | -3.377026 | 0.0044726 | 0.0262506 | -2.212639 |
| TBR1       | -1.051162 | 6.9697551 | -3.373546 | 0.0045038 | 0.0263434 | -2.219359 |
| FAM122B    | -1.21886  | 5.1414008 | -3.372508 | 0.0045131 | 0.02639   | -2.221363 |
| LOC1001281 | -1.121964 | 3.4708335 | -3.371405 | 0.0045231 | 0.026418  | -2.223493 |
| NIPSNAP3A  | -1.502205 | 4.494984  | -3.368558 | 0.0045489 | 0.0264779 | -2.228991 |
| P2RY1      | 1.0646628 | 3.8396707 | 3.3666234 | 0.0045665 | 0.0265275 | -2.232727 |
| CARTPT     | -1.092237 | 6.1775949 | -3.364929 | 0.0045819 | 0.0265646 | -2.235997 |
| GALNT14    | -1.192979 | 5.0041279 | -3.364694 | 0.0045841 | 0.0265696 | -2.236453 |
| WASF1      | -1.927115 | 8.9106671 | -3.362409 | 0.0046051 | 0.0266307 | -2.240864 |
| NANP       | -1.177544 | 4.0863904 | -3.361148 | 0.0046167 | 0.0266687 | -2.243298 |
| CBX1       | -1.033014 | 8.7541519 | -3.356354 | 0.0046611 | 0.0267938 | -2.252553 |
| COPS4      | -1.309267 | 4.9131244 | -3.354963 | 0.004674  | 0.0268473 | -2.255237 |
| TTC30A     | -1.033282 | 3.8245736 | -3.345863 | 0.0047597 | 0.0271112 | -2.272802 |
| RLIM       | -1.142733 | 7.5869115 | -3.345457 | 0.0047636 | 0.0271198 | -2.273585 |
| HSPA12A    | -1.005617 | 7.3266839 | -3.342522 | 0.0047916 | 0.0271845 | -2.27925  |
| SPOP       | -1.036432 | 7.3876407 | -3.340495 | 0.004811  | 0.02724   | -2.283159 |
| ANXA3      | -1.867277 | 3.7971301 | -3.340051 | 0.0048152 | 0.0272531 | -2.284016 |
| SLC10A2    | -1.09028  | 4.2194584 | -3.339682 | 0.0048188 | 0.0272657 | -2.284729 |
| LOC1019274 | -1.017764 | 2.9318788 | -3.337057 | 0.0048441 | 0.0273161 | -2.289794 |
| FABP5      | -1.000599 | 7.9673819 | -3.331847 | 0.0048948 | 0.027445  | -2.299845 |
| PCNP       | -1.022537 | 6.9284769 | -3.330807 | 0.0049049 | 0.027487  | -2.301852 |
| GPR158     | -1.640488 | 8.1477995 | -3.329234 | 0.0049204 | 0.0275207 | -2.304887 |
| FAM220A    | -1.63103  | 6.6015771 | -3.326078 | 0.0049515 | 0.0276342 | -2.310973 |
| EIF1AY     | -1.455043 | 3.1427191 | -3.325038 | 0.0049618 | 0.0276639 | -2.31298  |
| FRMPD4     | -1.435401 | 6.5583164 | -3.32383  | 0.0049737 | 0.0276981 | -2.31531  |
| MUT        | -1.371802 | 6.8357318 | -3.322043 | 0.0049915 | 0.0277517 | -2.318756 |
| APOBEC4    | -1.327115 | 4.5227499 | -3.320338 | 0.0050085 | 0.0278313 | -2.322045 |

|            |           |           |           |           |           |           |
|------------|-----------|-----------|-----------|-----------|-----------|-----------|
| ARPC3      | -1.095604 | 7.2088401 | -3.318599 | 0.005026  | 0.0278897 | -2.325398 |
| CRYM       | -1.112182 | 9.6302227 | -3.316209 | 0.00505   | 0.027978  | -2.330007 |
| LOC100506C | -1.00722  | 2.8331134 | -3.315907 | 0.005053  | 0.0279798 | -2.33059  |
| DLD        | -1.111407 | 5.5792633 | -3.312472 | 0.0050878 | 0.0280584 | -2.337212 |
| BBS10      | -1.095196 | 3.8109515 | -3.308162 | 0.0051318 | 0.0282063 | -2.345523 |
| SCN2A      | -1.152808 | 8.7593929 | -3.302061 | 0.0051947 | 0.0284027 | -2.357283 |
| LYSMD4     | -1.00755  | 5.4025543 | -3.297971 | 0.0052373 | 0.0285573 | -2.365166 |
| PRIMA1     | -1.328239 | 5.8161237 | -3.297737 | 0.0052397 | 0.0285573 | -2.365617 |
| PDHX       | -1.447857 | 6.3104153 | -3.297417 | 0.005243  | 0.0285622 | -2.366234 |
| SELL       | -1.157805 | 3.5291505 | -3.296851 | 0.005249  | 0.0285622 | -2.367324 |
| TMEM161B-A | -1.162892 | 6.4746398 | -3.296851 | 0.005249  | 0.0285622 | -2.367324 |
| NELL2      | -1.584767 | 9.1669324 | -3.293161 | 0.0052878 | 0.0286709 | -2.374436 |
| MRPL54     | -1.226372 | 5.8828291 | -3.291481 | 0.0053055 | 0.0287173 | -2.377673 |
| C6orf106   | -1.027009 | 7.7693967 | -3.290239 | 0.0053187 | 0.0287582 | -2.380067 |
| TMEM38A    | -1.04534  | 5.6697232 | -3.286272 | 0.005361  | 0.0289047 | -2.38771  |
| NADK2-AS1  | -1.17201  | 4.9069291 | -3.285041 | 0.0053742 | 0.0289448 | -2.39008  |
| TMEM5      | -1.135785 | 4.4745318 | -3.284112 | 0.0053842 | 0.0289448 | -2.39187  |
| NDFIP1     | -1.366371 | 8.2195216 | -3.280824 | 0.0054196 | 0.0290428 | -2.398204 |
| RAN        | -1.01118  | 7.1705748 | -3.279315 | 0.005436  | 0.029077  | -2.401112 |
| SPA17      | -1.017243 | 5.5443668 | -3.277398 | 0.0054568 | 0.0291354 | -2.404804 |
| LINC00616  | 1.0493897 | 4.4391507 | 3.2741438 | 0.0054924 | 0.0292717 | -2.411071 |
| GSKIP      | -1.538875 | 6.495657  | -3.272836 | 0.0055067 | 0.0293101 | -2.41359  |
| LOC1019292 | -1.037479 | 3.7241362 | -3.272551 | 0.0055099 | 0.0293191 | -2.414139 |
| SPRYD4     | -1.105725 | 6.2671973 | -3.267887 | 0.0055614 | 0.0294646 | -2.423119 |
| TMEM251    | -1.245958 | 3.3733423 | -3.258122 | 0.0056709 | 0.0298191 | -2.441917 |
| MAGEH1     | -1.388929 | 7.4053295 | -3.256016 | 0.0056948 | 0.029891  | -2.445972 |
| HOMER1     | -1.200099 | 7.0025895 | -3.255499 | 0.0057006 | 0.0298911 | -2.446966 |
| CCDC113    | -1.002572 | 7.0193461 | -3.249133 | 0.0057736 | 0.0301344 | -2.459218 |
| TXNDC12    | -1.383387 | 8.5215013 | -3.243423 | 0.0058397 | 0.0303097 | -2.470203 |
| DHRS7B     | -1.046837 | 7.096107  | -3.240505 | 0.0058738 | 0.0304404 | -2.475817 |
| MDH1       | -1.121623 | 9.2959303 | -3.239281 | 0.0058882 | 0.0304917 | -2.478171 |
| BIRC2      | -1.370765 | 6.5071736 | -3.238732 | 0.0058947 | 0.0305174 | -2.479227 |
| JAGN1      | -1.011532 | 6.9957216 | -3.235013 | 0.0059386 | 0.0306299 | -2.48638  |
| STXBP5     | -1.160107 | 5.4461731 | -3.233431 | 0.0059573 | 0.0306944 | -2.489422 |
| SNX30      | -1.551299 | 5.703865  | -3.230605 | 0.005991  | 0.0307894 | -2.494857 |
| TREM1      | -1.01525  | 3.4604238 | -3.230518 | 0.0059921 | 0.0307894 | -2.495025 |
| RXFP1      | -1.552054 | 5.9212292 | -3.230244 | 0.0059954 | 0.0307894 | -2.49555  |
| SLITRK1    | -1.190344 | 7.7417266 | -3.226941 | 0.006035  | 0.0308845 | -2.501902 |
| DHCR24     | -1.292437 | 8.1918471 | -3.22646  | 0.0060408 | 0.0308907 | -2.502826 |
| GHET1      | 1.0627045 | 4.0118098 | 3.225939  | 0.0060471 | 0.0309077 | -2.503828 |
| AMPH       | -1.316151 | 8.4454997 | -3.224322 | 0.0060666 | 0.030962  | -2.506937 |
| DNAJC6     | -1.262238 | 6.8150491 | -3.217189 | 0.0061536 | 0.0312569 | -2.520648 |
| SLC25A3P1  | 1.6607095 | 3.8145209 | 3.2166419 | 0.0061603 | 0.0312685 | -2.521699 |
| SLC30A10   | -1.024471 | 3.2990566 | -3.215651 | 0.0061725 | 0.0312975 | -2.523603 |
| LOC1001302 | -1.283092 | 3.6943758 | -3.215092 | 0.0061794 | 0.0313065 | -2.524678 |
| CSGALNACT2 | -1.076076 | 5.5607699 | -3.214578 | 0.0061858 | 0.0313211 | -2.525664 |
| EEFSEC     | -1.0688   | 6.1105224 | -3.213961 | 0.0061934 | 0.031348  | -2.526851 |
| SYNPR      | -1.413369 | 8.5937641 | -3.212416 | 0.0062125 | 0.0313846 | -2.529819 |
| ABRACL     | -1.146565 | 6.4487437 | -3.197591 | 0.006399  | 0.0319638 | -2.558299 |
| SDCBP      | -1.333087 | 8.1515257 | -3.195185 | 0.0064298 | 0.0320628 | -2.562917 |
| ST8SIA1    | -1.086855 | 4.3870232 | -3.188018 | 0.0065224 | 0.0323589 | -2.576678 |

|            |           |           |           |           |           |           |
|------------|-----------|-----------|-----------|-----------|-----------|-----------|
| KCNT2      | -1.232995 | 4.9659437 | -3.186113 | 0.0065472 | 0.032412  | -2.580336 |
| COX14      | -1.015801 | 7.2349033 | -3.183815 | 0.0065773 | 0.032495  | -2.584746 |
| RAB38      | -1.009263 | 2.9181237 | -3.182459 | 0.0065951 | 0.0325619 | -2.587348 |
| SH3GL2     | -1.207561 | 9.035761  | -3.172097 | 0.0067329 | 0.033003  | -2.60723  |
| LOC1019291 | -1.044701 | 4.2672648 | -3.170523 | 0.006754  | 0.0330513 | -2.610248 |
| BEX1       | -1.323618 | 9.9801636 | -3.169842 | 0.0067632 | 0.0330805 | -2.611556 |
| KIAA1045   | -1.11874  | 7.3489979 | -3.166879 | 0.0068033 | 0.0331813 | -2.617238 |
| LINC01361  | -1.09927  | 3.7436237 | -3.163657 | 0.0068472 | 0.0333427 | -2.623417 |
| RABGGTB    | -1.009807 | 6.8482115 | -3.159291 | 0.006907  | 0.0335401 | -2.631788 |
| NAA30      | -1.106883 | 5.9634295 | -3.156959 | 0.0069393 | 0.0336538 | -2.63626  |
| TRIL       | -1.558577 | 5.7632961 | -3.155396 | 0.0069609 | 0.0337089 | -2.639256 |
| FBXL2      | -1.131279 | 7.3614844 | -3.149747 | 0.0070398 | 0.0339088 | -2.650081 |
| DGKI       | -1.226048 | 6.9597946 | -3.141261 | 0.0071599 | 0.0342161 | -2.666341 |
| MARS2      | -1.069663 | 6.9288476 | -3.141186 | 0.007161  | 0.0342161 | -2.666484 |
| RANBP6     | -1.208602 | 6.1939735 | -3.140153 | 0.0071757 | 0.0342546 | -2.668463 |
| LHFP       | -1.158171 | 7.0123223 | -3.139326 | 0.0071876 | 0.0342712 | -2.670048 |
| EXOSC6     | -1.108048 | 6.1267558 | -3.134953 | 0.0072505 | 0.0344909 | -2.678423 |
| SRD5A1     | -1.219928 | 5.4081374 | -3.131538 | 0.0073    | 0.0346621 | -2.684962 |
| MRPL13     | -1.161502 | 5.1700486 | -3.12539  | 0.0073901 | 0.0349364 | -2.696732 |
| RAB9B      | -1.586085 | 7.2398854 | -3.125373 | 0.0073903 | 0.0349364 | -2.696763 |
| PPP1R14A   | -1.782943 | 6.6425139 | -3.122935 | 0.0074263 | 0.0350051 | -2.701429 |
| PADI3      | -1.03294  | 3.520929  | -3.111794 | 0.007593  | 0.0354284 | -2.722746 |
| GTF2I      | -1.341957 | 8.6829266 | -3.111668 | 0.0075949 | 0.0354292 | -2.722986 |
| LINC00888  | -1.292646 | 6.7350124 | -3.109894 | 0.0076219 | 0.0355143 | -2.726381 |
| ZCCHC9     | -1.279303 | 5.1100353 | -3.107539 | 0.0076577 | 0.0356164 | -2.730883 |
| C11orf74   | -1.504374 | 5.9360197 | -3.106564 | 0.0076726 | 0.0356695 | -2.732749 |
| RTN1       | -1.032    | 11.689144 | -3.10557  | 0.0076878 | 0.0356996 | -2.73465  |
| SMIM24     | -1.612789 | 5.8702902 | -3.104595 | 0.0077028 | 0.0357528 | -2.736513 |
| FUNDC2     | -1.058473 | 6.5968334 | -3.102076 | 0.0077415 | 0.0358595 | -2.74133  |
| MTERF3     | -1.280313 | 5.88018   | -3.098167 | 0.007802  | 0.0360664 | -2.748801 |
| ARHGAP5-AS | -1.061351 | 7.2636348 | -3.097979 | 0.007805  | 0.0360718 | -2.749162 |
| BNIP2      | -1.079864 | 4.8000083 | -3.09759  | 0.007811  | 0.0360916 | -2.749905 |
| WBP4       | -1.022629 | 6.804627  | -3.097215 | 0.0078169 | 0.0361063 | -2.750621 |
| MIRLET7DHG | -1.133949 | 4.1790556 | -3.095465 | 0.0078442 | 0.0361956 | -2.753966 |
| FNBP1L     | -1.222375 | 6.1177479 | -3.094678 | 0.0078565 | 0.0362361 | -2.755471 |
| GNG10      | -1.041751 | 7.7726705 | -3.092536 | 0.0078901 | 0.0362847 | -2.759563 |
| SYNC       | -1.230367 | 3.5494048 | -3.08668  | 0.0079826 | 0.0365953 | -2.770751 |
| NME1       | -1.23371  | 7.5351181 | -3.085536 | 0.0080009 | 0.0366419 | -2.772937 |
| RAI2       | -1.025505 | 5.085145  | -3.084495 | 0.0080175 | 0.0366727 | -2.774925 |
| LPPR4      | -1.321868 | 5.6769074 | -3.083145 | 0.0080391 | 0.0367433 | -2.777503 |
| TMEM128    | -1.275322 | 5.3356044 | -3.082979 | 0.0080417 | 0.0367433 | -2.777821 |
| ZNF432     | -1.056885 | 5.2173096 | -3.081824 | 0.0080602 | 0.0367944 | -2.780026 |
| PELI3      | -1.14696  | 7.2229199 | -3.078633 | 0.0081116 | 0.036963  | -2.78612  |
| MAT2B      | -1.226216 | 6.68102   | -3.065296 | 0.0083299 | 0.037448  | -2.811575 |
| MAS1       | -1.187549 | 4.7370817 | -3.062637 | 0.0083742 | 0.0375571 | -2.816648 |
| EIF2AK2    | -1.0855   | 6.8972703 | -3.052792 | 0.0085399 | 0.0380917 | -2.835425 |
| POMP       | -1.210533 | 6.1429861 | -3.049425 | 0.0085974 | 0.0382728 | -2.841844 |
| SLC12A5    | -1.014622 | 8.2779519 | -3.046564 | 0.0086464 | 0.0384078 | -2.847296 |
| FOXO2-AS1  | -1.075923 | 3.9638803 | -3.046177 | 0.0086531 | 0.038429  | -2.848033 |
| TATDN1     | -1.165161 | 6.9800719 | -3.043919 | 0.0086921 | 0.038502  | -2.852336 |
| NGFRAP1    | -1.071331 | 9.6665227 | -3.043243 | 0.0087038 | 0.038512  | -2.853625 |

|            |           |           |           |           |           |           |
|------------|-----------|-----------|-----------|-----------|-----------|-----------|
| PEX3       | -1.002092 | 5.2577981 | -3.042667 | 0.0087138 | 0.0385478 | -2.854722 |
| SULF1      | -1.034083 | 5.0658758 | -3.042478 | 0.008717  | 0.038554  | -2.855083 |
| LUZP2      | -1.124586 | 4.5170196 | -3.038779 | 0.0087814 | 0.0387132 | -2.862129 |
| ZBTB2      | -1.041264 | 4.2528579 | -3.038089 | 0.0087935 | 0.0387331 | -2.863445 |
| PRDX3      | -1.217777 | 6.94878   | -3.03741  | 0.0088054 | 0.0387771 | -2.864737 |
| PSMA5      | -1.11463  | 6.114016  | -3.035796 | 0.0088337 | 0.0388309 | -2.867812 |
| TMEM14A    | -1.520896 | 7.8666978 | -3.035747 | 0.0088346 | 0.0388309 | -2.867905 |
| BZRAP1-AS1 | -1.088021 | 5.3127521 | -3.035528 | 0.0088384 | 0.0388309 | -2.868323 |
| TOMM5      | -1.009458 | 6.8308274 | -3.035429 | 0.0088402 | 0.0388309 | -2.86851  |
| GPR12      | -1.099164 | 5.0779138 | -3.034841 | 0.0088505 | 0.0388478 | -2.86963  |
| LRP1B      | -1.324034 | 5.1652496 | -3.026548 | 0.0089978 | 0.0392331 | -2.88542  |
| DACH2      | -1.462734 | 5.2792273 | -3.022568 | 0.0090693 | 0.0394468 | -2.892997 |
| GAF2       | -1.022026 | 5.1819191 | -3.022349 | 0.0090732 | 0.0394556 | -2.893414 |
| SNX17      | -1.143301 | 7.3223316 | -3.020889 | 0.0090996 | 0.0394626 | -2.896192 |
| DPY19L2    | -1.255149 | 5.0684388 | -3.019502 | 0.0091248 | 0.0395335 | -2.89883  |
| ZNF532     | -1.031584 | 7.5597783 | -3.019205 | 0.0091302 | 0.039535  | -2.899395 |
| ESYT2      | -1.077454 | 5.9866913 | -3.018339 | 0.0091459 | 0.0395865 | -2.901044 |
| NUPL1      | -1.054836 | 4.9065859 | -3.017796 | 0.0091558 | 0.0396041 | -2.902077 |
| CRYZ       | -1.527747 | 6.6817877 | -3.015514 | 0.0091974 | 0.0396919 | -2.906417 |
| UTY        | -1.247341 | 5.1457822 | -3.008165 | 0.0093328 | 0.0400885 | -2.920393 |
| MAP2K1     | -1.186033 | 8.4606665 | -3.005314 | 0.0093859 | 0.0402    | -2.925815 |
| TMEM60     | -1.405256 | 5.5829318 | -3.004401 | 0.009403  | 0.0402327 | -2.92755  |
| GNAI1      | -1.216754 | 6.0877183 | -3.000433 | 0.0094774 | 0.0404225 | -2.935092 |
| DCAF17     | -1.136606 | 4.6713994 | -2.995089 | 0.0095786 | 0.0406386 | -2.945244 |
| TMEM246    | -1.055887 | 7.8615533 | -2.990997 | 0.0096569 | 0.0408138 | -2.953017 |
| UHRF2      | -1.070662 | 6.9537047 | -2.98512  | 0.0097703 | 0.0411149 | -2.964177 |
| AGPAT9     | -1.753641 | 5.2801287 | -2.981818 | 0.0098346 | 0.0413091 | -2.970446 |
| PGM3       | -1.223418 | 5.4512619 | -2.976086 | 0.0099473 | 0.0415604 | -2.981323 |
| STMN2      | -1.019879 | 11.064089 | -2.971289 | 0.0100425 | 0.0418223 | -2.990421 |
| ZNF586     | -1.078264 | 5.4910806 | -2.96965  | 0.0100753 | 0.0419303 | -2.99353  |
| PANK1      | -1.083409 | 3.6501122 | -2.967927 | 0.0101098 | 0.0420079 | -2.996799 |
| PRR18      | -1.287712 | 5.5139341 | -2.964192 | 0.0101851 | 0.0422272 | -3.00388  |
| MGC39584   | -1.117914 | 4.0087818 | -2.958347 | 0.010304  | 0.0424954 | -3.014957 |
| ACTR3      | -1.061153 | 6.7291722 | -2.957998 | 0.0103111 | 0.0425163 | -3.015619 |
| HERC2      | -1.153221 | 8.0531907 | -2.951303 | 0.0104491 | 0.0428606 | -3.028302 |
| PTPRT      | -1.11981  | 6.7689998 | -2.944959 | 0.0105815 | 0.04311   | -3.040315 |
| JKAMP      | -1.350252 | 5.8707115 | -2.932509 | 0.0108462 | 0.043744  | -3.063872 |
| LOC157562  | -1.330696 | 7.0170757 | -2.931799 | 0.0108615 | 0.0437664 | -3.065216 |
| CCDC160    | -1.216311 | 3.7808106 | -2.931755 | 0.0108625 | 0.0437664 | -3.065299 |
| WWP1       | -1.155159 | 6.1779987 | -2.927143 | 0.0109623 | 0.0440386 | -3.074019 |
| LOC1005056 | -1.23009  | 4.4879921 | -2.926435 | 0.0109777 | 0.0440686 | -3.075358 |
| UBR7       | -1.043849 | 7.0772669 | -2.926075 | 0.0109855 | 0.0440686 | -3.076038 |
| TPTE2P6    | -1.094371 | 2.9001978 | -2.925712 | 0.0109935 | 0.0440686 | -3.076724 |
| IQCF5      | -1.078578 | 3.4929696 | -2.925051 | 0.0110079 | 0.0441074 | -3.077975 |
| TOP2B      | -1.024288 | 8.1802253 | -2.918337 | 0.0111554 | 0.0444134 | -3.090662 |
| NR3C2      | -1.147085 | 6.8681918 | -2.913861 | 0.0112549 | 0.0446616 | -3.099118 |
| SST        | -1.163128 | 5.6538236 | -2.908197 | 0.011382  | 0.0449527 | -3.109813 |
| EXOSC9     | -1.174052 | 6.3928434 | -2.907304 | 0.0114022 | 0.0450103 | -3.111499 |
| RGS4       | -1.239553 | 8.0552576 | -2.906839 | 0.0114127 | 0.0450237 | -3.112377 |
| RPL22L1    | 1.0854725 | 3.9878195 | 2.8917935 | 0.0117581 | 0.0457184 | -3.14076  |
| KAT7       | -1.148554 | 7.548148  | -2.889385 | 0.0118143 | 0.04587   | -3.145301 |

|            |           |           |           |           |           |           |
|------------|-----------|-----------|-----------|-----------|-----------|-----------|
| LOC641515  | -1.048008 | 2.7113193 | -2.887147 | 0.0118668 | 0.0459317 | -3.149519 |
| COPS5      | -1.300791 | 5.4919136 | -2.8861   | 0.0118914 | 0.0459712 | -3.151491 |
| VPS13A     | -1.025844 | 5.7852352 | -2.885455 | 0.0119066 | 0.0460075 | -3.152706 |
| TXLNG      | -1.097261 | 6.3736438 | -2.883565 | 0.0119513 | 0.0461257 | -3.156269 |
| EIF1AX     | -1.003917 | 6.5918452 | -2.882512 | 0.0119763 | 0.0461421 | -3.158252 |
| PET117     | -1.086929 | 5.2426759 | -2.879256 | 0.0120537 | 0.0463096 | -3.164386 |
| KTN1       | -1.04382  | 6.5468028 | -2.876721 | 0.0121144 | 0.0464419 | -3.16916  |
| DPY19L2P2  | -1.572902 | 5.7589908 | -2.873152 | 0.0122003 | 0.0466227 | -3.175879 |
| LOC388882  | -1.00219  | 4.9666091 | -2.8697   | 0.012284  | 0.0467549 | -3.182377 |
| SUDS3      | -1.019518 | 6.5677759 | -2.867435 | 0.0123392 | 0.0468471 | -3.186639 |
| C9orf57    | -1.045827 | 2.5125409 | -2.865214 | 0.0123935 | 0.0469664 | -3.190818 |
| NEK7       | -1.313163 | 5.8929    | -2.856658 | 0.0126051 | 0.04743   | -3.206908 |
| BPGM       | -1.089466 | 5.9936326 | -2.85652  | 0.0126086 | 0.04743   | -3.207168 |
| ABCC12     | -1.148759 | 4.8604584 | -2.855682 | 0.0126295 | 0.0474738 | -3.208743 |
| PGAP1      | -1.046227 | 5.665464  | -2.848411 | 0.0128125 | 0.0479413 | -3.222406 |
| RHOBTB1    | -1.347263 | 5.4136889 | -2.844898 | 0.0129018 | 0.0481171 | -3.229003 |
| LOC1009967 | -1.32389  | 6.1410315 | -2.839949 | 0.0130287 | 0.0484226 | -3.238295 |
| NEGR1      | -1.345747 | 6.7450469 | -2.836393 | 0.0131206 | 0.0485877 | -3.244969 |
| AUH        | -1.891243 | 5.8998755 | -2.829231 | 0.0133076 | 0.0489086 | -3.258405 |
| TMC05B     | -1.04138  | 4.7603117 | -2.827928 | 0.0133419 | 0.0489904 | -3.260849 |
| USP9Y      | -1.765187 | 4.5916384 | -2.82761  | 0.0133503 | 0.0489952 | -3.261446 |
| APLNR      | 1.6755598 | 4.9665789 | 2.8259222 | 0.0133949 | 0.049073  | -3.26461  |
| PSMB6      | -1.239639 | 6.492839  | -2.825858 | 0.0133966 | 0.049073  | -3.26473  |
| C3orf14    | -1.272224 | 6.0944801 | -2.819761 | 0.013559  | 0.049424  | -3.276158 |
| LOC1005055 | -1.187749 | 5.0493673 | -2.817113 | 0.0136301 | 0.0496036 | -3.281119 |
| SERPINI1   | -1.688345 | 9.270398  | -2.816194 | 0.0136549 | 0.0496673 | -3.28284  |
| CADPS2     | -1.457863 | 8.7595312 | -2.815302 | 0.0136789 | 0.0497342 | -3.284511 |
| CNRIP1     | -1.028279 | 9.2911085 | -2.814613 | 0.0136976 | 0.0497783 | -3.285801 |
| PEX5L      | -1.122184 | 6.9736669 | -2.812377 | 0.0137582 | 0.0498923 | -3.289988 |
| SDR16C5    | -1.237167 | 4.5889862 | -2.8118   | 0.0137739 | 0.0499314 | -3.291068 |
