# Supplementary material for: Identification and Experimental Validation of Marker Genes between Diabetes and Alzheimer’s Disease
Source: Hindawi journal article supplement (doi:10.1155/2022/8122532), 2022-01-01
Supplement: f3 [file 8122532.f3.pdf]

| Gene       | logFC     | AveExpr   | t         | P. Value | adj. P. Val | B         |
|------------|-----------|-----------|-----------|----------|-------------|-----------|
| SPP1       | 2.0520812 | 12.234875 | 9.1888693 | 2.08E-12 | 5.39E-08    | 17.78305  |
| LOC283737  | -2.151132 | 5.2802963 | -9.051435 | 3.36E-12 | 5.39E-08    | 17.33423  |
| SPON2      | -1.281271 | 8.7510405 | -8.35483  | 3.99E-11 | 4.27E-07    | 15.026724 |
| FAM5B      | -1.212189 | 8.2898071 | -8.162729 | 7.95E-11 | 6.37E-07    | 14.381805 |
| RBM3       | -1.915815 | 6.8847866 | -7.693333 | 4.32E-10 | 1.38E-06    | 12.79325  |
| TARBP1     | -1.267118 | 8.2237624 | -7.592901 | 6.22E-10 | 1.57E-06    | 12.451378 |
| BACE2      | 1.2418388 | 8.6939343 | 7.58651   | 6.37E-10 | 1.57E-06    | 12.429604 |
| ANLN       | 1.4532455 | 8.0662264 | 7.3870418 | 1.31E-09 | 2.81E-06    | 11.748896 |
| C17orf108  | -1.383909 | 11.747311 | -7.082557 | 3.98E-09 | 7.06E-06    | 10.706566 |
| LOC728052  | -1.059815 | 9.9400615 | -7.058733 | 4.34E-09 | 7.06E-06    | 10.62489  |
| LOC1005071 | -1.006503 | 8.6626823 | -7.054599 | 4.40E-09 | 7.06E-06    | 10.610719 |
| MYL5       | -1.362834 | 7.8931358 | -6.88054  | 8.30E-09 | 1.16E-05    | 10.013668 |
| EFHB       | -1.294824 | 4.5466947 | -6.857754 | 9.02E-09 | 1.21E-05    | 9.9354832 |
| LOC644189  | -1.261264 | 8.1110707 | -6.754465 | 1.31E-08 | 1.56E-05    | 9.581027  |
| C4A        | 1.5420636 | 6.0352392 | 6.7451284 | 1.36E-08 | 1.56E-05    | 9.5489868 |
| PPP1R32    | -1.238324 | 4.0141614 | -6.735259 | 1.41E-08 | 1.56E-05    | 9.5151174 |
| XLOC_00347 | -1.977003 | 7.2578762 | -6.725633 | 1.46E-08 | 1.56E-05    | 9.4820856 |
| XLOC_0006C | 1.3998463 | 9.087029  | 6.6597342 | 1.86E-08 | 1.86E-05    | 9.2559549 |
| CYP1B1-AS1 | -1.090194 | 5.3398124 | -6.64335  | 1.97E-08 | 1.87E-05    | 9.1997383 |
| CCT6B      | -1.887925 | 5.3678913 | -6.642218 | 1.98E-08 | 1.87E-05    | 9.1958551 |
| LOC1002893 | -1.175403 | 6.2172455 | -6.601251 | 2.30E-08 | 1.94E-05    | 9.055307  |
| XLOC_00695 | -2.177677 | 5.3757124 | -6.577671 | 2.50E-08 | 1.96E-05    | 8.9744193 |
| NOXA1      | -1.05421  | 9.3125655 | -6.508104 | 3.22E-08 | 2.15E-05    | 8.7358415 |
| LOC1005073 | -1.021142 | 7.6130842 | -6.492756 | 3.41E-08 | 2.20E-05    | 8.6832187 |
| XLOC_12_01 | -1.037756 | 9.2800888 | -6.481731 | 3.55E-08 | 2.22E-05    | 8.6454245 |
| ARMCX3-AS1 | 1.1554125 | 5.5947789 | 6.4777289 | 3.60E-08 | 2.22E-05    | 8.6317041 |
| MID1IP1    | 1.0737996 | 12.193662 | 6.4674797 | 3.74E-08 | 2.26E-05    | 8.5965712 |
| FCGBP      | 2.2374355 | 8.0675388 | 6.4468653 | 4.03E-08 | 2.27E-05    | 8.5259165 |
| XLOC_00093 | -1.192874 | 5.0377069 | -6.446192 | 4.04E-08 | 2.27E-05    | 8.5236082 |
| CARTPT     | -2.8456   | 8.9455249 | -6.421853 | 4.41E-08 | 2.36E-05    | 8.4402042 |
| BOK        | 1.0721068 | 8.2867296 | 6.405742  | 4.68E-08 | 2.42E-05    | 8.3850059 |
| TCL1B      | 1.2930114 | 5.9721604 | 6.3752833 | 5.22E-08 | 2.54E-05    | 8.2806731 |
| MILR1      | 1.1921958 | 6.345716  | 6.309098  | 6.64E-08 | 3.04E-05    | 8.0540811 |
| FAM167B    | 1.7002702 | 7.3508721 | 6.3026704 | 6.80E-08 | 3.04E-05    | 8.0320847 |
| XLOC_01428 | -1.192598 | 7.2060016 | -6.292712 | 7.05E-08 | 3.07E-05    | 7.9980094 |
| CIRBP      | -1.17205  | 9.5415149 | -6.29131  | 7.08E-08 | 3.07E-05    | 7.9932112 |
| LOC1005074 | -1.005677 | 6.5996217 | -6.220936 | 9.14E-08 | 3.86E-05    | 7.7525387 |
| LINC00473  | -1.938152 | 5.786114  | -6.215019 | 9.34E-08 | 3.89E-05    | 7.7323166 |
| XLOC_12_01 | 1.3180072 | 6.5362093 | 6.1891957 | 1.03E-07 | 4.17E-05    | 7.6440718 |
| FSD2       | 1.2286465 | 8.7074876 | 6.1472895 | 1.19E-07 | 4.56E-05    | 7.5009467 |
| GOLGA6C    | -1.051168 | 9.7316425 | -6.13295  | 1.26E-07 | 4.71E-05    | 7.4519971 |
| MAFF       | 1.5950662 | 8.0157257 | 6.1250452 | 1.29E-07 | 4.72E-05    | 7.4250157 |
| KRBOX1     | -1.183034 | 5.7018944 | -6.093292 | 1.45E-07 | 5.00E-05    | 7.316677  |
| LOC151760  | -1.411734 | 3.9912947 | -6.08917  | 1.47E-07 | 5.00E-05    | 7.3026207 |
| ACOT4      | -1.4064   | 6.9439699 | -6.087898 | 1.48E-07 | 5.00E-05    | 7.2982798 |
| RASAL3     | 1.1463335 | 8.3029055 | 6.0786383 | 1.53E-07 | 5.06E-05    | 7.2667036 |
| LOC1002876 | -1.122806 | 7.3540227 | -6.023094 | 1.87E-07 | 5.56E-05    | 7.0774078 |
| ICA1       | -1.057228 | 8.3279136 | -6.020384 | 1.89E-07 | 5.56E-05    | 7.0681754 |
| SNX31      | 1.4543877 | 6.0207388 | 5.9949274 | 2.07E-07 | 5.98E-05    | 6.9814983 |
| C1QC       | 1.4625708 | 7.7846915 | 5.9928014 | 2.09E-07 | 5.98E-05    | 6.9742614 |

|            |            |            |            |           |            |            |
|------------|------------|------------|------------|-----------|------------|------------|
| BN1PL      | 1. 0739637 | 3. 263232  | 5. 9873003 | 2. 13E-07 | 5. 99E-05  | 6. 9555376 |
| C4B        | 1. 2196102 | 10. 517026 | 5. 9550021 | 2. 39E-07 | 6. 50E-05  | 6. 8456524 |
| FRMPD2     | -2. 399961 | 6. 5630089 | -5. 951437 | 2. 42E-07 | 6. 52E-05  | 6. 8335271 |
| RNF165     | -1. 407522 | 4. 6376861 | -5. 947222 | 2. 46E-07 | 6. 52E-05  | 6. 8191956 |
| C5AR1      | 1. 5153221 | 4. 8760543 | 5. 9299042 | 2. 62E-07 | 6. 89E-05  | 6. 7603212 |
| CAMKK2     | -1. 164115 | 9. 3484168 | -5. 918424 | 2. 73E-07 | 7. 06E-05  | 6. 7213077 |
| SLAMF8     | 1. 9950276 | 5. 6618469 | 5. 912142  | 2. 79E-07 | 7. 17E-05  | 6. 6999622 |
| CHORDC1    | 1. 0274175 | 8. 5148778 | 5. 9091892 | 2. 82E-07 | 7. 17E-05  | 6. 6899306 |
| RUNX3      | 1. 0169632 | 6. 3568838 | 5. 8928804 | 2. 99E-07 | 7. 22E-05  | 6. 6345377 |
| Clorf145   | -1. 30745  | 3. 7420706 | -5. 890641 | 3. 02E-07 | 7. 22E-05  | 6. 6269328 |
| LOC1002331 | 1. 1066349 | 6. 6894649 | 5. 8897794 | 3. 03E-07 | 7. 22E-05  | 6. 6240079 |
| CRH        | -2. 712227 | 6. 5990026 | -5. 859278 | 3. 38E-07 | 7. 95E-05  | 6. 5204799 |
| MS4A14     | 1. 192615  | 4. 4272193 | 5. 8471649 | 3. 53E-07 | 7. 97E-05  | 6. 4793893 |
| LOC1005061 | -1. 550994 | 4. 45323   | -5. 782853 | 4. 45E-07 | 9. 31E-05  | 6. 2614564 |
| VGF        | -2. 045565 | 12. 956187 | -5. 779619 | 4. 50E-07 | 9. 31E-05  | 6. 250506  |
| FLJ31104   | -1. 384229 | 4. 7378151 | -5. 771525 | 4. 63E-07 | 9. 34E-05  | 6. 2231082 |
| SLC4A11    | 1. 0782355 | 7. 9121135 | 5. 764326  | 4. 75E-07 | 9. 53E-05  | 6. 1987476 |
| SAP25      | 1. 1906912 | 10. 357569 | 5. 7613396 | 4. 80E-07 | 9. 57E-05  | 6. 188643  |
| DRD2       | -1. 022964 | 7. 4883805 | -5. 758529 | 4. 85E-07 | 9. 61E-05  | 6. 1791339 |
| STX1A      | -1. 059314 | 9. 6413044 | -5. 738069 | 5. 22E-07 | 0. 0001009 | 6. 1099347 |
| ATOH7      | -1. 872099 | 4. 7922371 | -5. 733576 | 5. 31E-07 | 0. 0001016 | 6. 0947475 |
| HLA-DRB4   | 1. 1477236 | 7. 5392234 | 5. 7277505 | 5. 42E-07 | 0. 0001028 | 6. 0750548 |
| CDH19      | 1. 1081346 | 6. 5350272 | 5. 7019051 | 5. 94E-07 | 0. 000109  | 5. 9877346 |
| XLOC_01109 | -1. 692371 | 4. 1937218 | -5. 70013  | 5. 98E-07 | 0. 000109  | 5. 9817384 |
| THNSL1     | -1. 168068 | 7. 379729  | -5. 68915  | 6. 22E-07 | 0. 0001121 | 5. 9446667 |
| XLOC_00296 | -1. 083876 | 4. 7647884 | -5. 667255 | 6. 73E-07 | 0. 0001184 | 5. 8707826 |
| SCIN       | 1. 5873883 | 6. 9216565 | 5. 666693  | 6. 74E-07 | 0. 0001184 | 5. 8688856 |
| SLC7A7     | 1. 0773276 | 6. 3802202 | 5. 6658501 | 6. 76E-07 | 0. 0001184 | 5. 8660423 |
| TGFBI      | 1. 2366419 | 7. 8831419 | 5. 6568403 | 6. 99E-07 | 0. 0001209 | 5. 8356556 |
| LOC100131C | 1. 0173674 | 5. 2584821 | 5. 6501166 | 7. 16E-07 | 0. 0001227 | 5. 8129849 |
| GPM6A      | -1. 261596 | 12. 304789 | -5. 632948 | 7. 61E-07 | 0. 0001271 | 5. 7551204 |
| VSIG4      | 1. 6085064 | 9. 977252  | 5. 6219608 | 7. 91E-07 | 0. 0001309 | 5. 7181077 |
| XLOC_01054 | -1. 479219 | 4. 3958168 | -5. 616337 | 8. 07E-07 | 0. 0001328 | 5. 6991696 |
| SCG3       | -1. 121855 | 9. 3885977 | -5. 609877 | 8. 26E-07 | 0. 0001352 | 5. 677418  |
| XLOC_00196 | 1. 0961373 | 10. 90311  | 5. 6012381 | 8. 52E-07 | 0. 0001352 | 5. 6483382 |
| C6orf221   | -1. 197906 | 4. 3793481 | -5. 600446 | 8. 55E-07 | 0. 0001352 | 5. 6456707 |
| SERPINA3   | 1. 8211709 | 8. 0637955 | 5. 6003737 | 8. 55E-07 | 0. 0001352 | 5. 6454288 |
| NECAB2     | -1. 350431 | 8. 5799029 | -5. 596009 | 8. 68E-07 | 0. 0001359 | 5. 6307404 |
| C14orf79   | -1. 258989 | 4. 5038181 | -5. 565969 | 9. 67E-07 | 0. 0001442 | 5. 5297125 |
| LILRB1     | 1. 2485929 | 6. 9185951 | 5. 5554597 | 1. 00E-06 | 0. 0001477 | 5. 4943968 |
| PNMA5      | -1. 187454 | 11. 209903 | -5. 54848  | 1. 03E-06 | 0. 00015   | 5. 470949  |
| NEAT1      | 1. 2409596 | 8. 7616361 | 5. 5351858 | 1. 08E-06 | 0. 0001552 | 5. 4263052 |
| CTAG1A     | -1. 478562 | 4. 4885802 | -5. 523643 | 1. 12E-06 | 0. 0001584 | 5. 3875614 |
| STAB1      | 1. 1341773 | 6. 740128  | 5. 5202825 | 1. 14E-06 | 0. 0001586 | 5. 3762852 |
| XLOC_00488 | -1. 369848 | 4. 4568096 | -5. 515295 | 1. 16E-06 | 0. 0001599 | 5. 3595514 |
| LY96       | 1. 1197892 | 7. 5028487 | 5. 4824444 | 1. 30E-06 | 0. 0001735 | 5. 2494217 |
| CCDC102A   | 1. 1536463 | 6. 3423271 | 5. 4819993 | 1. 30E-06 | 0. 0001735 | 5. 2479308 |
| LOC1005089 | 1. 1822323 | 5. 7937744 | 5. 4750285 | 1. 34E-06 | 0. 0001771 | 5. 2245805 |
| KIAA1644   | -1. 021412 | 5. 8882348 | -5. 472286 | 1. 35E-06 | 0. 0001779 | 5. 2153943 |
| XLOC_12_OC | 1. 0787913 | 4. 1543824 | 5. 4674003 | 1. 37E-06 | 0. 0001779 | 5. 1990361 |
| CD163      | 2. 0765168 | 9. 3304475 | 5. 4639203 | 1. 39E-06 | 0. 0001791 | 5. 1873852 |

|            |           |           |           |          |           |           |
|------------|-----------|-----------|-----------|----------|-----------|-----------|
| HIST1H2AH  | 1.4333316 | 10.21649  | 5.4610565 | 1.40E-06 | 0.0001801 | 5.1777988 |
| LINC00467  | -1.066243 | 6.0361215 | -5.451142 | 1.45E-06 | 0.0001833 | 5.1446178 |
| LOC285540  | 1.0114533 | 6.4057591 | 5.4382509 | 1.52E-06 | 0.0001886 | 5.1014985 |
| GSTZ1      | -1.063693 | 6.143053  | -5.428027 | 1.58E-06 | 0.0001935 | 5.0673177 |
| UNC80      | -1.043148 | 7.2941191 | -5.411599 | 1.67E-06 | 0.0001989 | 5.0124234 |
| SCLT1      | -1.110048 | 6.6090879 | -5.410719 | 1.68E-06 | 0.0001989 | 5.0094842 |
| HES5       | -1.334195 | 8.7722659 | -5.407472 | 1.70E-06 | 0.0001989 | 4.9986394 |
| SERPINH1   | 1.4467219 | 9.5844603 | 5.4058397 | 1.71E-06 | 0.0001993 | 4.9931887 |
| HMHA1      | 1.0185613 | 10.595449 | 5.3930292 | 1.79E-06 | 0.0002065 | 4.950422  |
| MIA        | 1.7976113 | 4.8726396 | 5.3917153 | 1.80E-06 | 0.0002065 | 4.946037  |
| HIST1H2AK  | 1.0848656 | 9.5689453 | 5.375867  | 1.90E-06 | 0.0002122 | 4.8931655 |
| COL24A1    | -1.214338 | 6.4053711 | -5.367984 | 1.95E-06 | 0.0002146 | 4.8668816 |
| CAMK4      | -1.264041 | 7.0739977 | -5.356813 | 2.03E-06 | 0.0002201 | 4.8296492 |
| TSPAN7     | -1.14211  | 11.048988 | -5.352162 | 2.07E-06 | 0.0002217 | 4.8141525 |
| UGT8       | 1.090361  | 8.4562992 | 5.3485766 | 2.09E-06 | 0.0002223 | 4.8022109 |
| STYK1      | -1.330202 | 7.0308112 | -5.337975 | 2.17E-06 | 0.0002285 | 4.766909  |
| LOC1005075 | -1.036249 | 8.3220613 | -5.335459 | 2.19E-06 | 0.0002289 | 4.7585337 |
| SNORD114-2 | -1.001303 | 7.2068282 | -5.334748 | 2.20E-06 | 0.0002289 | 4.7561654 |
| MET        | -2.030302 | 8.9951245 | -5.325505 | 2.27E-06 | 0.0002346 | 4.7254054 |
| RCC1       | 1.1481401 | 5.2612426 | 5.3250744 | 2.27E-06 | 0.0002346 | 4.7239743 |
| XLOC_12_01 | -1.153764 | 4.6835502 | -5.285959 | 2.61E-06 | 0.0002577 | 4.5939563 |
| VASP       | 1.3195571 | 8.2968755 | 5.2788819 | 2.68E-06 | 0.0002627 | 4.5704593 |
| WDR86      | -1.086878 | 7.3197023 | -5.270279 | 2.76E-06 | 0.0002691 | 4.5419084 |
| MLIP       | -1.872747 | 7.531097  | -5.263545 | 2.83E-06 | 0.0002714 | 4.5195676 |
| MYBPH      | 1.5962551 | 6.1389776 | 5.2544958 | 2.92E-06 | 0.0002768 | 4.4895558 |
| MYO10      | 1.0218247 | 7.4206111 | 5.2510466 | 2.95E-06 | 0.0002775 | 4.478121  |
| FREM3      | -1.81741  | 4.9007073 | -5.246301 | 3.00E-06 | 0.00028   | 4.4623907 |
| XLOC_0145C | -1.11224  | 7.1514077 | -5.242663 | 3.04E-06 | 0.0002828 | 4.4503346 |
| CHRD12     | -1.086651 | 4.01156   | -5.238383 | 3.09E-06 | 0.000285  | 4.4361545 |
| SCN3B      | -1.116679 | 12.764888 | -5.237182 | 3.10E-06 | 0.000285  | 4.4321768 |
| ARMCX5     | -1.050274 | 7.9002092 | -5.233282 | 3.14E-06 | 0.0002873 | 4.4192576 |
| NPTX2      | -1.571051 | 9.0560163 | -5.230033 | 3.18E-06 | 0.0002878 | 4.4084967 |
| PVRL3-AS1  | -1.492175 | 5.3102783 | -5.229626 | 3.19E-06 | 0.0002878 | 4.4071502 |
| SDIM1      | -1.785077 | 7.2590092 | -5.217935 | 3.32E-06 | 0.0002973 | 4.3684475 |
| CCR5       | 1.1507951 | 6.8788268 | 5.2123084 | 3.39E-06 | 0.0003007 | 4.3498314 |
| PRSS35     | -1.495114 | 5.0109312 | -5.196931 | 3.57E-06 | 0.0003105 | 4.2989783 |
| LOC1005069 | 1.3086153 | 6.0941008 | 5.1893441 | 3.67E-06 | 0.0003126 | 4.2739031 |
| C17orf102  | -1.81322  | 6.8426698 | -5.189153 | 3.67E-06 | 0.0003126 | 4.2732727 |
| INHA       | -1.076813 | 4.259298  | -5.186889 | 3.70E-06 | 0.0003126 | 4.2657912 |
| LPIN3      | 1.3396978 | 8.5250154 | 5.1867614 | 3.70E-06 | 0.0003126 | 4.2653694 |
| EVI2B      | 1.1391221 | 6.4310121 | 5.1849781 | 3.73E-06 | 0.0003137 | 4.2594778 |
| LOC440040  | -1.381835 | 6.9587362 | -5.172099 | 3.90E-06 | 0.0003223 | 4.216946  |
| XLOC_00439 | -1.024565 | 3.7061021 | -5.156446 | 4.12E-06 | 0.0003371 | 4.165294  |
| MYOT       | 1.0976481 | 5.7022881 | 5.1541092 | 4.15E-06 | 0.0003381 | 4.1575854 |
| XLOC_12_OC | -1.82436  | 8.2448799 | -5.142135 | 4.33E-06 | 0.0003474 | 4.1181084 |
| GDF15      | 1.2308932 | 7.5880671 | 5.1420864 | 4.33E-06 | 0.0003474 | 4.1179473 |
| LOC285954  | -1.212534 | 4.8576895 | -5.140226 | 4.36E-06 | 0.0003488 | 4.1118154 |
| LOC729264  | -1.499979 | 5.4090437 | -5.135825 | 4.43E-06 | 0.0003498 | 4.0973136 |
| DOPEY1     | -1.034107 | 7.5997148 | -5.133129 | 4.47E-06 | 0.0003514 | 4.0884324 |
| LOC100653C | 1.1166815 | 5.4893253 | 5.1315936 | 4.49E-06 | 0.0003524 | 4.083375  |
| WNT10B     | -1.19347  | 8.1457008 | -5.130481 | 4.51E-06 | 0.0003528 | 4.0797092 |

|            |           |           |           |          |           |           |
|------------|-----------|-----------|-----------|----------|-----------|-----------|
| PLK2       | -1.110815 | 10.57441  | -5.129239 | 4.53E-06 | 0.0003528 | 4.0756194 |
| SPRYD7     | -1.008971 | 8.1955225 | -5.124923 | 4.60E-06 | 0.0003564 | 4.0614083 |
| PAMR1      | -1.07798  | 9.3292919 | -5.123064 | 4.63E-06 | 0.000357  | 4.0552855 |
| HMOX1      | 1.073439  | 9.3773625 | 5.1230492 | 4.63E-06 | 0.000357  | 4.0552374 |
| BFSP1      | -1.210536 | 6.8691304 | -5.12064  | 4.67E-06 | 0.0003575 | 4.0473064 |
| AQP1       | 1.0401721 | 8.1653084 | 5.1124886 | 4.80E-06 | 0.0003643 | 4.0204792 |
| ZBBX       | -1.43564  | 5.4264967 | -5.102056 | 4.98E-06 | 0.0003735 | 3.9861627 |
| STAT4      | -1.405588 | 7.2014089 | -5.100516 | 5.01E-06 | 0.0003746 | 3.9810988 |
| LOC283484  | -1.422144 | 5.8439509 | -5.094263 | 5.12E-06 | 0.0003799 | 3.9605413 |
| XLOC_12_OC | -1.181305 | 3.3909043 | -5.088417 | 5.23E-06 | 0.0003828 | 3.9413323 |
| XLOC_01253 | -1.829865 | 7.9847824 | -5.08049  | 5.37E-06 | 0.0003926 | 3.9152914 |
| FCGR2C     | 1.1441608 | 4.9696353 | 5.0679466 | 5.61E-06 | 0.0004056 | 3.8741104 |
| XLOC_00598 | -1.416597 | 4.1043764 | -5.062356 | 5.73E-06 | 0.0004089 | 3.8557667 |
| XLOC_00654 | -1.387539 | 5.156051  | -5.056717 | 5.84E-06 | 0.0004137 | 3.8372707 |
| TBL1Y      | 1.0082802 | 7.0887556 | 5.0511578 | 5.95E-06 | 0.0004179 | 3.8190407 |
| LOC1005061 | -1.155799 | 7.3235903 | -5.048712 | 6.00E-06 | 0.0004187 | 3.811023  |
| CBX3P2     | -1.264216 | 3.9988824 | -5.046909 | 6.04E-06 | 0.0004188 | 3.8051142 |
| CD68       | 1.0443667 | 7.1912836 | 5.0467734 | 6.05E-06 | 0.0004188 | 3.8046685 |
| RHOJ       | 1.0051562 | 7.9545081 | 5.0460351 | 6.06E-06 | 0.000419  | 3.8022485 |
| XLOC_00473 | 1.3510348 | 2.0816592 | 5.035545  | 6.29E-06 | 0.000429  | 3.7678783 |
| CAPS       | 1.0128787 | 6.9815493 | 5.0298583 | 6.41E-06 | 0.0004334 | 3.7492552 |
| CARD6      | 1.0969519 | 6.9525161 | 5.0279495 | 6.46E-06 | 0.000435  | 3.7430055 |
| PPEF1      | -2.30031  | 5.3405558 | -5.020528 | 6.62E-06 | 0.0004417 | 3.7187139 |
| TASP1      | -1.024831 | 6.2009094 | -5.019299 | 6.65E-06 | 0.0004427 | 3.714691  |
| SLC22A9    | -1.341049 | 5.6980846 | -5.018251 | 6.68E-06 | 0.0004434 | 3.711263  |
| EPHB4      | 1.086754  | 6.8955762 | 5.0151367 | 6.75E-06 | 0.0004448 | 3.7010743 |
| KCNF1      | -1.009617 | 7.9474919 | -5.007223 | 6.94E-06 | 0.0004514 | 3.6751917 |
| RXFP4      | 1.0463395 | 8.380767  | 4.9933034 | 7.28E-06 | 0.0004573 | 3.6296996 |
| HSD17B6    | -1.193762 | 8.2623901 | -4.988234 | 7.41E-06 | 0.0004583 | 3.6131418 |
| SLC7A4     | -1.430355 | 6.2810748 | -4.97306  | 7.81E-06 | 0.0004756 | 3.5636089 |
| GOLT1A     | -1.499623 | 3.6501683 | -4.960869 | 8.15E-06 | 0.0004881 | 3.5238499 |
| CHRM1      | -1.125442 | 12.47579  | -4.959667 | 8.19E-06 | 0.0004881 | 3.5199321 |
| XLOC_00777 | 1.1974159 | 5.4515417 | 4.9584011 | 8.22E-06 | 0.0004883 | 3.5158055 |
| XLOC_00296 | -1.060642 | 4.5794226 | -4.949362 | 8.48E-06 | 0.0004976 | 3.4863508 |
| LOC643783  | -1.034269 | 4.3122784 | -4.942171 | 8.70E-06 | 0.0005027 | 3.4629303 |
| CHRM4      | 1.7497907 | 9.0637407 | 4.9349076 | 8.92E-06 | 0.0005091 | 3.4392856 |
| SNAR-B2    | 1.0277424 | 12.053807 | 4.9304715 | 9.06E-06 | 0.0005151 | 3.4248499 |
| C7orf52    | -1.586984 | 3.7068371 | -4.906257 | 9.85E-06 | 0.0005445 | 3.3461275 |
| TNFRSF12A  | 1.2253037 | 7.3445276 | 4.9014831 | 1.00E-05 | 0.00055   | 3.3306241 |
| IL18R1     | 1.07743   | 4.7678261 | 4.8985384 | 1.01E-05 | 0.0005523 | 3.3210629 |
| XLOC_12_01 | -1.146174 | 11.308386 | -4.880657 | 1.08E-05 | 0.0005734 | 3.2630432 |
| SST        | -2.353122 | 5.9124708 | -4.871334 | 1.11E-05 | 0.0005835 | 3.2328224 |
| SIDT1      | -1.480124 | 7.1353035 | -4.865807 | 1.13E-05 | 0.0005908 | 3.2149144 |
| LOC646482  | -1.139449 | 4.580348  | -4.86502  | 1.14E-05 | 0.0005915 | 3.212365  |
| RGS7       | -1.213933 | 7.6352628 | -4.862391 | 1.15E-05 | 0.000594  | 3.2038507 |
| HAPLN1     | -1.154256 | 6.1144937 | -4.847489 | 1.21E-05 | 0.0006144 | 3.1556151 |
| LPAR1      | 1.0527562 | 9.6337187 | 4.8444038 | 1.22E-05 | 0.000617  | 3.1456335 |
| LOC100288C | -1.051894 | 9.2344728 | -4.841288 | 1.23E-05 | 0.0006208 | 3.1355554 |
| PNOC       | -1.401632 | 7.7326903 | -4.832659 | 1.27E-05 | 0.0006335 | 3.1076609 |
| LY6H       | -1.084091 | 9.3727028 | -4.829914 | 1.28E-05 | 0.000635  | 3.098791  |
| FCGR2A     | 1.0082021 | 7.4590807 | 4.8287128 | 1.29E-05 | 0.0006363 | 3.0949095 |

|            |           |           |           |          |           |           |
|------------|-----------|-----------|-----------|----------|-----------|-----------|
| CIQB       | 1.2359542 | 10.428044 | 4.8203699 | 1.32E-05 | 0.0006425 | 3.0679627 |
| PEX6       | 1.2132043 | 8.5078194 | 4.8195997 | 1.33E-05 | 0.0006425 | 3.0654756 |
| PRR22      | -1.102497 | 4.9692049 | -4.81932  | 1.33E-05 | 0.0006425 | 3.0645722 |
| PAPL       | -1.358552 | 11.262435 | -4.805297 | 1.40E-05 | 0.0006598 | 3.01932   |
| LOC1005055 | -1.240477 | 4.3456703 | -4.79847  | 1.43E-05 | 0.000667  | 2.9973039 |
| FBX016     | -1.305646 | 7.6476386 | -4.797491 | 1.43E-05 | 0.0006677 | 2.9941487 |
| GPLD1      | -1.026376 | 5.5894878 | -4.796492 | 1.44E-05 | 0.0006677 | 2.9909278 |
| PTPRR      | -1.168337 | 5.9640004 | -4.794676 | 1.45E-05 | 0.0006691 | 2.9850773 |
| RHBDF2     | 1.0556381 | 10.247029 | 4.7929676 | 1.46E-05 | 0.0006709 | 2.9795701 |
| GABRE      | 1.1277035 | 7.676862  | 4.7925284 | 1.46E-05 | 0.000671  | 2.9781545 |
| C6orf154   | -1.034485 | 9.151181  | -4.791711 | 1.46E-05 | 0.0006719 | 2.9755206 |
| CD37       | 1.0100462 | 5.1145642 | 4.7818004 | 1.51E-05 | 0.0006873 | 2.9435983 |
| TEKT3      | -1.048547 | 3.7510101 | -4.777371 | 1.54E-05 | 0.0006942 | 2.9293371 |
| XLOC_01396 | -1.289217 | 5.6159052 | -4.759129 | 1.64E-05 | 0.0007207 | 2.8706626 |
| CHRM3      | -1.019951 | 7.1484627 | -4.753952 | 1.66E-05 | 0.0007264 | 2.8540251 |
| XLOC_00972 | -1.036368 | 3.4331983 | -4.750711 | 1.68E-05 | 0.0007315 | 2.8436103 |
| MEIS3      | -1.041733 | 5.2499358 | -4.749502 | 1.69E-05 | 0.0007326 | 2.8397267 |
| GPC5       | -1.06792  | 8.3608121 | -4.746843 | 1.71E-05 | 0.0007344 | 2.8311867 |
| HSPA1A     | 1.3560351 | 12.637254 | 4.7380791 | 1.76E-05 | 0.0007506 | 2.8030528 |
| CACNG3     | -1.522139 | 7.6767435 | -4.733179 | 1.79E-05 | 0.0007573 | 2.7873312 |
| GAS7       | -1.478593 | 9.8776716 | -4.732596 | 1.79E-05 | 0.0007578 | 2.7854609 |
| XLOC_00777 | 1.2083339 | 6.1689526 | 4.7302143 | 1.81E-05 | 0.000761  | 2.7778201 |
| C20orf195  | 1.0891338 | 4.9457481 | 4.7251937 | 1.84E-05 | 0.0007691 | 2.7617206 |
| CHGB       | -1.073797 | 9.1468022 | -4.723349 | 1.85E-05 | 0.000772  | 2.7558069 |
| XLOC_00771 | -1.164966 | 4.5725469 | -4.716442 | 1.89E-05 | 0.0007843 | 2.7336699 |
| LRTM2      | -1.598697 | 6.7079675 | -4.713751 | 1.91E-05 | 0.00079   | 2.7250499 |
| ZIM2       | -1.028937 | 6.9837791 | -4.710141 | 1.93E-05 | 0.0007952 | 2.713488  |
| XLOC_00124 | 1.3935769 | 7.3320152 | 4.7068439 | 1.96E-05 | 0.0008022 | 2.7029317 |
| GRIA4      | -1.007685 | 9.3891128 | -4.697814 | 2.02E-05 | 0.0008241 | 2.6740319 |
| CRYM       | -2.033591 | 12.380994 | -4.692887 | 2.05E-05 | 0.0008328 | 2.6582716 |
| DLGAP2     | -1.627    | 7.5697401 | -4.691667 | 2.06E-05 | 0.0008339 | 2.6543706 |
| IL3RA      | 1.1579454 | 7.570428  | 4.6914057 | 2.06E-05 | 0.0008339 | 2.6535361 |
| DNAH2      | -1.163496 | 7.1465105 | -4.689664 | 2.07E-05 | 0.0008341 | 2.6479658 |
| C6orf118   | 1.4798797 | 6.2416693 | 4.6896264 | 2.07E-05 | 0.0008341 | 2.6478472 |
| C5orf55    | -1.097581 | 6.1047442 | -4.689482 | 2.08E-05 | 0.0008341 | 2.647385  |
| XLOC_00598 | 1.1675991 | 4.5408374 | 4.683664  | 2.12E-05 | 0.0008453 | 2.6287887 |
| SYCE1      | -1.072163 | 5.0640683 | -4.682795 | 2.12E-05 | 0.0008457 | 2.6260111 |
| HIGD1B     | 1.1699165 | 10.192456 | 4.6825191 | 2.13E-05 | 0.0008457 | 2.6251303 |
| XLOC_01054 | -1.111135 | 3.8662487 | -4.681174 | 2.13E-05 | 0.0008458 | 2.6208332 |
| SSR4P1     | -1.26158  | 5.0844053 | -4.679478 | 2.15E-05 | 0.0008471 | 2.6154126 |
| FIBIN      | -1.244463 | 6.091688  | -4.678622 | 2.15E-05 | 0.0008485 | 2.6126791 |
| LOC1005062 | -1.606697 | 6.2773769 | -4.677806 | 2.16E-05 | 0.0008488 | 2.6100723 |
| GEM        | 1.0495953 | 7.420879  | 4.6763438 | 2.17E-05 | 0.000852  | 2.6054029 |
| TNFRSF10B  | 1.0117514 | 7.8028206 | 4.674553  | 2.18E-05 | 0.0008552 | 2.599684  |
| ADHFE1     | -1.004849 | 7.6566449 | -4.662354 | 2.28E-05 | 0.000879  | 2.5607482 |
| XLOC_00294 | -1.104288 | 4.050031  | -4.656606 | 2.32E-05 | 0.0008907 | 2.5424136 |
| IL33       | -1.25208  | 7.7796991 | -4.645853 | 2.41E-05 | 0.0009102 | 2.5081422 |
| LOC1005062 | -1.550878 | 4.9557236 | -4.645135 | 2.41E-05 | 0.0009102 | 2.505854  |
| PMAIP1     | 1.0656737 | 6.3255491 | 4.6427213 | 2.43E-05 | 0.000915  | 2.4981662 |
| DGKI       | -1.147995 | 5.9692548 | -4.63968  | 2.46E-05 | 0.0009169 | 2.4884793 |
| CSDA       | 1.5063544 | 8.3570171 | 4.6315674 | 2.53E-05 | 0.0009373 | 2.4626563 |

|            |           |           |           |          |           |           |
|------------|-----------|-----------|-----------|----------|-----------|-----------|
| LOC1005067 | -1.223221 | 5.5502407 | -4.627878 | 2.56E-05 | 0.0009458 | 2.4509179 |
| LOC1001895 | -1.583693 | 5.1189342 | -4.62161  | 2.61E-05 | 0.0009595 | 2.4309834 |
| CHRN2      | -1.025239 | 10.651513 | -4.605121 | 2.77E-05 | 0.001001  | 2.3785912 |
| EVI2A      | 1.0263601 | 8.4577489 | 4.602109  | 2.79E-05 | 0.001009  | 2.3690304 |
| TNFRSF10D  | 1.5343025 | 7.3305494 | 4.5990185 | 2.82E-05 | 0.0010111 | 2.3592215 |
| GBP2       | 1.0346776 | 6.0390708 | 4.5970278 | 2.84E-05 | 0.0010111 | 2.3529045 |
| KCNB2      | -1.459657 | 6.9877954 | -4.596561 | 2.85E-05 | 0.0010111 | 2.3514246 |
| CCR1       | 1.064346  | 7.4176151 | 4.5924187 | 2.89E-05 | 0.0010197 | 2.3382829 |
| S100A4     | 1.1241362 | 7.0563341 | 4.5902051 | 2.91E-05 | 0.0010251 | 2.3312628 |
| CXCR4      | 1.0175931 | 9.1245183 | 4.5832768 | 2.98E-05 | 0.0010357 | 2.3092986 |
| IFI30      | 1.0174609 | 8.656211  | 4.5821244 | 2.99E-05 | 0.0010357 | 2.3056466 |
| ROBO2      | -1.021522 | 5.24659   | -4.580981 | 3.00E-05 | 0.0010361 | 2.3020228 |
| ST7-AS1    | -1.24171  | 6.0521662 | -4.576102 | 3.05E-05 | 0.0010422 | 2.2865679 |
| TLR2       | 1.1849882 | 7.6506285 | 4.568722  | 3.13E-05 | 0.0010539 | 2.2631998 |
| RFPL1-AS1  | -1.204467 | 9.9050573 | -4.567584 | 3.14E-05 | 0.0010543 | 2.259599  |
| HOXC11     | 1.2669336 | 2.441525  | 4.5637783 | 3.18E-05 | 0.0010583 | 2.2475551 |
| NKX6-2     | 1.040396  | 10.731895 | 4.5619917 | 3.20E-05 | 0.0010633 | 2.2419028 |
| C20orf141  | 1.2883409 | 12.642772 | 4.5614509 | 3.21E-05 | 0.0010633 | 2.2401922 |
| PTPN3      | -1.599868 | 5.9687698 | -4.540831 | 3.44E-05 | 0.0011192 | 2.1750248 |
| CDNF       | -1.110722 | 3.8954918 | -4.537902 | 3.47E-05 | 0.0011261 | 2.1657762 |
| SVOP       | -1.47895  | 10.71006  | -4.537814 | 3.47E-05 | 0.0011261 | 2.1655002 |
| LOC145694  | -1.066745 | 4.5218854 | -4.536009 | 3.49E-05 | 0.0011307 | 2.1598005 |
| LOC1001309 | -1.024537 | 5.9124526 | -4.534206 | 3.51E-05 | 0.0011353 | 2.1541104 |
| CNTNAP2    | -1.206641 | 9.449914  | -4.528873 | 3.58E-05 | 0.0011524 | 2.1372857 |
| SLC16A3    | 1.0058102 | 9.6058975 | 4.5174122 | 3.72E-05 | 0.0011875 | 2.1011551 |
| WDR54      | -1.168848 | 7.8691288 | -4.517016 | 3.72E-05 | 0.0011875 | 2.0999064 |
| LOC1005099 | -1.472527 | 8.6102834 | -4.515493 | 3.74E-05 | 0.0011924 | 2.095107  |
| LOC401442  | -1.649905 | 5.7546473 | -4.506901 | 3.85E-05 | 0.0012154 | 2.0680506 |
| XLOC_00692 | -1.003597 | 4.2817537 | -4.503683 | 3.90E-05 | 0.0012226 | 2.0579208 |
| ARPP21     | -1.325241 | 9.2078014 | -4.499404 | 3.95E-05 | 0.0012277 | 2.0444567 |
| FLT1       | 1.0882356 | 7.8500719 | 4.494242  | 4.02E-05 | 0.0012353 | 2.0282219 |
| LOC375295  | -1.248141 | 5.209665  | -4.48705  | 4.12E-05 | 0.0012549 | 2.0056137 |
| SLC22A6    | -1.271153 | 3.7231616 | -4.481352 | 4.20E-05 | 0.0012752 | 1.9877149 |
| LY86-AS1   | -1.489552 | 6.3731883 | -4.479332 | 4.23E-05 | 0.0012795 | 1.9813696 |
| CCL2       | 1.5474757 | 7.9321988 | 4.479009  | 4.23E-05 | 0.0012795 | 1.9803565 |
| LOC1001315 | 1.0855847 | 5.9374903 | 4.4785065 | 4.24E-05 | 0.0012795 | 1.9787787 |
| CPB1       | -1.012962 | 3.4467958 | -4.478376 | 4.24E-05 | 0.0012795 | 1.9783675 |
| CCDC113    | -1.059957 | 6.3844819 | -4.476175 | 4.27E-05 | 0.0012857 | 1.9714575 |
| RANBP17    | -1.201979 | 5.4450104 | -4.475868 | 4.28E-05 | 0.0012859 | 1.9704962 |
| XLOC_12_OC | -1.367045 | 4.6361727 | -4.474631 | 4.30E-05 | 0.00129   | 1.9666124 |
| XLOC_00169 | -1.011126 | 5.3013361 | -4.464368 | 4.45E-05 | 0.0013253 | 1.9344134 |
| PKP3       | -1.275524 | 5.7265655 | -4.463132 | 4.46E-05 | 0.0013296 | 1.9305382 |
| XLOC_12_OC | -1.395247 | 11.248048 | -4.462171 | 4.48E-05 | 0.0013303 | 1.9275251 |
| LOC646241  | -1.373418 | 4.488135  | -4.455485 | 4.58E-05 | 0.0013479 | 1.9065727 |
| FAM19A1    | -1.063669 | 6.9558433 | -4.454525 | 4.60E-05 | 0.0013498 | 1.9035632 |
| LOC644450  | 1.1568945 | 8.8897912 | 4.4505385 | 4.66E-05 | 0.0013641 | 1.8910765 |
| XLOC_0084C | -1.318325 | 6.2445565 | -4.448405 | 4.69E-05 | 0.0013695 | 1.8843966 |
| HTR2A      | -1.23825  | 8.9212687 | -4.44799  | 4.70E-05 | 0.0013696 | 1.8830963 |
| KDM4D      | -1.287966 | 4.3326252 | -4.445938 | 4.73E-05 | 0.0013728 | 1.8766734 |
| TAAR5      | -1.361727 | 10.337159 | -4.443437 | 4.77E-05 | 0.00138   | 1.868845  |
| ANXA8L2    | -1.237618 | 5.8957727 | -4.442897 | 4.78E-05 | 0.0013802 | 1.8671542 |

|            |           |           |           |           |           |           |
|------------|-----------|-----------|-----------|-----------|-----------|-----------|
| MAEL       | -1.07199  | 4.8800354 | -4.425414 | 5.07E-05  | 0.0014456 | 1.8124876 |
| XLOC_00004 | -1.023872 | 4.5894105 | -4.423148 | 5.10E-05  | 0.0014514 | 1.8054072 |
| SNAR-H     | 1.0181466 | 11.272567 | 4.4107286 | 5.32E-05  | 0.0014902 | 1.7666378 |
| WIF1       | -1.246326 | 10.342177 | -4.410075 | 5.33E-05  | 0.0014911 | 1.7646    |
| SYT16      | -1.400463 | 5.1736961 | -4.407544 | 5.38E-05  | 0.0015025 | 1.756704  |
| XLOC_01097 | -1.259913 | 3.4568859 | -4.405068 | 5.42E-05  | 0.001511  | 1.7489822 |
| ATL1       | -1.162163 | 9.8379158 | -4.397447 | 5.56E-05  | 0.0015357 | 1.7252268 |
| PRMT8      | -1.693717 | 5.8499886 | -4.386934 | 5.76E-05  | 0.001572  | 1.6924889 |
| XLOC_00595 | 1.2778197 | 3.8959275 | 4.3867555 | 5.76E-05  | 0.001572  | 1.6919316 |
| WEE2       | -1.016602 | 2.8485196 | -4.383467 | 5.83E-05  | 0.0015826 | 1.6816985 |
| ZNF214     | -1.160931 | 4.4571774 | -4.373582 | 6.02E-05  | 0.0016205 | 1.6509551 |
| SFTPD      | -1.281393 | 5.2655641 | -4.371976 | 6.05E-05  | 0.0016279 | 1.6459618 |
| XLOC_00436 | 1.0688886 | 4.6974293 | 4.3706833 | 6.08E-05  | 0.0016314 | 1.6419449 |
| PDLIM4     | 1.1521512 | 6.2335278 | 4.37032   | 6.09E-05  | 0.0016314 | 1.6408159 |
| PLD3       | -1.025399 | 9.4695585 | -4.368059 | 6.13E-05  | 0.0016369 | 1.6337898 |
| PPM1J      | -1.151596 | 6.4332242 | -4.36743  | 6.15E-05  | 0.001639  | 1.631836  |
| DIO3OS     | 1.0144785 | 5.8779747 | 4.353025  | 6.45E-05  | 0.0017095 | 1.5871166 |
| REP15      | 2.0985467 | 8.3778885 | 4.3516441 | 6.48E-05  | 0.0017131 | 1.582833  |
| 11-Mar     | -1.553091 | 4.918436  | -4.350486 | 6.50E-05  | 0.0017183 | 1.5792403 |
| ARHGAP36   | -1.135946 | 5.5493866 | -4.350064 | 6.51E-05  | 0.0017193 | 1.5779307 |
| SLC26A4    | -1.307917 | 5.9647976 | -4.346794 | 6.58E-05  | 0.0017317 | 1.5677915 |
| ZWILCH     | -1.289818 | 4.7302321 | -4.336664 | 6.81E-05  | 0.0017737 | 1.5364038 |
| AEBP1      | 1.0909876 | 8.9137765 | 4.3329072 | 6.89E-05  | 0.0017737 | 1.5247699 |
| AP3B2      | -1.053992 | 8.3224689 | -4.332614 | 6.90E-05  | 0.0017737 | 1.5238616 |
| SNAR-G2    | 1.0256598 | 11.559519 | 4.3140587 | 7.34E-05  | 0.0018493 | 1.4664725 |
| PXDNL      | -1.000739 | 3.8516361 | -4.314041 | 7.34E-05  | 0.0018493 | 1.4664177 |
| GNG2       | -1.396615 | 8.5915469 | -4.312525 | 7.38E-05  | 0.0018528 | 1.4617344 |
| SRGN       | 1.0624267 | 9.4642116 | 4.3047239 | 7.57E-05  | 0.001885  | 1.4376423 |
| XLOC_12_OC | -1.088948 | 4.0546311 | -4.297611 | 7.75E-05  | 0.0019062 | 1.415694  |
| LOC286002  | -1.64993  | 6.0168446 | -4.293131 | 7.87E-05  | 0.0019215 | 1.4018769 |
| LOC1005064 | -1.23913  | 5.3063969 | -4.287455 | 8.01E-05  | 0.0019445 | 1.3843806 |
| SNAR-F     | 1.1351689 | 10.872815 | 4.2784614 | 8.26E-05  | 0.0019811 | 1.356681  |
| GP9        | 1.059976  | 6.821875  | 4.2770002 | 8.30E-05  | 0.0019872 | 1.352183  |
| PCDH11Y    | -1.071675 | 5.0509632 | -4.273185 | 8.40E-05  | 0.0019981 | 1.3404434 |
| CAMK1G     | -1.194197 | 9.3482735 | -4.268663 | 8.53E-05  | 0.0020172 | 1.3265322 |
| ANKRD55    | -1.046222 | 4.6511733 | -4.257306 | 8.85E-05  | 0.0020682 | 1.2916273 |
| PRPH2      | -1.235051 | 5.7716016 | -4.256411 | 8.88E-05  | 0.0020728 | 1.2888761 |
| XLOC_00248 | -1.480613 | 10.03366  | -4.253842 | 8.95E-05  | 0.0020857 | 1.2809893 |
| COPG2IT1   | -1.041503 | 13.085368 | -4.249021 | 9.10E-05  | 0.0021059 | 1.2661882 |
| DUS2L      | -1.007904 | 4.473665  | -4.247233 | 9.15E-05  | 0.0021103 | 1.2607034 |
| NRSN1      | -1.146417 | 5.9535885 | -4.243851 | 9.25E-05  | 0.0021263 | 1.2503273 |
| GJB6       | -1.204352 | 8.9265391 | -4.239658 | 9.38E-05  | 0.0021485 | 1.2374683 |
| ADAMTS1    | 1.2223721 | 7.1615879 | 4.2299539 | 9.69E-05  | 0.0022022 | 1.2077347 |
| CBLN4      | -1.648464 | 9.1090973 | -4.221009 | 9.98E-05  | 0.0022519 | 1.1803544 |
| UNC13A     | -1.419044 | 7.2554889 | -4.214605 | 0.0001019 | 0.0022712 | 1.1607676 |
| NGEF       | -1.012587 | 12.215841 | -4.213152 | 0.0001024 | 0.0022766 | 1.1563246 |
| BCAS1      | 1.0873049 | 10.845374 | 4.2104077 | 0.0001033 | 0.0022905 | 1.1479368 |
| C3orf71    | -1.099976 | 4.7027931 | -4.208601 | 0.0001039 | 0.002297  | 1.1424162 |
| BDNF       | -1.328633 | 4.4582594 | -4.205813 | 0.0001049 | 0.0023086 | 1.1338996 |
| MOXD1      | -1.007341 | 9.4656007 | -4.204621 | 0.0001053 | 0.0023146 | 1.1302573 |
| NPTXR      | -1.18056  | 7.6112501 | -4.202459 | 0.000106  | 0.0023246 | 1.1236566 |

|            |           |           |           |           |           |           |
|------------|-----------|-----------|-----------|-----------|-----------|-----------|
| CCKBR      | -1.33096  | 7.3190504 | -4.19838  | 0.0001075 | 0.0023415 | 1.1112051 |
| CYP4X1     | -1.147327 | 7.779546  | -4.182192 | 0.0001133 | 0.0024326 | 1.0618439 |
| INSM1      | -1.249613 | 4.8963683 | -4.181419 | 0.0001136 | 0.0024346 | 1.059487  |
| FOXJ1      | 1.2229872 | 6.060976  | 4.1734741 | 0.0001166 | 0.0024781 | 1.0352975 |
| MIR7-3HG   | -1.108402 | 7.0091539 | -4.168266 | 0.0001186 | 0.0025041 | 1.0194519 |
| GDA        | -1.534396 | 8.5706751 | -4.166259 | 0.0001194 | 0.0025123 | 1.0133486 |
| TOX        | -1.118211 | 6.6148598 | -4.164948 | 0.0001199 | 0.0025198 | 1.0093616 |
| XLOC_00008 | -1.140415 | 3.2208719 | -4.159809 | 0.0001219 | 0.0025408 | 0.9937399 |
| SNORA73A   | 1.2664819 | 7.878167  | 4.15598   | 0.0001234 | 0.0025661 | 0.9821075 |
| DOC2A      | -1.273306 | 7.1703346 | -4.155669 | 0.0001236 | 0.002567  | 0.9811636 |
| GNG3       | -1.299234 | 9.3795078 | -4.154689 | 0.000124  | 0.0025736 | 0.9781851 |
| ODZ3       | -1.120791 | 4.6111594 | -4.138748 | 0.0001306 | 0.002678  | 0.929819  |
| LYVE1      | 1.1678168 | 6.3031901 | 4.1366635 | 0.0001315 | 0.0026866 | 0.9234994 |
| PRRT1      | -1.190911 | 10.539929 | -4.129074 | 0.0001348 | 0.0027333 | 0.9005084 |
| C15orf27   | -1.022368 | 7.4536027 | -4.11725  | 0.0001401 | 0.0028128 | 0.8647281 |
| RPL13AP17  | -1.109883 | 12.309509 | -4.115416 | 0.0001409 | 0.0028244 | 0.8591832 |
| Q958C4     | -1.132795 | 5.0273776 | -4.114811 | 0.0001412 | 0.002825  | 0.8573537 |
| FLJ25917   | -1.310785 | 4.528529  | -4.113714 | 0.0001417 | 0.0028294 | 0.8540376 |
| XLOC_00554 | -1.010372 | 2.9225928 | -4.109563 | 0.0001436 | 0.0028607 | 0.8414963 |
| XLOC_12_OC | -1.3146   | 5.0712054 | -4.108817 | 0.0001439 | 0.0028623 | 0.8392416 |
| C21orf62   | 1.0767348 | 4.5664853 | 4.1057764 | 0.0001454 | 0.0028796 | 0.8300579 |
| SLC30A3    | -1.28808  | 10.8309   | -4.101113 | 0.0001476 | 0.002903  | 0.8159786 |
| LOC1001299 | -1.200316 | 5.03374   | -4.099873 | 0.0001482 | 0.002903  | 0.8122364 |
| VENTXP1    | 1.099304  | 2.1410997 | 4.0986157 | 0.0001488 | 0.0029053 | 0.808443  |
| CLSTN3     | -1.094688 | 9.771355  | -4.098182 | 0.000149  | 0.0029053 | 0.8071359 |
| FBXW9      | -1.065991 | 5.202116  | -4.097741 | 0.0001492 | 0.0029077 | 0.8058027 |
| PGM2L1     | -1.078475 | 11.27233  | -4.094296 | 0.0001509 | 0.0029333 | 0.7954122 |
| SCARNA11   | 1.4230919 | 5.1988451 | 4.0906564 | 0.0001527 | 0.0029627 | 0.7844391 |
| HSPA1B     | 1.2375829 | 10.654879 | 4.0879484 | 0.000154  | 0.0029758 | 0.7762773 |
| C6orf222   | -1.219334 | 3.657152  | -4.086218 | 0.0001549 | 0.0029759 | 0.7710626 |
| FLJ32063   | -1.851224 | 6.3665123 | -4.084042 | 0.000156  | 0.0029817 | 0.7645089 |
| SLC10A4    | -1.445437 | 5.7036822 | -4.084016 | 0.000156  | 0.0029817 | 0.7644316 |
| XLOC_00575 | -1.117403 | 7.1965131 | -4.081713 | 0.0001572 | 0.0029862 | 0.7574933 |
| BTN3A1     | 1.1312821 | 6.7223616 | 4.0793065 | 0.0001584 | 0.0030011 | 0.750249  |
| XLOC_01003 | 1.0493861 | 5.636555  | 4.078113  | 0.000159  | 0.0030054 | 0.7466565 |
| CHAF1B     | -1.03323  | 7.3207152 | -4.077874 | 0.0001591 | 0.0030054 | 0.7459379 |
| NECAB1     | -1.676052 | 8.6060794 | -4.070931 | 0.0001628 | 0.0030512 | 0.72505   |
| ENC1       | -1.38147  | 9.0940908 | -4.06942  | 0.0001636 | 0.0030644 | 0.7205049 |
| SYN2       | -1.054822 | 11.431257 | -4.065316 | 0.0001657 | 0.0030945 | 0.7081676 |
| SRGAP3     | -1.081148 | 7.7907971 | -4.051922 | 0.0001731 | 0.0031961 | 0.6679496 |
| IL1RL1     | 1.9376313 | 4.1044515 | 4.0493974 | 0.0001745 | 0.0032119 | 0.6603754 |
| LOC1006528 | -1.006917 | 6.4792309 | -4.049278 | 0.0001746 | 0.0032119 | 0.6600177 |
| BEX1       | -1.289502 | 13.712982 | -4.045598 | 0.0001767 | 0.0032341 | 0.6489813 |
| BEX2       | -1.144769 | 13.523598 | -4.041307 | 0.0001791 | 0.0032662 | 0.6361218 |
| XLOC_00451 | 1.0034454 | 7.7518122 | 4.0311854 | 0.0001851 | 0.0033423 | 0.6058106 |
| XLOC_12_OC | -1.208102 | 6.2091471 | -4.028729 | 0.0001865 | 0.0033613 | 0.59846   |
| XLOC_12_OC | -1.041086 | 5.5428055 | -4.019915 | 0.0001919 | 0.0034178 | 0.5721046 |
| OLFM4      | -1.351778 | 5.6662893 | -4.016953 | 0.0001937 | 0.003441  | 0.563255  |
| EGFL6      | -1.459384 | 4.9038208 | -4.013908 | 0.0001957 | 0.0034615 | 0.5541592 |
| HCG4       | -1.133854 | 4.6384994 | -4.010368 | 0.0001979 | 0.0034876 | 0.5435909 |
| XLOC_00506 | -1.782777 | 5.3779492 | -4.009091 | 0.0001987 | 0.0034905 | 0.5397794 |



|            |           |           |           |           |           |           |
|------------|-----------|-----------|-----------|-----------|-----------|-----------|
| PPP1R14C   | -1.339242 | 5.5967199 | -4.008667 | 0.000199  | 0.0034933 | 0.5385122 |
| SLC01C1    | -1.169349 | 7.8321475 | -4.006458 | 0.0002004 | 0.0035016 | 0.5319207 |
| XLOC_01148 | -1.145155 | 8.3005643 | -4.005547 | 0.000201  | 0.0035074 | 0.5292029 |
| TMEM233    | -1.053632 | 6.0684685 | -4.005136 | 0.0002013 | 0.0035102 | 0.5279777 |
| XLOC_00121 | 1.0209626 | 5.2259964 | 4.0036125 | 0.0002022 | 0.003517  | 0.5234332 |
| CACNG1     | -1.110142 | 4.049691  | -4.001806 | 0.0002034 | 0.0035292 | 0.5180475 |
| AKAP5      | -1.126968 | 6.1077976 | -3.99957  | 0.0002049 | 0.0035434 | 0.5113795 |
| LOC100129C | 1.2921974 | 5.337675  | 3.9971763 | 0.0002065 | 0.0035609 | 0.5042453 |
| XLOC_0077C | -1.027563 | 4.1604348 | -3.98743  | 0.000213  | 0.0036261 | 0.4752187 |
| PNMA6C     | -1.034372 | 9.0185047 | -3.987326 | 0.0002131 | 0.0036261 | 0.4749081 |
| XLOC_0088C | 1.2354037 | 2.2473782 | 3.9855865 | 0.0002143 | 0.0036387 | 0.4697326 |
| XLOC_00452 | -1.150646 | 3.252185  | -3.982391 | 0.0002165 | 0.0036684 | 0.4602266 |
| MS4A6A     | 1.1594726 | 5.593661  | 3.9756044 | 0.0002213 | 0.0037118 | 0.4400477 |
| NAP1L5     | -1.13534  | 10.480816 | -3.967831 | 0.0002268 | 0.0037758 | 0.4169571 |
| SPINK8     | 1.0043619 | 6.9960186 | 3.9660567 | 0.0002281 | 0.003789  | 0.4116903 |
| ANGPT2     | 1.6553484 | 8.5219295 | 3.9638133 | 0.0002298 | 0.0038109 | 0.4050323 |
| DACH2      | -1.548307 | 7.507959  | -3.962829 | 0.0002305 | 0.0038189 | 0.4021128 |
| RGS17      | -1.170378 | 5.2090383 | -3.962206 | 0.000231  | 0.0038206 | 0.4002622 |
| TRIM36     | -1.200003 | 7.4230055 | -3.955026 | 0.0002363 | 0.0038933 | 0.3789716 |
| BEX5       | -1.390789 | 10.820205 | -3.954745 | 0.0002365 | 0.0038948 | 0.378139  |
| SLC17A6    | -1.281111 | 9.020945  | -3.95333  | 0.0002376 | 0.0039008 | 0.3739461 |
| MYT1L      | -1.644724 | 7.7358489 | -3.95138  | 0.0002391 | 0.0039109 | 0.3681667 |
| LOC389023  | -1.048727 | 8.8168513 | -3.941426 | 0.0002468 | 0.0040167 | 0.3386972 |
| GPRIN2     | -1.132778 | 3.6194936 | -3.939066 | 0.0002487 | 0.0040328 | 0.3317147 |
| GATA2      | 1.090842  | 5.2166701 | 3.9344814 | 0.0002524 | 0.0040544 | 0.3181587 |
| PCP4L1     | -1.492325 | 8.4424586 | -3.932827 | 0.0002537 | 0.0040613 | 0.3132687 |
| PDE1A      | -1.042384 | 6.5160656 | -3.932662 | 0.0002538 | 0.0040613 | 0.3127799 |
| GRP        | -1.156973 | 5.4651268 | -3.916128 | 0.0002676 | 0.0042214 | 0.2639696 |
| ADCYAP1    | -1.080041 | 5.8470823 | -3.910254 | 0.0002726 | 0.00428   | 0.2466537 |
| UBE2N      | -1.00469  | 7.7055726 | -3.909122 | 0.0002736 | 0.0042912 | 0.2433177 |
| XLOC_00837 | -1.06217  | 2.4164852 | -3.908627 | 0.000274  | 0.0042938 | 0.2418621 |
| LOC440896  | -1.134954 | 8.1110005 | -3.907174 | 0.0002753 | 0.0043074 | 0.2375813 |
| XLOC_00376 | 1.2906304 | 2.6226632 | 3.9050286 | 0.0002772 | 0.0043288 | 0.2312625 |
| SNORD1B    | 1.2832162 | 4.7641394 | 3.8959551 | 0.0002853 | 0.0044227 | 0.2045612 |
| OR13J1     | 1.106288  | 2.6640149 | 3.895574  | 0.0002856 | 0.004426  | 0.2034404 |
| ENPP5      | -1.341753 | 7.4923279 | -3.893288 | 0.0002877 | 0.0044527 | 0.1967176 |
| SPINK2     | -1.041452 | 4.3611225 | -3.891236 | 0.0002896 | 0.0044636 | 0.1906863 |
| FLJ45832   | -1.017075 | 5.0618079 | -3.885283 | 0.0002951 | 0.0045292 | 0.1731964 |
| SNORA14B   | 1.2826537 | 7.0396472 | 3.8835037 | 0.0002968 | 0.0045483 | 0.1679726 |
| NFE2       | 1.0607928 | 5.478741  | 3.8799776 | 0.0003001 | 0.0045885 | 0.1576222 |
| LOC100132C | 1.3327184 | 6.2061054 | 3.8779502 | 0.0003021 | 0.0046049 | 0.1516733 |
| CREG2      | -1.323773 | 10.419044 | -3.876226 | 0.0003037 | 0.0046189 | 0.1466163 |
| FRMPD4     | -1.072322 | 8.4349551 | -3.87424  | 0.0003056 | 0.0046308 | 0.1407901 |
| PHYHIP     | -1.082917 | 10.467747 | -3.872417 | 0.0003074 | 0.0046488 | 0.1354455 |
| XLOC_00467 | 1.131663  | 4.1789455 | 3.871276  | 0.0003085 | 0.0046568 | 0.132101  |
| CNR1       | -1.604121 | 8.7785812 | -3.868241 | 0.0003115 | 0.0046908 | 0.1232058 |
| SYT5       | -1.112922 | 5.4189856 | -3.864214 | 0.0003155 | 0.0047266 | 0.1114106 |
| LOC441052  | -1.354241 | 5.213716  | -3.855484 | 0.0003243 | 0.0048143 | 0.085863  |
| LOC285181  | 1.0212388 | 3.9790424 | 3.8544993 | 0.0003253 | 0.0048255 | 0.082982  |
| LOC401022  | 1.1937769 | 4.765254  | 3.8470988 | 0.000333  | 0.0048985 | 0.0613511 |
| OLFM3      | -1.485157 | 6.8926658 | -3.839033 | 0.0003416 | 0.0049831 | 0.0378    |

|            |           |           |           |           |           |           |
|------------|-----------|-----------|-----------|-----------|-----------|-----------|
| ADCY2      | -1.200931 | 5.7359806 | -3.837104 | 0.0003437 | 0.0050044 | 0.0321717 |
| GAP43      | -1.201734 | 10.681986 | -3.833857 | 0.0003473 | 0.0050319 | 0.0227008 |
| SYP        | -1.538019 | 8.3668374 | -3.83347  | 0.0003477 | 0.0050324 | 0.021572  |
| LOC1001312 | -1.057622 | 5.1495252 | -3.831996 | 0.0003493 | 0.0050512 | 0.0172759 |
| FAM75A2    | -1.052187 | 3.654676  | -3.825679 | 0.0003563 | 0.0051154 | -0.001132 |
| GAD1       | -1.339002 | 7.9566268 | -3.82539  | 0.0003566 | 0.0051159 | -0.001973 |
| CLEC2B     | 1.0361407 | 6.1877553 | 3.825252  | 0.0003568 | 0.0051159 | -0.002367 |
| KCNE4      | 1.320147  | 8.1962143 | 3.8224953 | 0.0003599 | 0.0051468 | -0.010404 |
| GPRASP2    | -1.239545 | 9.7543488 | -3.822151 | 0.0003603 | 0.0051478 | -0.011405 |
| PCDH8      | -1.632685 | 9.2169627 | -3.820072 | 0.0003627 | 0.0051678 | -0.017458 |
| KCNV1      | -1.353304 | 8.5189834 | -3.819705 | 0.0003631 | 0.0051715 | -0.018526 |
| ENTPD3     | -1.669868 | 7.4982779 | -3.818428 | 0.0003646 | 0.0051758 | -0.022242 |
| C1QA       | 1.0352036 | 8.0630239 | 3.813805  | 0.0003699 | 0.0052197 | -0.035689 |
| SNORD30    | 1.1267815 | 5.5390369 | 3.8066025 | 0.0003784 | 0.0052997 | -0.056622 |
| LOC1005075 | 1.0503605 | 2.3759506 | 3.8052024 | 0.00038   | 0.0053163 | -0.060689 |
| MAGEL2     | -1.245051 | 7.6550331 | -3.80506  | 0.0003802 | 0.0053163 | -0.061103 |
| C2orf80    | -1.003943 | 9.7277903 | -3.803341 | 0.0003823 | 0.0053403 | -0.066095 |
| XLOC_00914 | 1.148383  | 2.2609819 | 3.7974669 | 0.0003894 | 0.0054056 | -0.083143 |
| FSTL5      | -1.191816 | 7.0806493 | -3.791796 | 0.0003964 | 0.0054684 | -0.099589 |
| SLC5A11    | 1.0659733 | 8.7497779 | 3.7895554 | 0.0003992 | 0.0054952 | -0.106082 |
| XLOC_00149 | 1.1801924 | 2.2256051 | 3.7874109 | 0.0004019 | 0.005518  | -0.112295 |
| MAL2       | -1.684218 | 8.6759813 | -3.785847 | 0.0004039 | 0.005541  | -0.116827 |
| NRXN3      | -1.000538 | 6.9620529 | -3.784546 | 0.0004055 | 0.0055573 | -0.120592 |
| CITED1     | -1.180635 | 4.9394517 | -3.778882 | 0.0004128 | 0.0056208 | -0.136987 |
| NME5       | -1.138871 | 7.2546728 | -3.777837 | 0.0004141 | 0.005629  | -0.140011 |
| XLOC_00986 | -1.007052 | 5.8031128 | -3.776522 | 0.0004158 | 0.0056396 | -0.143814 |
| XLOC_01256 | 1.0795492 | 2.7477746 | 3.7699009 | 0.0004245 | 0.0057251 | -0.162956 |
| RAB27B     | -1.363488 | 6.665974  | -3.767082 | 0.0004283 | 0.0057408 | -0.171101 |
| SLC4A10    | -1.087016 | 7.9375634 | -3.762468 | 0.0004345 | 0.0057904 | -0.184424 |
| LOC729506  | 1.1497056 | 6.0643381 | 3.7572052 | 0.0004417 | 0.0058508 | -0.199608 |
| SV2B       | -1.144365 | 11.827483 | -3.757157 | 0.0004418 | 0.0058508 | -0.199747 |
| LOC613126  | -1.055322 | 3.7323028 | -3.756667 | 0.0004425 | 0.0058574 | -0.20116  |
| RBM11      | -1.003334 | 6.6684008 | -3.747929 | 0.0004547 | 0.0059775 | -0.226345 |
| XLOC_00519 | 1.131182  | 3.6532911 | 3.7435414 | 0.000461  | 0.006035  | -0.238978 |
| TUBB3      | -1.00946  | 12.283959 | -3.74227  | 0.0004628 | 0.0060456 | -0.242638 |
| SYNPR      | -1.433329 | 11.073711 | -3.738287 | 0.0004686 | 0.0061    | -0.254096 |
| ANO3       | -1.011676 | 9.3284863 | -3.735514 | 0.0004727 | 0.0061405 | -0.262071 |
| TNFSF14    | 1.1559733 | 2.741175  | 3.7327131 | 0.0004768 | 0.0061743 | -0.270122 |
| XLOC_00493 | 1.0304884 | 4.8364917 | 3.7311426 | 0.0004792 | 0.0061921 | -0.274635 |
| XLOC_00153 | 1.2208631 | 2.5175249 | 3.7251879 | 0.0004881 | 0.0062775 | -0.291736 |
| PNMA6A     | -1.278217 | 4.755868  | -3.723297 | 0.000491  | 0.0062989 | -0.297163 |
| HLA-DRB5   | 1.1702681 | 8.5869626 | 3.7178361 | 0.0004994 | 0.0063616 | -0.312829 |
| SOCS3      | 1.7095045 | 6.7620494 | 3.714537  | 0.0005046 | 0.0064122 | -0.322287 |
| XLOC_00619 | 1.0507995 | 2.1307882 | 3.7034559 | 0.0005222 | 0.006574  | -0.354019 |
| XLOC_00148 | 1.3913278 | 7.2070681 | 3.6921971 | 0.0005408 | 0.0067154 | -0.386206 |
| XLOC_01347 | 1.1452927 | 6.2687533 | 3.6915406 | 0.0005419 | 0.0067238 | -0.388081 |
| LOC1005067 | -1.012863 | 2.8075284 | -3.6831   | 0.0005562 | 0.0068385 | -0.412174 |
| HSPB3      | -1.461958 | 8.0123957 | -3.679441 | 0.0005626 | 0.006903  | -0.422606 |
| LOC1001291 | -1.221545 | 10.308264 | -3.675084 | 0.0005702 | 0.0069762 | -0.435022 |
| XK         | -1.128436 | 9.2055332 | -3.672563 | 0.0005747 | 0.0070167 | -0.442203 |
| FLJ40453   | 1.218151  | 2.3690295 | 3.6696398 | 0.0005799 | 0.0070575 | -0.450527 |

|            |           |           |           |           |           |           |
|------------|-----------|-----------|-----------|-----------|-----------|-----------|
| XLOC_00249 | 1.306044  | 6.5130439 | 3.6676551 | 0.0005835 | 0.0070755 | -0.456175 |
| HPRT1      | -1.189121 | 10.919953 | -3.664589 | 0.000589  | 0.0071138 | -0.464899 |
| HS6ST2     | -1.090692 | 6.5410663 | -3.661431 | 0.0005948 | 0.0071638 | -0.473878 |
| DLX5       | -1.261868 | 6.4397755 | -3.645886 | 0.000624  | 0.0073784 | -0.518017 |
| GAD2       | -1.232887 | 6.2063962 | -3.645352 | 0.000625  | 0.0073836 | -0.519533 |
| HTR3B      | -1.011301 | 4.1231809 | -3.645249 | 0.0006252 | 0.0073836 | -0.519823 |
| XLOC_00114 | -1.148839 | 9.8499378 | -3.642979 | 0.0006296 | 0.0074082 | -0.52626  |
| XLOC_0039C | 1.0747675 | 2.280043  | 3.6367103 | 0.0006419 | 0.007514  | -0.544021 |
| CD200      | -1.398947 | 7.755498  | -3.62953  | 0.0006562 | 0.0076266 | -0.564343 |
| CADPS      | -1.048893 | 7.7563345 | -3.626001 | 0.0006634 | 0.0076787 | -0.574323 |
| CEP41      | -1.391904 | 7.6924439 | -3.625877 | 0.0006636 | 0.0076788 | -0.574674 |
| DOCK3      | -1.28533  | 9.9057956 | -3.622426 | 0.0006707 | 0.00773   | -0.584426 |
| KIT        | -1.013959 | 7.3973738 | -3.62099  | 0.0006737 | 0.0077502 | -0.588484 |
| TMEM200A   | -1.052025 | 6.229696  | -3.610134 | 0.0006965 | 0.0079472 | -0.619124 |
| VSNL1      | -1.540503 | 13.616134 | -3.60382  | 0.0007101 | 0.0080576 | -0.63692  |
| C1orf173   | -1.573314 | 8.3850616 | -3.601919 | 0.0007142 | 0.0080865 | -0.642275 |
| XLOC_01167 | 1.3921919 | 5.7012412 | 3.5956223 | 0.0007281 | 0.0081917 | -0.66     |
| ZNF620     | 1.5049918 | 7.0098663 | 3.5946164 | 0.0007304 | 0.0082085 | -0.662829 |
| XLOC_00951 | 1.6772592 | 4.6367558 | 3.5920732 | 0.0007361 | 0.0082438 | -0.669982 |
| XLOC_12_01 | 1.3490462 | 2.1308415 | 3.5884152 | 0.0007444 | 0.0083075 | -0.680264 |
| SRRM5      | 1.0573031 | 6.7688088 | 3.584523  | 0.0007533 | 0.008372  | -0.691199 |
| XLOC_00556 | 1.0441624 | 3.0124696 | 3.5820202 | 0.0007591 | 0.0084158 | -0.698226 |
| IGLL5      | 1.0768185 | 3.791576  | 3.5797347 | 0.0007644 | 0.0084485 | -0.704641 |
| STMN2      | -1.437263 | 14.061786 | -3.571952 | 0.0007828 | 0.0085953 | -0.726466 |
| XLOC_01222 | 1.1554101 | 2.6597013 | 3.5629579 | 0.0008045 | 0.0087208 | -0.751655 |
| DYDC2      | -1.411872 | 4.3086758 | -3.56285  | 0.0008048 | 0.0087208 | -0.751957 |
| XLOC_0052C | 1.2499058 | 4.2293554 | 3.5604438 | 0.0008107 | 0.0087615 | -0.758688 |
| FGF12      | -1.075625 | 9.5254851 | -3.548954 | 0.0008396 | 0.0089943 | -0.790799 |
| PCDH11X    | -1.013988 | 5.3680598 | -3.54787  | 0.0008423 | 0.0090133 | -0.793825 |
| PNCK       | -1.129729 | 6.2829251 | -3.546535 | 0.0008458 | 0.0090335 | -0.797551 |
| GPR158     | -1.342084 | 9.3260173 | -3.546078 | 0.0008469 | 0.0090336 | -0.798826 |
| BACE1-AS   | 1.6595775 | 7.0616225 | 3.5454072 | 0.0008487 | 0.0090465 | -0.800698 |
| XLOC_00706 | -1.631912 | 7.7562667 | -3.544305 | 0.0008515 | 0.0090718 | -0.803774 |
| MLLT11     | -1.186715 | 12.18294  | -3.534376 | 0.0008776 | 0.0092633 | -0.831451 |
| XLOC_01381 | -1.513629 | 9.294756  | -3.533789 | 0.0008791 | 0.0092758 | -0.833087 |
| DLX6       | -1.288941 | 5.9503042 | -3.531912 | 0.0008842 | 0.0093135 | -0.838312 |
| FCER1A     | 1.0997576 | 3.4327892 | 3.5304336 | 0.0008881 | 0.0093309 | -0.842427 |
| WDR16      | -1.016338 | 6.4433836 | -3.530126 | 0.000889  | 0.0093359 | -0.843283 |
| SLC22A10   | -1.382657 | 8.8557101 | -3.529531 | 0.0008906 | 0.0093381 | -0.844938 |
| LOC375196  | -1.013973 | 6.7307286 | -3.522361 | 0.0009101 | 0.0094659 | -0.86488  |
| PIGR       | 1.0388592 | 3.0005352 | 3.5219736 | 0.0009112 | 0.009474  | -0.865958 |
| XLOC_00218 | 1.0288271 | 2.4256423 | 3.5192795 | 0.0009187 | 0.0095278 | -0.873444 |
| S100A5     | 1.2412199 | 9.9793045 | 3.5163802 | 0.0009268 | 0.0095892 | -0.881497 |
| XLOC_01052 | 1.0858645 | 4.3947082 | 3.516159  | 0.0009274 | 0.0095894 | -0.882111 |
| XLOC_01372 | 1.1695772 | 2.2296257 | 3.5090632 | 0.0009475 | 0.0097348 | -0.901802 |
| LOC1005062 | 1.1244986 | 2.2212794 | 3.5040759 | 0.0009619 | 0.0098229 | -0.915627 |
| ELAVL4     | -1.418774 | 9.1078008 | -3.503715 | 0.000963  | 0.0098305 | -0.916627 |
| XLOC_00963 | 1.768755  | 4.3454816 | 3.5018966 | 0.0009683 | 0.0098595 | -0.921665 |
| SULT4A1    | -1.149387 | 10.652366 | -3.50141  | 0.0009697 | 0.0098646 | -0.923012 |
| CHN1       | -1.166116 | 12.398401 | -3.500677 | 0.0009719 | 0.0098798 | -0.925043 |
| PARM1      | -1.262584 | 6.258821  | -3.497831 | 0.0009802 | 0.0099372 | -0.932921 |

|            |           |           |           |           |           |           |
|------------|-----------|-----------|-----------|-----------|-----------|-----------|
| NMNAT2     | -1.496164 | 8.324399  | -3.497109 | 0.0009824 | 0.0099463 | -0.934922 |
| FAT2       | 1.3745946 | 7.0041735 | 3.4891729 | 0.0010062 | 0.0101027 | -0.95687  |
| BATF       | 1.0792718 | 5.6031166 | 3.4874238 | 0.0010115 | 0.0101388 | -0.961704 |
| XLOC_00232 | -1.165064 | 4.6253138 | -3.485519 | 0.0010173 | 0.0101789 | -0.966966 |
| LOC151484  | 1.0511373 | 4.3333984 | 3.483078  | 0.0010248 | 0.0102241 | -0.973707 |
| XLOC_00261 | 1.0934241 | 3.8382041 | 3.4779762 | 0.0010407 | 0.0103379 | -0.987787 |
| SNORD17    | 1.6144723 | 9.297433  | 3.4768899 | 0.0010441 | 0.0103502 | -0.990783 |
| SNORD66    | 1.4226604 | 7.100567  | 3.4708608 | 0.0010632 | 0.0104616 | -1.007403 |
| CALB1      | -1.753891 | 7.0577497 | -3.469607 | 0.0010673 | 0.0104911 | -1.010858 |
| CAP2       | -1.12464  | 7.692296  | -3.4674   | 0.0010744 | 0.0105351 | -1.016936 |
| OR4A5      | 1.0068925 | 3.1038881 | 3.4671639 | 0.0010751 | 0.0105362 | -1.017585 |
| KCNS2      | -1.032616 | 6.4040594 | -3.46701  | 0.0010756 | 0.0105378 | -1.01801  |
| XLOC_0075C | 1.1114686 | 4.1265617 | 3.4639861 | 0.0010854 | 0.010592  | -1.026333 |
| LOC643623  | 1.0270569 | 4.9072038 | 3.4557153 | 0.0011127 | 0.0107731 | -1.049076 |
| C6orf138   | 1.5340535 | 6.2073455 | 3.4534693 | 0.0011203 | 0.0108166 | -1.055247 |
| SNORD67    | 1.5656654 | 8.9535883 | 3.4500862 | 0.0011317 | 0.0108811 | -1.064536 |
| SNORA28    | 1.0080916 | 10.348198 | 3.448007  | 0.0011388 | 0.0109164 | -1.070243 |
| GPR4       | 1.2301234 | 6.5936924 | 3.4428207 | 0.0011566 | 0.0110511 | -1.084468 |
| C3orf30    | 1.1460348 | 2.3733474 | 3.4422991 | 0.0011584 | 0.0110579 | -1.085898 |
| SCG2       | -1.615305 | 7.9092721 | -3.440283 | 0.0011654 | 0.0110964 | -1.091425 |
| KIAA1239   | -1.014258 | 5.566774  | -3.437563 | 0.001175  | 0.0111475 | -1.098876 |
| SLC04A1    | 1.3113161 | 9.8023171 | 3.4360107 | 0.0011804 | 0.0111723 | -1.103128 |
| XLOC_0042C | -1.105331 | 5.3069869 | -3.434697 | 0.0011851 | 0.011203  | -1.106725 |
| LOC100131E | 1.3879722 | 4.6789086 | 3.434448  | 0.001186  | 0.0112069 | -1.107406 |
| XLOC_0118C | 1.2037415 | 6.5213714 | 3.4307171 | 0.0011993 | 0.0112742 | -1.117616 |
| XLOC_0041C | -1.143951 | 4.5099306 | -3.429741 | 0.0012028 | 0.0112937 | -1.120287 |
| SYNGR3     | -1.104373 | 8.6760835 | -3.42938  | 0.0012041 | 0.011296  | -1.121273 |
| ABCC12     | -1.071673 | 4.4217993 | -3.424663 | 0.0012212 | 0.0114196 | -1.134169 |
| DIRAS3     | -1.037327 | 5.1916032 | -3.41648  | 0.0012514 | 0.0116275 | -1.156515 |
| XLOC_00495 | 2.3730802 | 8.8797895 | 3.4134717 | 0.0012627 | 0.0117019 | -1.164722 |
| FGF9       | -1.293122 | 7.2967209 | -3.408321 | 0.0012822 | 0.0118181 | -1.178762 |
| C3orf80    | -1.258744 | 6.6636114 | -3.40814  | 0.0012829 | 0.0118211 | -1.179257 |
| LPP-AS2    | -1.058473 | 5.7404932 | -3.406031 | 0.001291  | 0.0118542 | -1.185001 |
| YTHDC1     | -1.113229 | 5.5220974 | -3.405382 | 0.0012935 | 0.0118641 | -1.18677  |
| TAGLN3     | -1.404402 | 9.7092429 | -3.399265 | 0.0013173 | 0.0120306 | -1.20342  |
| POT1       | 1.1424776 | 8.0948815 | 3.3940325 | 0.0013379 | 0.0121605 | -1.217646 |
| PIK3R5     | 2.0027253 | 6.8480751 | 3.3915547 | 0.0013478 | 0.0122158 | -1.224378 |
| XLOC_01099 | 1.2270961 | 2.4184471 | 3.3913916 | 0.0013485 | 0.0122182 | -1.224821 |
| LOC100507E | -1.038709 | 4.6674436 | -3.388377 | 0.0013606 | 0.0123017 | -1.233008 |
| OR52E8     | 2.1196531 | 6.9313554 | 3.3846855 | 0.0013756 | 0.0124011 | -1.243026 |
| XLOC_00625 | 2.0128317 | 5.4438614 | 3.3776983 | 0.0014045 | 0.0125726 | -1.261971 |
| XLOC_0039C | 1.1194416 | 2.4666432 | 3.3752145 | 0.0014148 | 0.012648  | -1.268699 |
| ADRA1D     | -1.067376 | 4.4985057 | -3.374217 | 0.001419  | 0.0126713 | -1.2714   |
| XLOC_00165 | 1.7865888 | 5.3970019 | 3.3738906 | 0.0014204 | 0.0126765 | -1.272285 |
| CISH       | 1.8876644 | 8.8736791 | 3.3735291 | 0.0014219 | 0.0126831 | -1.273263 |
| NKX2-3     | -1.038833 | 10.164423 | -3.3687   | 0.0014424 | 0.0127912 | -1.286333 |
| RTN1       | -1.505329 | 10.074254 | -3.367627 | 0.001447  | 0.0128203 | -1.289234 |
| PRDM12     | -1.244439 | 4.5966252 | -3.359412 | 0.0014826 | 0.0130504 | -1.311435 |
| RBM24      | -1.130209 | 5.8802108 | -3.35778  | 0.0014898 | 0.013091  | -1.315841 |
| XLOC_01432 | 1.0821668 | 5.681254  | 3.3544019 | 0.0015048 | 0.0131971 | -1.324959 |
| XLOC_00317 | 1.1098041 | 2.7518918 | 3.3485053 | 0.0015312 | 0.0133534 | -1.340859 |

|            |            |            |            |            |            |            |
|------------|------------|------------|------------|------------|------------|------------|
| LOC1005072 | 1. 0168588 | 2. 3231629 | 3. 3476009 | 0. 0015353 | 0. 0133768 | -1. 343296 |
| XLOC_00248 | 2. 1179361 | 6. 4981842 | 3. 3394829 | 0. 0015725 | 0. 0136139 | -1. 365153 |
| TAC3       | -1. 350811 | 8. 5480921 | -3. 33862  | 0. 0015766 | 0. 0136375 | -1. 367474 |
| XLOC_01113 | 1. 9694651 | 6. 320509  | 3. 3324366 | 0. 0016056 | 0. 0138324 | -1. 384098 |
| FAR2       | -1. 00394  | 5. 9955075 | -3. 331562 | 0. 0016097 | 0. 0138575 | -1. 386448 |
| XLOC_0108C | -1. 133205 | 4. 7032664 | -3. 326468 | 0. 001634  | 0. 0140062 | -1. 400124 |
| XLOC_00587 | 1. 8296089 | 7. 5718596 | 3. 3245975 | 0. 001643  | 0. 0140573 | -1. 405144 |
| INA        | -1. 079262 | 10. 71293  | -3. 318475 | 0. 0016729 | 0. 0142254 | -1. 421561 |
| XLOC_00133 | 2. 1141541 | 8. 2714074 | 3. 3140717 | 0. 0016947 | 0. 0143574 | -1. 433355 |
| XLOC_00008 | 1. 8063723 | 6. 9477708 | 3. 3110632 | 0. 0017097 | 0. 0144632 | -1. 441408 |
| KHDRBS2    | -1. 085915 | 6. 872876  | -3. 309198 | 0. 0017191 | 0. 0145222 | -1. 446397 |
| SCG5       | -1. 193683 | 11. 611863 | -3. 304874 | 0. 0017411 | 0. 0146652 | -1. 457961 |
| XLOC_00687 | 1. 0152451 | 2. 155521  | 3. 3041711 | 0. 0017447 | 0. 01468   | -1. 459838 |
| XLOC_00554 | 2. 0649703 | 6. 6603172 | 3. 2977812 | 0. 0017777 | 0. 0148602 | -1. 476904 |
| XLOC_00579 | 1. 0008295 | 2. 2191902 | 3. 2975887 | 0. 0017787 | 0. 0148608 | -1. 477418 |
| RSP02      | -1. 425529 | 6. 713399  | -3. 295731 | 0. 0017884 | 0. 0149225 | -1. 482375 |
| ZBED6      | 1. 1276762 | 8. 6264128 | 3. 2865024 | 0. 0018373 | 0. 0151898 | -1. 506976 |
| SYT13      | -1. 152597 | 10. 072805 | -3. 286482 | 0. 0018375 | 0. 0151898 | -1. 507031 |
| PAK3       | -1. 057974 | 6. 5897174 | -3. 28326  | 0. 0018549 | 0. 0152905 | -1. 515609 |
| INSL3      | -1. 228688 | 9. 2937442 | -3. 283137 | 0. 0018555 | 0. 0152918 | -1. 515934 |
| XLOC_01085 | 2. 22481   | 8. 0392661 | 3. 2815049 | 0. 0018644 | 0. 0153216 | -1. 520279 |
| ASB16      | -1. 137267 | 8. 5224054 | -3. 278912 | 0. 0018786 | 0. 0154027 | -1. 527176 |
| KRT222     | -1. 178924 | 7. 6529424 | -3. 278135 | 0. 0018828 | 0. 0154298 | -1. 529242 |
| ATXN3L     | 1. 0026853 | 4. 5276798 | 3. 2774009 | 0. 0018869 | 0. 0154489 | -1. 531194 |
| LOC1005075 | -1. 460886 | 8. 9705212 | -3. 277159 | 0. 0018882 | 0. 015449  | -1. 531836 |
| XLOC_00791 | 1. 0300509 | 4. 0686329 | 3. 2742826 | 0. 0019041 | 0. 0155513 | -1. 539481 |
| XLOC_00702 | 2. 216935  | 9. 194474  | 3. 273526  | 0. 0019084 | 0. 0155752 | -1. 541491 |
| XLOC_00666 | -1. 154212 | 8. 6984807 | -3. 270016 | 0. 001928  | 0. 0156996 | -1. 550812 |
| TAC1       | -1. 775009 | 6. 252355  | -3. 269845 | 0. 001929  | 0. 0157022 | -1. 551266 |
| XAGE-4     | 1. 1767776 | 4. 620001  | 3. 2657958 | 0. 0019519 | 0. 0158206 | -1. 562012 |
| DEFB116    | 1. 0673874 | 2. 8239497 | 3. 2651354 | 0. 0019556 | 0. 0158286 | -1. 563763 |
| CCDC66     | 1. 7100045 | 9. 1178723 | 3. 2635037 | 0. 001965  | 0. 0158796 | -1. 56809  |
| ELOVL4     | -1. 041646 | 7. 7551013 | -3. 259584 | 0. 0019875 | 0. 0160096 | -1. 578478 |
| FMR1NB     | 1. 3469524 | 5. 414767  | 3. 2576876 | 0. 0019985 | 0. 0160812 | -1. 583502 |
| XLOC_00547 | 1. 258782  | 9. 9977014 | 3. 2551375 | 0. 0020134 | 0. 0161695 | -1. 590253 |
| C1QL3      | -1. 160294 | 6. 1875918 | -3. 253317 | 0. 0020241 | 0. 0162269 | -1. 595071 |
| XLOC_00906 | -1. 049528 | 2. 4178307 | -3. 247915 | 0. 0020562 | 0. 0164019 | -1. 609357 |
| XLOC_00211 | -1. 007524 | 8. 6712309 | -3. 24753  | 0. 0020585 | 0. 0164161 | -1. 610374 |
| ZFP36      | 1. 0238519 | 9. 5468489 | 3. 2405665 | 0. 0021006 | 0. 0166523 | -1. 628767 |
| XLOC_01113 | 2. 0554504 | 7. 592025  | 3. 2385851 | 0. 0021127 | 0. 0166988 | -1. 633995 |
| SNORA27    | 1. 0735691 | 9. 0652118 | 3. 2369201 | 0. 0021229 | 0. 0167431 | -1. 638387 |
| XLOC_01111 | 1. 1737878 | 2. 4528708 | 3. 2342904 | 0. 0021392 | 0. 0168297 | -1. 645321 |
| NRIP3      | -1. 061049 | 6. 2337658 | -3. 233159 | 0. 0021462 | 0. 0168806 | -1. 648302 |
| XLOC_00418 | 2. 1549258 | 8. 5912254 | 3. 2285313 | 0. 0021752 | 0. 0170459 | -1. 660493 |
| GPR182     | 2. 2096527 | 9. 2665372 | 3. 227878  | 0. 0021793 | 0. 017074  | -1. 662213 |
| OSR1       | 1. 0567805 | 2. 5847552 | 3. 2258373 | 0. 0021922 | 0. 0171334 | -1. 667584 |
| LY6D       | -1. 02214  | 6. 4688757 | -3. 223204 | 0. 002209  | 0. 0172352 | -1. 674511 |
| LINC00230A | -1. 561016 | 5. 3840762 | -3. 219834 | 0. 0022307 | 0. 0173527 | -1. 683372 |
| XLOC_01286 | 1. 1370144 | 5. 4877562 | 3. 2178416 | 0. 0022436 | 0. 0174327 | -1. 688608 |
| XLOC_0102C | 1. 7199292 | 5. 118175  | 3. 2093968 | 0. 002299  | 0. 0176972 | -1. 710776 |
| RASL11B    | -1. 085456 | 8. 0894985 | -3. 209119 | 0. 0023009 | 0. 017705  | -1. 711505 |

|            |            |            |            |            |            |            |
|------------|------------|------------|------------|------------|------------|------------|
| SNORA45    | 1. 0555543 | 8. 0099871 | 3. 2057611 | 0. 0023233 | 0. 0178019 | -1. 720308 |
| XLOC_0023C | 1. 021968  | 2. 3164996 | 3. 1952124 | 0. 0023951 | 0. 0182078 | -1. 747925 |
| XLOC_00727 | 1. 0260122 | 4. 0901739 | 3. 1947283 | 0. 0023984 | 0. 0182252 | -1. 749191 |
| PCDHB7     | -1. 013384 | 3. 5755861 | -3. 191124 | 0. 0024234 | 0. 0183416 | -1. 758614 |
| LOC1005073 | 1. 4773784 | 5. 0118264 | 3. 190753  | 0. 002426  | 0. 0183482 | -1. 759582 |
| SFN        | 1. 0269787 | 6. 1886874 | 3. 1891834 | 0. 002437  | 0. 0184183 | -1. 763682 |
| LOC338797  | -1. 148981 | 9. 9997983 | -3. 189003 | 0. 0024383 | 0. 0184203 | -1. 764153 |
| XLOC_00131 | 1. 7770475 | 5. 7025291 | 3. 1815793 | 0. 0024909 | 0. 0186979 | -1. 783528 |
| XLOC_00919 | 1. 9406855 | 10. 509683 | 3. 1811978 | 0. 0024937 | 0. 0187112 | -1. 784523 |
| XLOC_01229 | 2. 1335945 | 9. 280275  | 3. 1798256 | 0. 0025035 | 0. 0187705 | -1. 788101 |
| OR52I2     | 1. 815036  | 4. 9731847 | 3. 1784228 | 0. 0025136 | 0. 0188044 | -1. 791757 |
| EPHA5      | -1. 180508 | 5. 4973453 | -3. 178324 | 0. 0025143 | 0. 0188044 | -1. 792016 |
| XLOC_12_01 | 1. 3754579 | 4. 6241578 | 3. 1756119 | 0. 002534  | 0. 0188939 | -1. 799081 |
| SFRP1      | 1. 0877191 | 7. 8551371 | 3. 17375   | 0. 0025476 | 0. 018968  | -1. 80393  |
| XLOC_01394 | -1. 041519 | 7. 9845573 | -3. 163769 | 0. 0026216 | 0. 0193719 | -1. 82989  |
| XLOC_00528 | 1. 1510708 | 4. 0203536 | 3. 1626648 | 0. 0026299 | 0. 0194187 | -1. 832758 |
| XLOC_00755 | 1. 2983031 | 4. 5916431 | 3. 1555981 | 0. 0026837 | 0. 0196799 | -1. 851102 |
| GPR179     | 2. 1134526 | 9. 7729666 | 3. 1511487 | 0. 0027181 | 0. 0198821 | -1. 862637 |
| NELL2      | -1. 057032 | 10. 292334 | -3. 150049 | 0. 0027267 | 0. 0199265 | -1. 865486 |
| CDH8       | -1. 35347  | 5. 5081459 | -3. 149723 | 0. 0027292 | 0. 0199337 | -1. 866332 |
| Q5A5F0     | 1. 4131848 | 7. 9882968 | 3. 1488573 | 0. 002736  | 0. 0199491 | -1. 868574 |
| XLOC_12_01 | 1. 8779397 | 6. 805304  | 3. 1463291 | 0. 0027558 | 0. 0200437 | -1. 87512  |
| PCSK1      | -2. 075271 | 8. 597486  | -3. 145238 | 0. 0027644 | 0. 0200918 | -1. 877946 |
| CASQ1      | -1. 172228 | 8. 2505324 | -3. 143081 | 0. 0027815 | 0. 0201712 | -1. 883527 |
| OSTBETA    | 2. 0100177 | 6. 1205763 | 3. 1371837 | 0. 0028287 | 0. 0204076 | -1. 898773 |
| XLOC_00769 | -1. 211136 | 4. 9443373 | -3. 132719 | 0. 002865  | 0. 020576  | -1. 910302 |
| GABRB2     | -1. 373789 | 9. 5793599 | -3. 132623 | 0. 0028658 | 0. 020576  | -1. 910552 |
| XLOC_00119 | 1. 081366  | 5. 90808   | 3. 1317034 | 0. 0028733 | 0. 0206132 | -1. 912924 |
| XLOC_00189 | 1. 8819342 | 6. 9314332 | 3. 1286336 | 0. 0028986 | 0. 0207294 | -1. 920844 |
| DYNC1I1    | -1. 268069 | 7. 7417669 | -3. 118857 | 0. 0029804 | 0. 0211355 | -1. 946032 |
| FLJ42842   | 1. 1688729 | 4. 1021951 | 3. 1186959 | 0. 0029818 | 0. 0211358 | -1. 946447 |
| ZCCHC13    | 1. 6166815 | 5. 1000849 | 3. 1173326 | 0. 0029933 | 0. 0211992 | -1. 949955 |
| XLOC_12_OC | -1. 178832 | 2. 8585246 | -3. 110952 | 0. 0030481 | 0. 0214452 | -1. 96636  |
| GLS2       | -1. 068792 | 7. 2918682 | -3. 103513 | 0. 0031132 | 0. 0217298 | -1. 985459 |
| XLOC_12_OC | 1. 0719462 | 5. 5988444 | 3. 1003915 | 0. 0031409 | 0. 0218362 | -1. 993462 |
| NLGN4Y     | -1. 020515 | 5. 5190155 | -3. 099596 | 0. 003148  | 0. 02186   | -1. 995502 |
| REEP1      | -1. 06427  | 8. 697676  | -3. 095562 | 0. 0031842 | 0. 0220255 | -2. 005835 |
| XLOC_00976 | 2. 0657628 | 8. 5570208 | 3. 0939375 | 0. 0031989 | 0. 0221033 | -2. 009995 |
| KRT79      | 2. 1667265 | 8. 2025974 | 3. 0903187 | 0. 0032318 | 0. 022281  | -2. 019255 |
| XLOC_00369 | -1. 072335 | 10. 166209 | -3. 090274 | 0. 0032322 | 0. 022281  | -2. 01937  |
| LOC1001295 | -1. 085525 | 6. 1633589 | -3. 088915 | 0. 0032447 | 0. 0223429 | -2. 022846 |
| RNASE3     | 1. 015404  | 4. 1206796 | 3. 0684576 | 0. 0034377 | 0. 0232709 | -2. 075039 |
| XLOC_01229 | 1. 8128466 | 6. 7030835 | 3. 0573905 | 0. 0035466 | 0. 0237885 | -2. 103177 |
| CEP72      | -1. 010891 | 6. 3534346 | -3. 055712 | 0. 0035634 | 0. 0238512 | -2. 107438 |
| PPBP       | 1. 054482  | 4. 4283975 | 3. 0547732 | 0. 0035728 | 0. 0238735 | -2. 109822 |
| RPA4       | 1. 8693698 | 10. 577746 | 3. 0536233 | 0. 0035844 | 0. 0239119 | -2. 112739 |
| NEUROD6    | -1. 239006 | 4. 9378759 | -3. 049831 | 0. 0036228 | 0. 0240851 | -2. 122358 |
| XLOC_12_OC | 2. 0403617 | 10. 039548 | 3. 0498008 | 0. 0036231 | 0. 0240851 | -2. 122434 |
| XLOC_01417 | -1. 105382 | 10. 452885 | -3. 047367 | 0. 003648  | 0. 0241934 | -2. 128603 |
| ZCCHC12    | -1. 098322 | 5. 482084  | -3. 047057 | 0. 0036511 | 0. 0241934 | -2. 129387 |
| XLOC_01336 | 1. 9819766 | 7. 5542581 | 3. 0456737 | 0. 0036653 | 0. 0242554 | -2. 132892 |

|            |           |           |           |           |           |           |
|------------|-----------|-----------|-----------|-----------|-----------|-----------|
| Clorf182   | -1.104054 | 8.9728082 | -3.036074 | 0.0037654 | 0.02475   | -2.157179 |
| XLOC_0070C | 1.066854  | 2.7088684 | 3.0349959 | 0.0037768 | 0.0248049 | -2.159903 |
| C13orf35   | 1.0250716 | 2.3263056 | 3.0324202 | 0.0038042 | 0.0249273 | -2.16641  |
| LOC284578  | -1.158531 | 6.0571807 | -3.031613 | 0.0038128 | 0.0249633 | -2.168447 |
| XLOC_01283 | 1.5868272 | 7.8462213 | 3.0275457 | 0.0038565 | 0.0252081 | -2.178712 |
| NAP1L2     | -1.080391 | 9.9602312 | -3.022871 | 0.0039072 | 0.0254621 | -2.190498 |
| FPR1       | 1.0286799 | 8.2038774 | 3.0204165 | 0.0039341 | 0.0255648 | -2.19668  |
| C4orf6     | 1.2651667 | 6.7403697 | 3.0159075 | 0.003984  | 0.0257844 | -2.20803  |
| PNMA2      | -1.033773 | 9.7414112 | -3.012014 | 0.0040276 | 0.0259876 | -2.217821 |
| XLOC_12_OC | -1.024821 | 7.7003175 | -3.006821 | 0.0040864 | 0.0262627 | -2.230867 |
| MCF2       | -1.155326 | 6.1704981 | -3.003524 | 0.0041241 | 0.0264296 | -2.239141 |
| XLOC_00855 | 1.6297785 | 12.414878 | 3.0016328 | 0.0041459 | 0.0264898 | -2.243883 |
| XLOC_00438 | 2.0439895 | 9.5370117 | 2.9940333 | 0.0042345 | 0.0269008 | -2.262923 |
| CPNE4      | -1.583848 | 7.8783558 | -2.983785 | 0.0043569 | 0.0274175 | -2.288546 |
| XLOC_01027 | 1.3985473 | 5.9316639 | 2.9826467 | 0.0043707 | 0.0274509 | -2.291389 |
| SNAP25     | -1.208736 | 15.75575  | -2.975762 | 0.004455  | 0.0277569 | -2.308564 |
| XLOC_01179 | 1.0127858 | 3.0142242 | 2.9633397 | 0.0046109 | 0.0284789 | -2.339482 |
| SH3GL2     | -1.354709 | 9.5169987 | -2.963208 | 0.0046126 | 0.0284789 | -2.33981  |
| ZNF184     | -1.037503 | 6.8643763 | -2.960587 | 0.0046461 | 0.0285906 | -2.346321 |
| CTXN3      | -1.645111 | 6.5286044 | -2.959875 | 0.0046553 | 0.0286269 | -2.34809  |
| BTBD11     | -1.082488 | 6.4054671 | -2.955204 | 0.0047157 | 0.028888  | -2.359683 |
| XLOC_00749 | 1.2459452 | 4.9568503 | 2.9542819 | 0.0047278 | 0.0289419 | -2.36197  |
| GSTM4      | -1.059959 | 7.1412869 | -2.954252 | 0.0047282 | 0.0289419 | -2.362044 |
| WBSCR17    | -1.023166 | 7.2543495 | -2.95383  | 0.0047337 | 0.0289591 | -2.36309  |
| SLITRK5    | -1.090338 | 6.4339115 | -2.949454 | 0.0047912 | 0.0291594 | -2.373937 |
| KCNC2      | -1.119832 | 8.1348426 | -2.949403 | 0.0047919 | 0.0291594 | -2.374063 |
| SYT4       | -1.357078 | 10.28794  | -2.946307 | 0.004833  | 0.029326  | -2.381729 |
| PTPN5      | -1.207043 | 6.0815506 | -2.944172 | 0.0048615 | 0.0294323 | -2.387013 |
| PRAMEF12   | 1.2187989 | 7.2071913 | 2.939575  | 0.0049235 | 0.0296953 | -2.398381 |
| XLOC_01082 | 1.6395707 | 6.3047248 | 2.9359302 | 0.0049731 | 0.0299385 | -2.407385 |
| B4GALT6    | -1.201638 | 6.0027897 | -2.924986 | 0.005125  | 0.0305504 | -2.434375 |
| ACOT7      | -1.068395 | 9.3736627 | -2.923372 | 0.0051478 | 0.0306448 | -2.438347 |
| XLOC_01368 | 1.283941  | 5.1922267 | 2.921373  | 0.0051761 | 0.0307677 | -2.443268 |
| XLOC_0094C | 1.2594404 | 8.009887  | 2.9191645 | 0.0052075 | 0.0308794 | -2.448701 |
| XLOC_00452 | 1.9975268 | 8.7437966 | 2.9157542 | 0.0052565 | 0.0310872 | -2.457085 |
| PPP6R1     | 1.7480757 | 11.421678 | 2.9147311 | 0.0052712 | 0.0311436 | -2.459599 |
| XLOC_00709 | -1.054366 | 9.3094501 | -2.914663 | 0.0052722 | 0.0311436 | -2.459765 |
| ERAP2      | 1.0360144 | 6.4745579 | 2.9126613 | 0.0053012 | 0.0312395 | -2.464682 |
| LOC400622  | -1.046151 | 6.4439463 | -2.904511 | 0.0054208 | 0.0316996 | -2.484674 |
| XLOC_01262 | 1.1142434 | 10.100208 | 2.903521  | 0.0054355 | 0.0317451 | -2.487101 |
| XLOC_00028 | -1.274564 | 3.9370214 | -2.902227 | 0.0054548 | 0.0318345 | -2.490272 |
| IPCEF1     | -1.072043 | 5.8191797 | -2.901011 | 0.005473  | 0.0319054 | -2.49325  |
| PABPC1L2A  | -1.289145 | 5.556102  | -2.898515 | 0.0055104 | 0.0320715 | -2.499359 |
| C4orf51    | 1.23914   | 4.0562786 | 2.8975374 | 0.0055251 | 0.0321398 | -2.501751 |
| KDM5D      | -1.548644 | 5.4692353 | -2.893253 | 0.0055902 | 0.0324099 | -2.512228 |
| XLOC_00566 | 1.4359509 | 5.7018202 | 2.8863977 | 0.0056957 | 0.0328318 | -2.528967 |
| PLCXD3     | -1.165771 | 8.0708853 | -2.882872 | 0.0057507 | 0.0330441 | -2.537566 |
| SNORD97    | 1.0119162 | 7.166234  | 2.878554  | 0.0058187 | 0.0333096 | -2.548086 |
| XLOC_00233 | -1.004424 | 11.247716 | -2.872339 | 0.0059178 | 0.0337446 | -2.563208 |
| XLOC_00166 | -1.066873 | 9.7438196 | -2.851132 | 0.0062683 | 0.0350208 | -2.614633 |
| XLOC_12_01 | -1.091287 | 8.095087  | -2.846757 | 0.0063429 | 0.0353055 | -2.625211 |

|            |           |           |           |           |           |           |
|------------|-----------|-----------|-----------|-----------|-----------|-----------|
| MAGEB6     | 2.0198706 | 5.9957807 | 2.8435776 | 0.0063977 | 0.0355213 | -2.632888 |
| XLOC_00049 | 1.1123364 | 7.0160242 | 2.8428721 | 0.0064099 | 0.0355581 | -2.634591 |
| KCNJ6      | -1.196734 | 7.6687615 | -2.824857 | 0.0067291 | 0.0368886 | -2.677972 |
| PCK1       | 1.2013833 | 4.5011782 | 2.806488  | 0.0070696 | 0.0382262 | -2.722    |
| GPR22      | -1.087267 | 6.4783067 | -2.804269 | 0.0071118 | 0.0384157 | -2.727304 |
| VPS18      | 1.3454026 | 13.545675 | 2.7948117 | 0.0072943 | 0.0390919 | -2.749878 |
| NXPH2      | -1.046024 | 3.9306313 | -2.789022 | 0.0074081 | 0.0395237 | -2.763671 |
| XLOC_12_0C | -1.178587 | 7.7829093 | -2.782105 | 0.0075463 | 0.0400347 | -2.780121 |
| NMU        | -1.302236 | 4.8934556 | -2.781644 | 0.0075556 | 0.0400469 | -2.781216 |
| XLOC_01146 | -1.286427 | 8.0329175 | -2.755366 | 0.008103  | 0.0420997 | -2.843434 |
| WNT2B      | 1.0598093 | 6.8711834 | 2.7545727 | 0.0081201 | 0.0421511 | -2.845305 |
| RGS1       | 1.2659356 | 8.7228348 | 2.743664  | 0.0083584 | 0.0430743 | -2.871001 |
| CNNM1      | -1.03481  | 5.400414  | -2.733105 | 0.0085951 | 0.0439203 | -2.8958   |
| XLOC_00132 | -1.278797 | 7.2438797 | -2.730895 | 0.0086454 | 0.0440986 | -2.900983 |
| PPM1E      | -1.09391  | 5.8753267 | -2.724642 | 0.0087893 | 0.0445594 | -2.915628 |
| SMEK3P     | 1.01923   | 2.5996809 | 2.7237746 | 0.0088094 | 0.0446043 | -2.917657 |
| XLOC_00593 | 1.2976123 | 5.2325797 | 2.7236084 | 0.0088133 | 0.0446043 | -2.918046 |
| C13orf30   | 1.5123408 | 5.446684  | 2.7188031 | 0.0089256 | 0.0449574 | -2.92928  |
| XLOC_01109 | 1.2719351 | 6.7114416 | 2.7139334 | 0.0090408 | 0.0453737 | -2.94065  |
| XLOC_00399 | 1.071668  | 2.0409684 | 2.7088532 | 0.0091624 | 0.0457838 | -2.952496 |
| NUDT11     | -1.010248 | 5.3501953 | -2.701504 | 0.009341  | 0.0464371 | -2.969603 |
| MUCL1      | -1.121733 | 4.0776331 | -2.69587  | 0.00948   | 0.046883  | -2.982694 |
| AMPH       | -1.275861 | 7.9164019 | -2.680273 | 0.009875  | 0.0483278 | -3.018827 |
| SNORD38A   | 1.3125807 | 8.9569536 | 2.6669387 | 0.0102246 | 0.0495996 | -3.049597 |
