# Supplementary material for: Identification and Experimental Validation of Marker Genes between Diabetes and Alzheimer’s Disease
Source: Hindawi journal article supplement (doi:10.1155/2022/8122532), 2022-01-01

CON AD

0.7

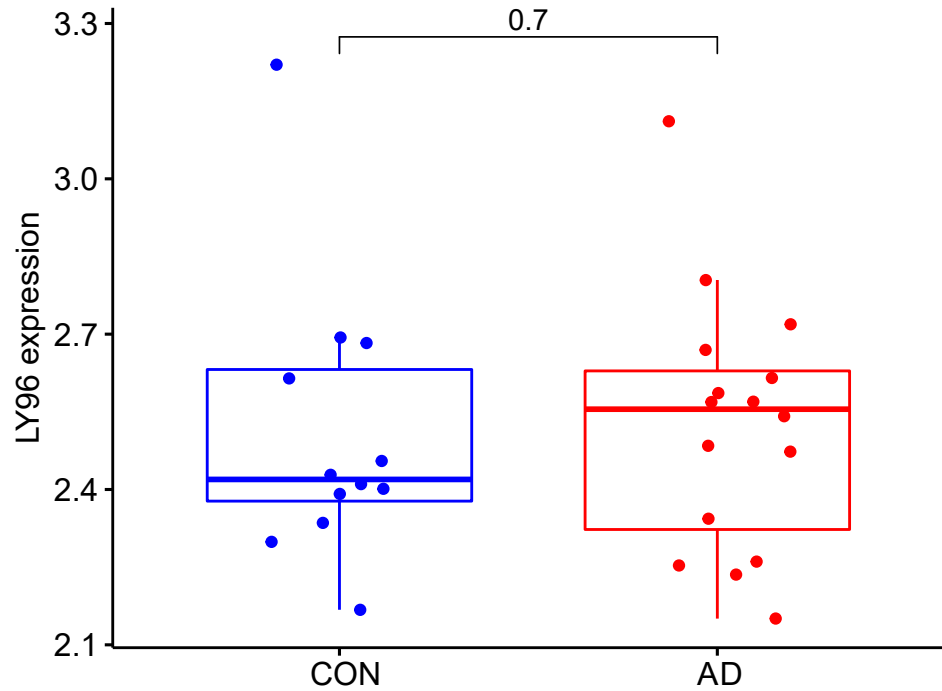

Supplement: f6 [file 8122532.f6.pdf]
